# Supplementary material for: DNA damage signaling in Drosophila macrophages modulates systemic cytokine levels in response to oxidative stress
Source: eLife. 2024 Jan 8;12:RP86700. doi: 10.7554/eLife.86700 (PMC10945508; doi:10.7554/eLife.86700)
Supplement: Supplementary file 1. [file elife-86700-supp1.xlsx]

## Sheet: Tabelle1
Gene name	p-value	Average Log2 Fold Change	pct.1	pct.2	adjusted p-value	Cluster Identity
Sema2a	1.72292e-44	1.61629	0.807	0.371	2.05527e-40	1
Pxn	7.3527e-41	1.41812	0.861	0.475	8.77104e-37	1
CG5953	1.67947e-39	-2.67461	0.126	0.567	2.00344e-35	1
CG31145	1.12145e-37	1.12782	0.929	0.706	1.33778e-33	1
InR	1.27671e-37	-1.5787	0.655	0.895	1.52299e-33	1
CG17574	1.03257e-36	1.24919	0.857	0.578	1.23176e-32	1
regucalcin	4.29565e-33	1.27905	0.819	0.425	5.12428e-29	1
Ten-m	2.97481e-31	0.673577	1	0.995	3.54865e-27	1
Hml	3.24303e-28	1.07333	0.891	0.6	3.86861e-24	1
Kr-h1	5.16498e-27	-1.85748	0.168	0.547	6.16131e-23	1
Lpin	9.75958e-27	-2.35909	0.055	0.363	1.16422e-22	1
CG10383	2.93431e-26	-2.17141	0.067	0.393	3.50034e-22	1
pum	3.83015e-26	0.565684	1	0.993	4.56899e-22	1
CG5151	4.39722e-24	0.909498	0.924	0.769	5.24544e-20	1
cv-c	2.37546e-23	-1.02162	0.824	0.942	2.83368e-19	1
cwo	7.93455e-23	-1.41353	0.345	0.688	9.46512e-19	1
wake	3.34391e-21	1.2622	0.609	0.396	3.98895e-17	1
bmm	1.71713e-20	-1.78085	0.109	0.414	2.04837e-16	1
stv	5.53613e-20	-2.12214	0.034	0.282	6.60405e-16	1
Had2	7.11022e-20	1.20913	0.534	0.28	8.48178e-16	1
PRAS40	9.16304e-20	-1.8963	0.105	0.402	1.09306e-15	1
CG46385	9.81718e-20	-1.27717	0.55	0.791	1.17109e-15	1
AdSS	2.14654e-19	-1.68348	0.013	0.227	2.5606e-15	1
Ppn	6.90264e-18	0.634534	1	0.958	8.23416e-14	1
CG31324	7.51538e-18	-1.86669	0.126	0.402	8.96509e-14	1
prage	1.06104e-17	-1.76145	0.076	0.337	1.26572e-13	1
RapGAP1	1.1415e-17	0.867906	0.866	0.673	1.3617e-13	1
mamo	1.50543e-17	0.710986	0.95	0.828	1.79583e-13	1
Pdk	1.77601e-17	-1.47359	0.189	0.479	2.11861e-13	1
cpx	2.62686e-17	1.36238	0.382	0.183	3.13358e-13	1
psq	3.12703e-16	0.67218	0.916	0.799	3.73024e-12	1
CG18135	1.27191e-15	-1.67123	0.16	0.388	1.51726e-11	1
pan	1.79136e-15	0.83397	0.84	0.712	2.13692e-11	1
Prps	3.80653e-15	-1.66969	0.16	0.392	4.54081e-11	1
uex	1.03017e-14	0.793185	0.693	0.524	1.22889e-10	1
CG32982	2.82158e-14	-1.63902	0.231	0.48	3.36586e-10	1
Prosap	5.43168e-14	0.522203	0.975	0.94	6.47945e-10	1
mtd	7.80553e-14	0.628845	0.895	0.73	9.31122e-10	1
sgg	8.9506e-14	-0.783173	0.647	0.844	1.06772e-09	1
Sema5c	1.34074e-13	1.05855	0.66	0.48	1.59936e-09	1
CG42524	1.59895e-13	0.918364	0.529	0.331	1.90739e-09	1
h	1.78706e-12	-1.1289	0.176	0.425	2.13179e-08	1
aay	3.17184e-12	-1.22857	0.017	0.17	3.78369e-08	1
cact	5.86983e-12	-1.00975	0.227	0.465	7.00212e-08	1
CG3777	2.00088e-11	1.08686	0.366	0.195	2.38685e-07	1
hdc	2.06607e-11	0.554701	0.945	0.856	2.46461e-07	1
Syp	2.16916e-11	0.561237	0.933	0.833	2.58759e-07	1
puc	2.42199e-11	-1.08151	0.353	0.591	2.88919e-07	1
mbc	3.96357e-11	0.824279	0.567	0.464	4.72814e-07	1
Xrp1	4.16676e-11	-0.899937	0.525	0.747	4.97053e-07	1
GstD1	6.85119e-11	-1.46778	0.113	0.316	8.17279e-07	1
LpR1	2.89954e-10	-1.67255	0.05	0.196	3.45886e-06	1
CG31637	3.71214e-10	0.74226	0.588	0.473	4.42821e-06	1
MtnA	3.73959e-10	-0.996961	0.13	0.329	4.46095e-06	1
Thor	4.05414e-10	-1.11071	0.223	0.44	4.83619e-06	1
CG3961	7.23033e-10	0.826904	0.521	0.342	8.62506e-06	1
CG43236	7.76359e-10	1.24631	0.256	0.113	9.26119e-06	1
GlcAT-P	1.73725e-09	0.679829	0.672	0.502	2.07237e-05	1
CG5973	2.00187e-09	0.888572	0.399	0.225	2.38803e-05	1
CG41378	2.43623e-09	0.589301	0.681	0.591	2.90618e-05	1
CG9171	3.43808e-09	0.780962	0.454	0.334	4.10128e-05	1
CG1208	4.23101e-09	-0.957228	0.092	0.268	5.04717e-05	1
CG18067	4.7919e-09	-1.09201	0.08	0.143	5.71626e-05	1
CG9328	5.044e-09	0.709281	0.571	0.461	6.01699e-05	1
Fas3	6.68034e-09	-1.95084	0.084	0.25	7.96897e-05	1
Pgant9	9.99977e-09	0.471977	0.832	0.678	0.000119287	1
CG17124	1.1762e-08	0.8361	0.529	0.406	0.000140309	1
Btk29A	1.38333e-08	0.498342	0.895	0.748	0.000165018	1
l(1)G0196	1.70622e-08	0.667278	0.534	0.377	0.000203535	1
Glut4EF	1.89775e-08	-0.762352	0.815	0.909	0.000226383	1
Pkc53E	1.96959e-08	1.01542	0.185	0.092	0.000234952	1
CG17839	1.99222e-08	-1.75071	0.021	0.139	0.000237652	1
pnr	2.14513e-08	0.599439	0.639	0.536	0.000255892	1
Mob2	2.39756e-08	-0.640082	0.744	0.86	0.000286005	1
app	3.50948e-08	0.686489	0.454	0.375	0.000418646	1
CG7530	3.52843e-08	-1.20393	0.042	0.176	0.000420906	1
CG11089	3.77676e-08	-0.781308	0.021	0.134	0.00045053	1
mnb	3.83615e-08	-0.853724	0.231	0.429	0.000457615	1
kuz	4.59364e-08	0.487305	0.891	0.806	0.000547975	1
shep	4.62479e-08	0.298011	1	0.983	0.000551691	1
sra	5.19255e-08	-0.866505	0.092	0.245	0.00061942	1
GEFmeso	5.56723e-08	-0.775286	0.269	0.471	0.000664115	1
Fer1HCH	5.98001e-08	-0.854784	0.374	0.574	0.000713355	1
CG3376	6.54425e-08	-0.826736	0.29	0.487	0.000780663	1
CG11050	6.92935e-08	-1.03467	0.017	0.123	0.000826602	1
flw	7.1984e-08	0.699439	0.429	0.342	0.000858697	1
Fer2LCH	7.7131e-08	-0.846246	0.399	0.593	0.000920095	1
Atg8a	7.90498e-08	-0.890773	0.197	0.387	0.000942985	1
RpLP2	8.03291e-08	-0.914837	0.101	0.223	0.000958246	1
MESR3	8.04729e-08	0.476518	0.777	0.737	0.000959961	1
CG1943	8.24969e-08	-0.891073	0.08	0.228	0.000984106	1
MFS17	9.21897e-08	0.507581	0.739	0.676	0.00109973	1
kay	1.13476e-07	-0.878906	0.252	0.449	0.00135366	1
Galphao	1.15688e-07	0.705822	0.378	0.289	0.00138005	1
jim	1.2349e-07	-0.758218	0.29	0.49	0.00147311	1
CenG1A	1.35857e-07	-0.886976	0.059	0.189	0.00162063	1
nkd	1.54655e-07	-1.13184	0.071	0.22	0.00184488	1
Gadd45	1.5976e-07	-1.23123	0.038	0.167	0.00190577	1
ham	1.60033e-07	0.77641	0.349	0.249	0.00190903	1
CG31183	1.71949e-07	0.91178	0.197	0.116	0.00205118	1
DIP-lambda	1.79017e-07	0.635779	0.609	0.481	0.0021355	1
Rala	1.84637e-07	0.488001	0.538	0.495	0.00220253	1
rl	1.91655e-07	0.297638	0.987	0.962	0.00228625	1
CG45050	2.14033e-07	-0.507568	0.601	0.777	0.0025532	1
cnc	2.41001e-07	-0.555608	0.546	0.724	0.0028749	1
ena	2.66394e-07	0.618932	0.689	0.562	0.00317782	1
CG42694	3.12033e-07	0.869007	0.172	0.086	0.00372225	1
Pect	3.14439e-07	-0.579661	0.155	0.307	0.00375094	1
Nrg	3.39471e-07	-1.41785	0.042	0.163	0.00404955	1
DIP-alpha	3.98244e-07	-0.346848	0.479	0.667	0.00475065	1
RpL19	4.50366e-07	-1.00505	0.168	0.324	0.00537241	1
fax	5.58646e-07	-0.702952	0.466	0.646	0.00666409	1
anne	5.73267e-07	0.449471	0.294	0.269	0.0068385	1
Dbp80	5.88142e-07	0.486784	0.752	0.676	0.00701594	1
cv-2	6.37219e-07	-1.16756	0.013	0.101	0.00760138	1
oys	6.65962e-07	-0.715235	0.147	0.298	0.00794426	1
ush	6.69524e-07	0.491086	0.811	0.704	0.00798675	1
Atg18b	6.90046e-07	-0.80864	0.126	0.277	0.00823156	1
CG3168	7.09335e-07	-1.16081	0.025	0.126	0.00846165	1
SCaMC	7.70222e-07	-0.964804	0.147	0.315	0.00918797	1
CG33144	8.06692e-07	0.626423	0.521	0.404	0.00962303	1
unc-13	8.22816e-07	0.504624	0.664	0.566	0.00981538	1
unk	8.33677e-07	-0.850914	0.097	0.244	0.00994494	1
caps	8.90463e-07	-1.27628	0.021	0.121	0.0106223	1
ref(2)P	8.97763e-07	-0.691841	0.063	0.19	0.0107094	1
spri	9.1076e-07	0.413175	0.798	0.745	0.0108645	1
Col4a1	9.39293e-07	0.347456	0.975	0.914	0.0112048	1
lbk	9.60855e-07	-0.668988	0.45	0.611	0.011462	1
CG13868	9.69169e-07	-0.800653	0.244	0.431	0.0115612	1
RpS9	1.03298e-06	-0.777165	0.13	0.272	0.0123224	1
Tgi	1.10004e-06	0.700543	0.298	0.205	0.0131223	1
Atg1	1.21386e-06	-0.821693	0.16	0.321	0.0144801	1
Fim	1.21528e-06	-0.687397	0.223	0.398	0.0144971	1
apolpp	1.23313e-06	0.616339	0.487	0.323	0.01471	1
Gel	1.2453e-06	0.577171	0.353	0.286	0.0148551	1
Cals	1.45625e-06	0.450056	0.252	0.248	0.0173717	1
raskol	1.72011e-06	0.557872	0.248	0.214	0.0205192	1
CG15784	1.7367e-06	-0.874018	0.025	0.116	0.0207171	1
NimC4	1.85918e-06	-1.23285	0.017	0.11	0.0221782	1
Gyf	1.92668e-06	0.436956	0.336	0.319	0.0229834	1
DOR	1.97387e-06	0.68273	0.357	0.282	0.0235463	1
AnxB9	2.0829e-06	-0.869256	0.189	0.354	0.0248469	1
NaCP60E	2.12303e-06	0.709164	0.319	0.226	0.0253256	1
ckn	2.27248e-06	0.647771	0.286	0.218	0.0271084	1
Hex-A	2.44927e-06	-0.744774	0.155	0.314	0.0292173	1
Pde9	2.45277e-06	0.592107	0.681	0.576	0.0292591	1
Lmpt	2.47347e-06	-1.14666	0.029	0.134	0.029506	1
CG14207	2.47959e-06	-0.762755	0.017	0.105	0.029579	1
Hsc70Cb	2.63575e-06	-0.439466	0.139	0.266	0.0314419	1
dl	2.85393e-06	-1.10191	0.038	0.15	0.0340445	1
CG33298	3.01023e-06	0.544608	0.5	0.413	0.0359091	1
CG18628	3.45599e-06	-0.670396	0.029	0.13	0.0412265	1
RhoGAP15B	3.50141e-06	-0.70555	0.105	0.234	0.0417683	1
shot	3.60036e-06	0.344191	0.912	0.893	0.0429487	1
Ubi-p63E	3.67506e-06	-0.945505	0.265	0.439	0.0438398	1
Mct1	3.77661e-06	-0.318052	0.092	0.181	0.0450512	1
Pcyt1	3.97156e-06	-0.618344	0.046	0.144	0.0473767	1
step	3.97322e-06	-0.29935	0.298	0.449	0.0473966	1
cic	3.33383e-32	1.19541	0.991	0.949	3.97692e-28	2
Glut4EF.1	2.3882e-31	1.12721	0.968	0.878	2.84889e-27	2
Lpin.1	3.52289e-29	1.58316	0.605	0.253	4.20246e-25	2
Spn.1	5.607e-24	1.02886	0.855	0.637	6.6886e-20	2
Mmp2.1	1.63044e-22	-2.04205	0.168	0.517	1.94495e-18	2
Mob2.1	6.65007e-21	0.84955	0.936	0.821	7.93287e-17	2
sgg.1	5.73049e-20	0.784872	0.95	0.782	6.8359e-16	2
PRAS40.1	6.17627e-20	1.4112	0.577	0.307	7.36767e-16	2
CG18135.1	6.4977e-19	1.28283	0.541	0.311	7.7511e-15	2
InR.1	4.29471e-18	0.706143	0.973	0.83	5.12316e-14	2
Kr-h1.1	1.64322e-17	1.05262	0.7	0.439	1.96019e-13	2
Pvr	9.80663e-17	0.66789	0.968	0.86	1.16983e-12	2
Crtc.1	1.21543e-16	0.928646	0.7	0.5	1.44989e-12	2
RhoGAP71E	2.33313e-16	-1.43544	0.309	0.601	2.78319e-12	2
Cip4	3.70792e-16	-1.54971	0.286	0.58	4.42318e-12	2
Sema2a.1	3.80768e-16	-1.65984	0.209	0.493	4.54219e-12	2
Msp300	4.28256e-16	-1.66426	0.355	0.613	5.10867e-12	2
CHES-1-like.1	5.81065e-16	0.947789	0.491	0.351	6.93152e-12	2
jim.1	3.19067e-15	0.947162	0.641	0.42	3.80615e-11	2
Pdk.1	1.06818e-14	0.968748	0.627	0.39	1.27423e-10	2
CG12163	1.38723e-14	0.834245	0.691	0.537	1.65483e-10	2
luna	1.42851e-14	-1.04233	0.65	0.835	1.70407e-10	2
Pxn.1	2.14651e-14	-1.35681	0.309	0.587	2.56057e-10	2
CG5953.1	3.19822e-14	0.875665	0.705	0.449	3.81516e-10	2
CG10383.1	3.84432e-14	1.06755	0.545	0.295	4.58589e-10	2
CG32982.1	7.96091e-14	1.17456	0.614	0.402	9.49657e-10	2
cwo.1	1.37839e-13	0.871098	0.759	0.603	1.64428e-09	2
regucalcin.1	2.64333e-13	-0.991608	0.259	0.539	3.15323e-09	2
CG5059.1	3.21369e-13	0.951046	0.518	0.315	3.83361e-09	2
egh.1	5.87258e-13	-1.11513	0.195	0.465	7.0054e-09	2
mnb.1	9.40656e-13	0.950868	0.582	0.358	1.12211e-08	2
CG7530.1	9.76584e-13	1.24389	0.273	0.129	1.16497e-08	2
Dyrk2	1.00865e-12	0.853053	0.714	0.535	1.20322e-08	2
CG31324.1	1.26162e-12	1.04728	0.545	0.317	1.50498e-08	2
Pli.1	1.62609e-12	0.967006	0.591	0.377	1.93976e-08	2
hdc.1	2.04325e-12	-0.684331	0.75	0.895	2.43739e-08	2
Pax	3.87273e-12	-1.44562	0.064	0.261	4.61978e-08	2
CG13868.1	4.42148e-12	0.920318	0.555	0.368	5.27439e-08	2
alphaTub84B	5.43879e-12	-1.18865	0.073	0.269	6.48793e-08	2
spir	5.92076e-12	-1.42651	0.255	0.493	7.06287e-08	2
CG10543	7.12488e-12	0.67859	0.809	0.722	8.49927e-08	2
mgl	7.4899e-12	-1.76542	0.123	0.355	8.9347e-08	2
CG17574.1	1.54337e-11	-0.981551	0.427	0.665	1.84109e-07	2
gish	2.02259e-11	-0.980362	0.277	0.542	2.41275e-07	2
Rtnl1	4.17216e-11	-1.32708	0.009	0.142	4.97698e-07	2
RanBPM.1	4.42192e-11	0.910916	0.414	0.262	5.27491e-07	2
flw.1	5.69723e-11	-1.05942	0.164	0.394	6.79623e-07	2
Moe	5.96825e-11	-0.78054	0.264	0.511	7.11952e-07	2
zip	6.38312e-11	-1.07556	0.123	0.338	7.61442e-07	2
Prps.1	9.54225e-11	0.959631	0.459	0.33	1.1383e-06	2
aqz	1.48818e-10	0.494791	0.964	0.885	1.77525e-06	2
Act42A.1	2.01326e-10	-1.27552	0.036	0.199	2.40162e-06	2
NimB4	2.83115e-10	0.674907	0.477	0.378	3.37728e-06	2
CG3376.1	3.50137e-10	0.864209	0.605	0.423	4.17679e-06	2
sr	4.37684e-10	0.721355	0.668	0.51	5.22113e-06	2
CG32486	4.38137e-10	0.634747	0.632	0.523	5.22653e-06	2
Atg1.1	5.04244e-10	0.881978	0.391	0.274	6.01513e-06	2
Fas3.1	6.29326e-10	-2.20776	0.082	0.247	7.50723e-06	2
betaTub60D	7.37976e-10	-1.64441	0.095	0.285	8.80331e-06	2
CG43867	1.30832e-09	-1.45046	0.036	0.189	1.56069e-05	2
uex.1	1.43586e-09	-0.613377	0.355	0.592	1.71284e-05	2
bmm.1	1.99818e-09	0.890655	0.527	0.329	2.38362e-05	2
MYPT-75D	2.81114e-09	0.795699	0.705	0.509	3.35341e-05	2
AdSS.1	3.33185e-09	0.944885	0.309	0.167	3.97456e-05	2
Thor.1	3.92513e-09	0.885166	0.545	0.374	4.68229e-05	2
CG46385.1	4.44804e-09	0.618168	0.85	0.73	5.30607e-05	2
CrebA.1	4.56451e-09	-1.25194	0.095	0.288	5.445e-05	2
drpr	5.91749e-09	0.571671	0.855	0.733	7.05897e-05	2
l(3)L1231	6.01141e-09	0.499199	0.773	0.719	7.17102e-05	2
lbk.1	7.27184e-09	0.621527	0.673	0.566	8.67458e-05	2
CG5888.1	1.04544e-08	-0.832189	0.164	0.355	0.00012471	2
Atg17.1	1.08412e-08	0.744418	0.455	0.315	0.000129324	2
CG42524.1	1.09773e-08	-0.800873	0.195	0.399	0.000130948	2
chic	1.2406e-08	-0.656246	0.205	0.399	0.000147991	2
kermit	1.54241e-08	0.965481	0.136	0.051	0.000183995	2
app.1	1.69713e-08	-0.861512	0.214	0.422	0.00020245	2
CG5973.1	1.8213e-08	-1.19047	0.105	0.284	0.000217263	2
sra.1	1.87293e-08	0.881505	0.345	0.194	0.000223422	2
CG32767	2.07214e-08	0.659562	0.714	0.598	0.000247185	2
B4	2.20932e-08	-1.16032	0.023	0.151	0.00026355	2
fs(1)h.1	2.21599e-08	0.501817	0.709	0.677	0.000264345	2
LpR1.1	2.83585e-08	1.1999	0.291	0.148	0.000338289	2
Smr	2.86268e-08	0.47839	0.886	0.851	0.000341489	2
scb	2.99405e-08	-1.11904	0.036	0.171	0.000357161	2
Cam	3.20683e-08	-0.96588	0.345	0.542	0.000382543	2
foxo	3.28878e-08	0.602016	0.659	0.531	0.000392319	2
pigs.1	3.41875e-08	-0.729468	0.391	0.62	0.000407823	2
CG4250.1	4.19086e-08	-0.917122	0.191	0.385	0.000499927	2
LanA.1	5.3842e-08	-0.9276	0.077	0.229	0.000642281	2
Had2.1	6.29172e-08	-1.00029	0.164	0.355	0.000750539	2
CG4404.1	6.3121e-08	0.900651	0.264	0.147	0.00075297	2
Mkp3	6.54781e-08	-1.15735	0.15	0.347	0.000781088	2
CG8679	9.26657e-08	0.848006	0.127	0.058	0.00110541	2
CG9005	9.38516e-08	0.730316	0.482	0.366	0.00111956	2
CG43236.1	1.02319e-07	-1.22635	0.032	0.158	0.00122057	2
px	1.1699e-07	0.469621	0.805	0.77	0.00139557	2
crq	1.21638e-07	-0.384619	0.282	0.465	0.00145102	2
Sap47	1.63831e-07	0.665162	0.495	0.408	0.00195434	2
Naam	1.80324e-07	-1.3517	0.114	0.278	0.00215108	2
bbc	1.9446e-07	-0.882726	0.095	0.25	0.00231971	2
Blimp-1	1.98044e-07	0.517219	0.614	0.553	0.00236246	2
Atg18b.1	2.02986e-07	0.708095	0.35	0.232	0.00242142	2
CG9003	2.43367e-07	0.689013	0.455	0.306	0.00290313	2
Frl	2.65346e-07	-0.910499	0.236	0.426	0.00316531	2
norpA	2.92475e-07	-0.664092	0.282	0.478	0.00348893	2
CG6191	2.95509e-07	0.829466	0.182	0.105	0.00352513	2
zfh1	3.0663e-07	0.431924	0.973	0.901	0.00365779	2
Gapvd1	3.14298e-07	0.774567	0.155	0.079	0.00374926	2
firl.1	3.30552e-07	-1.25017	0.032	0.152	0.00394316	2
EDTP	3.42605e-07	0.853397	0.314	0.187	0.00408693	2
kst	3.98803e-07	-0.789578	0.082	0.216	0.00475732	2
PDZ-GEF	4.01651e-07	0.620672	0.336	0.257	0.0047913	2
CG9674.1	4.12794e-07	0.592728	0.459	0.286	0.00492422	2
klar.1	4.36433e-07	-0.637603	0.405	0.61	0.00520621	2
CG1208.1	4.60901e-07	0.940504	0.364	0.213	0.00549808	2
CG42674	4.87026e-07	-1.11975	0.027	0.138	0.00580973	2
sick	5.29166e-07	-1.10874	0.018	0.12	0.00631243	2
apolpp.1	5.64712e-07	-0.484967	0.214	0.378	0.00673645	2
Sema2b.1	5.95389e-07	0.701128	0.323	0.26	0.00710239	2
dikar	6.05375e-07	0.521893	0.436	0.382	0.00722152	2
CG32264.1	6.07642e-07	-0.747078	0.286	0.476	0.00724856	2
wake.1	6.16247e-07	-0.981227	0.273	0.464	0.00735121	2
CG3328	6.20187e-07	0.514715	0.595	0.534	0.00739821	2
hfp	6.54268e-07	0.632404	0.318	0.24	0.00780476	2
sno	7.37834e-07	0.718988	0.209	0.142	0.00880162	2
Hml.1	7.41458e-07	-0.890346	0.532	0.674	0.00884486	2
shep.1	7.49977e-07	-0.368158	0.973	0.989	0.00894647	2
CG12065	8.5995e-07	0.489267	0.668	0.593	0.0102583	2
CG42668	9.33293e-07	-0.884937	0.1	0.252	0.0111333	2
SCaMC.1	9.44721e-07	0.626013	0.323	0.279	0.0112696	2
CG12576.1	9.60537e-07	0.753726	0.373	0.254	0.0114582	2
cora.1	9.62657e-07	-0.61185	0.323	0.517	0.0114835	2
Tlk.1	9.96746e-07	0.422566	0.686	0.679	0.0118902	2
eEF2.1	1.17269e-06	0.269477	0.268	0.323	0.013989	2
unk.1	1.21913e-06	0.821839	0.323	0.198	0.014543	2
mbc.1	1.30978e-06	-0.602638	0.323	0.512	0.0156244	2
Cyp4ac3	1.3331e-06	0.840258	0.132	0.058	0.0159026	2
CG6891	1.42059e-06	-1.14845	0.009	0.101	0.0169463	2
CG18171	1.58717e-06	0.581074	0.364	0.3	0.0189333	2
AdipoR	1.59921e-06	0.567926	0.182	0.163	0.0190769	2
CG3777.1	1.64717e-06	-1.00692	0.095	0.25	0.0196491	2
ATP8A	1.81048e-06	-1.0425	0.059	0.186	0.0215972	2
cdi	1.88564e-06	-0.798663	0.159	0.327	0.0224938	2
CG6357	1.93259e-06	-0.627334	0.027	0.116	0.0230539	2
bves	1.95849e-06	-0.783451	0.114	0.257	0.0233629	2
Ziz.1	2.04281e-06	0.761145	0.441	0.313	0.0243687	2
RhoGAP93B	2.27337e-06	-0.531962	0.055	0.148	0.027119	2
mtgo	2.50064e-06	0.313741	0.982	0.96	0.0298301	2
Socs16D	2.60095e-06	0.674152	0.164	0.12	0.0310267	2
bwa.1	2.62729e-06	0.767086	0.25	0.14	0.0313409	2
rudhira	2.67533e-06	0.534243	0.664	0.556	0.031914	2
Ran	2.78713e-06	-0.530658	0.027	0.107	0.0332477	2
tai	3.01033e-06	0.424229	0.877	0.809	0.0359102	2
Pdcd4.1	3.05733e-06	0.623099	0.168	0.13	0.0364709	2
Syp.1	3.10032e-06	-0.455944	0.75	0.87	0.0369837	2
pan.1	3.11892e-06	-0.468905	0.591	0.762	0.0372056	2
l(3)80Fg.1	3.13416e-06	-0.733575	0.477	0.635	0.0373875	2
Usp15-31	4.02761e-06	-0.945177	0.045	0.158	0.0480454	2
Kr-h1.2	2.15567e-18	0.849086	0.762	0.43	2.57149e-14	3
CG10383.2	9.80466e-17	0.696272	0.586	0.29	1.1696e-12	3
InR.2	1.52555e-16	0.522829	0.981	0.83	1.81983e-12	3
CG3376.2	2.30519e-16	0.81307	0.714	0.405	2.74986e-12	3
Pvr.1	1.82968e-15	0.538024	0.99	0.857	2.18262e-11	3
sgg.2	3.00054e-15	0.694114	0.929	0.788	3.57934e-11	3
CG12576.2	7.33183e-15	0.687554	0.49	0.234	8.74614e-11	3
CG32982.2	8.72359e-15	1.04962	0.662	0.395	1.04064e-10	3
CG1208.2	1.59792e-14	0.754602	0.448	0.199	1.90616e-10	3
Lpin.2	1.70132e-14	0.707664	0.543	0.267	2.0295e-10	3
cwo.2	1.91624e-14	0.650525	0.852	0.588	2.28588e-10	3
bmm.2	2.65424e-13	0.977923	0.59	0.319	3.16624e-09	3
sra.2	2.9486e-13	0.855298	0.414	0.183	3.51739e-09	3
PDZ-GEF.1	4.98966e-13	0.537591	0.457	0.236	5.95216e-09	3
CG13982	7.34225e-13	1.01822	0.371	0.137	8.75857e-09	3
Atg17.2	8.69794e-13	0.767422	0.562	0.296	1.03758e-08	3
Ser	4.6958e-12	0.507808	0.571	0.326	5.60162e-08	3
uex.2	4.81435e-12	-0.514068	0.576	0.549	5.74304e-08	3
Pdk.2	5.78756e-12	0.712999	0.648	0.388	6.90398e-08	3
CG5953.2	6.08221e-12	0.309978	0.695	0.453	7.25547e-08	3
NimB4.1	6.65098e-12	0.392947	0.586	0.36	7.93395e-08	3
MYPT-75D.1	6.92895e-12	0.878229	0.743	0.503	8.26555e-08	3
CG32486.1	7.44364e-12	0.448067	0.752	0.502	8.87951e-08	3
C1GalTA.2	3.93024e-11	0.436919	0.433	0.244	4.68838e-07	3
CG1943.2	4.47983e-11	0.383536	0.352	0.175	5.34399e-07	3
lbk.2	5.6792e-11	0.629899	0.776	0.548	6.77472e-07	3
Hsc70-4.1	8.06612e-11	-0.575326	0.314	0.289	9.62207e-07	3
Pkn.1	8.95158e-11	0.422686	0.729	0.488	1.06783e-06	3
Myc.1	1.12854e-10	-0.878015	0.462	0.467	1.34623e-06	3
Spn.2	1.58141e-10	0.462651	0.867	0.637	1.88646e-06	3
flfl.2	1.67707e-10	0.399352	0.314	0.159	2.00057e-06	3
CG12054	1.78031e-10	0.289973	0.41	0.237	2.12373e-06	3
mam	2.15633e-10	0.345877	0.571	0.364	2.57229e-06	3
hep	2.19686e-10	0.260589	0.424	0.263	2.62063e-06	3
Fer2LCH.1	3.63716e-10	0.522366	0.752	0.524	4.33877e-06	3
cv-c.2	3.6888e-10	0.366434	0.99	0.909	4.40037e-06	3
CG12065.1	4.23403e-10	0.383442	0.8	0.569	5.05077e-06	3
cpo.1	5.17675e-10	-0.370192	0.776	0.688	6.17534e-06	3
CG46385.2	5.30784e-10	0.52617	0.9	0.722	6.33172e-06	3
CG12163.1	5.35627e-10	0.44897	0.757	0.526	6.38949e-06	3
pcs.2	5.50806e-10	0.272977	0.324	0.181	6.57056e-06	3
sbr.1	5.93969e-10	0.258939	0.405	0.25	7.08546e-06	3
Pdp1.1	7.98775e-10	-0.543295	0.595	0.6	9.52859e-06	3
PRAS40.2	8.54493e-10	0.412201	0.529	0.318	1.01933e-05	3
Crtc.2	8.64584e-10	0.530938	0.729	0.497	1.03136e-05	3
Atg18b.2	9.24639e-10	0.622293	0.424	0.219	1.103e-05	3
Karl	1.38342e-09	0.458184	0.929	0.761	1.65028e-05	3
CG5059.2	1.70155e-09	0.370315	0.519	0.316	2.02978e-05	3
Mbs	2.21797e-09	0.508289	0.576	0.35	2.64582e-05	3
Msp300.1	2.30347e-09	-0.898481	0.5	0.584	2.74781e-05	3
CG12012.2	2.31637e-09	0.39278	0.319	0.166	2.7632e-05	3
RpS26	2.53589e-09	-0.398813	0.295	0.241	3.02506e-05	3
CG6966	2.56285e-09	0.33395	0.424	0.264	3.05723e-05	3
hid.1	2.9686e-09	0.48821	0.557	0.338	3.54124e-05	3
CG4404.2	2.99887e-09	0.516892	0.29	0.143	3.57735e-05	3
REPTOR.2	3.00999e-09	0.431159	0.786	0.562	3.59061e-05	3
kay.1	4.08612e-09	-0.260599	0.495	0.4	4.87433e-05	3
Mob2.2	4.19559e-09	0.565266	0.938	0.821	5.00492e-05	3
CG11050.1	4.39025e-09	0.680356	0.229	0.081	5.23713e-05	3
Sema2b.2	4.68457e-09	0.627136	0.443	0.239	5.58823e-05	3
Eip74EF.2	4.69511e-09	0.460158	0.762	0.55	5.6008e-05	3
Yeti	6.91978e-09	-0.330126	0.362	0.328	8.2546e-05	3
Exn.1	7.51041e-09	0.540975	0.495	0.282	8.95917e-05	3
Trpm.1	8.01261e-09	0.293947	0.619	0.426	9.55824e-05	3
Glut4EF.2	8.16296e-09	0.384226	0.976	0.877	9.73759e-05	3
CG17574.2	8.33731e-09	-0.572718	0.595	0.633	9.94557e-05	3
CG32091.1	9.38428e-09	0.458497	0.833	0.64	0.000111945	3
Socs36E.1	1.01873e-08	-0.801027	0.243	0.24	0.000121524	3
CG31324.2	1.17135e-08	0.646469	0.543	0.32	0.000139731	3
cpx.2	1.19783e-08	-1.0661	0.171	0.226	0.000142889	3
Tis11.1	1.20025e-08	0.311592	0.938	0.78	0.000143178	3
SCaMC.2	1.29809e-08	0.368791	0.438	0.258	0.000154849	3
Sik3	1.66584e-08	0.376075	0.381	0.225	0.000198718	3
Sox14	1.76057e-08	0.478436	0.281	0.142	0.000210019	3
sqd.1	1.82426e-08	-0.338753	0.638	0.57	0.000217616	3
ced-6.1	1.84301e-08	0.373435	0.652	0.448	0.000219852	3
Khc-73.1	1.9584e-08	0.342135	0.452	0.283	0.000233617	3
Cip4.1	2.08251e-08	-0.73902	0.529	0.533	0.000248423	3
CG31689.1	2.21298e-08	0.512483	0.629	0.413	0.000263986	3
Naprt.2	2.21364e-08	0.334169	0.29	0.165	0.000264065	3
gogo.1	2.2648e-08	0.623079	0.348	0.178	0.000270168	3
g.2	2.47369e-08	0.480548	0.314	0.158	0.000295087	3
Jupiter	2.73188e-08	0.284955	0.962	0.819	0.000325886	3
RpL28.1	2.76377e-08	-0.484009	0.371	0.328	0.00032969	3
Cyp6v1	2.76417e-08	0.302722	0.233	0.127	0.000329738	3
CG5151.2	2.83424e-08	-0.519198	0.81	0.794	0.000338096	3
Fas3.2	2.9766e-08	-2.08424	0.095	0.244	0.000355079	3
RpL27A.1	3.10798e-08	-0.936221	0.319	0.389	0.000370751	3
Plp.1	3.17564e-08	-0.271812	0.252	0.209	0.000378822	3
RpL10Ab.1	3.92885e-08	-0.530403	0.281	0.256	0.000468672	3
14-3-3zeta	4.02757e-08	-0.353735	0.39	0.362	0.000480448	3
RpS17.1	4.0465e-08	-0.566154	0.243	0.213	0.000482707	3
Dscam1.1	4.89153e-08	-0.395696	0.29	0.253	0.00058351	3
mnb.2	5.67791e-08	0.622394	0.581	0.36	0.000677318	3
Sap-r.1	5.73058e-08	0.460009	0.614	0.403	0.0006836	3
drpr.1	5.73408e-08	0.389939	0.886	0.729	0.000684018	3
pigs.2	6.21383e-08	-0.269237	0.652	0.57	0.000741248	3
Prps.2	6.66025e-08	0.387119	0.514	0.321	0.000794501	3
Mondo.1	7.29511e-08	0.250336	0.305	0.183	0.000870234	3
scrib	7.60751e-08	-0.705655	0.257	0.319	0.0009075	3
Fer1HCH.1	8.47056e-08	0.293939	0.705	0.509	0.00101045	3
alc.1	8.69549e-08	0.349163	0.414	0.256	0.00103729	3
CG1637	8.90024e-08	0.66531	0.31	0.146	0.00106171	3
rhea.1	8.9851e-08	-0.283866	0.424	0.36	0.00107183	3
AdSS.2	9.10152e-08	0.710756	0.333	0.164	0.00108572	3
CycG.1	9.66377e-08	0.376728	0.886	0.72	0.00115279	3
Svil.1	9.91264e-08	-0.578131	0.424	0.432	0.00118248	3
step.1	1.0076e-07	0.434981	0.595	0.392	0.00120196	3
cno.2	1.0536e-07	0.569723	0.524	0.318	0.00125684	3
GstD1.1	1.1255e-07	-0.678042	0.305	0.276	0.00134261	3
bip2	1.14244e-07	0.41451	0.59	0.398	0.00136281	3
RpS7.1	1.20867e-07	-0.82466	0.252	0.308	0.00144183	3
RpL31	1.23541e-07	-0.659107	0.233	0.258	0.00147372	3
Rab7.2	1.23861e-07	0.393587	0.238	0.116	0.00147754	3
sta	1.33276e-07	-0.590671	0.267	0.277	0.00158984	3
spin.1	1.36413e-07	0.26771	0.557	0.38	0.00162727	3
RpS25	1.41505e-07	-0.527509	0.248	0.233	0.00168801	3
mt:CoI.1	1.42414e-07	-0.740829	0.171	0.202	0.00169886	3
scyl	1.51636e-07	0.257798	0.676	0.485	0.00180887	3
bwa.2	1.55813e-07	0.695129	0.286	0.134	0.00185869	3
Pxn.2	1.58321e-07	-0.669537	0.514	0.548	0.00188862	3
RpL32.1	1.59844e-07	-0.851861	0.233	0.291	0.00190678	3
bin3	1.60918e-07	0.272371	0.3	0.178	0.0019196	3
Mapmodulin.2	1.73588e-07	0.28629	0.286	0.164	0.00207073	3
vir-1.2	1.89687e-07	-0.805145	0.324	0.302	0.00226278	3
Su(z)2	1.9726e-07	0.498668	0.143	0.054	0.00235311	3
CG30046	1.99798e-07	0.361918	0.281	0.161	0.00238339	3
CG13907	2.01289e-07	0.298593	0.314	0.195	0.00240117	3
fax.1	2.01689e-07	0.337173	0.776	0.585	0.00240595	3
jim.2	2.12862e-07	0.542289	0.633	0.423	0.00253923	3
RhoGAP71E.1	2.15494e-07	-0.447853	0.557	0.554	0.00257063	3
CG42542	2.38499e-07	0.478637	0.429	0.249	0.00284505	3
ABCD	2.5597e-07	0.326501	0.357	0.215	0.00305347	3
CG2233	2.58834e-07	-0.96283	0.014	0.117	0.00308763	3
Arc1.1	2.9455e-07	-1.15833	0.129	0.105	0.00351369	3
RhoGAP15B.1	3.10653e-07	0.412189	0.338	0.189	0.00370578	3
unk.2	3.20779e-07	0.351699	0.333	0.198	0.00382657	3
CDase	3.28743e-07	0.435904	0.119	0.041	0.00392158	3
Paip2.2	3.3738e-07	0.572029	0.386	0.213	0.00402461	3
RpL24	3.52417e-07	-0.781852	0.205	0.284	0.00420398	3
mgl.1	3.77311e-07	-1.33801	0.219	0.335	0.00450094	3
RpS18.1	3.99276e-07	-0.339401	0.367	0.306	0.00476296	3
l(3)L1231.1	4.48015e-07	0.329947	0.867	0.702	0.00534437	3
RpL23	4.50034e-07	-0.561894	0.324	0.332	0.00536846	3
CG18135.2	4.63906e-07	0.617395	0.514	0.318	0.00553394	3
RpS9.1	4.66516e-07	-0.353985	0.29	0.239	0.00556507	3
RpS28b.1	4.6993e-07	-0.446749	0.229	0.224	0.0056058	3
RpS8.1	5.01369e-07	-0.405661	0.376	0.321	0.00598083	3
CG42524.2	5.01666e-07	-0.475025	0.343	0.37	0.00598437	3
CG30089.2	5.23786e-07	0.261249	0.538	0.378	0.00624825	3
SREBP.2	5.92608e-07	0.307792	0.281	0.162	0.00706922	3
Drat.2	5.93514e-07	0.310627	0.305	0.175	0.00708003	3
Dmtn	6.31474e-07	0.327814	0.476	0.307	0.00753285	3
Mur2B	6.38686e-07	0.256812	0.643	0.461	0.00761888	3
RpL23A	6.90207e-07	-0.485206	0.19	0.172	0.00823348	3
CHES-1-like.2	7.95743e-07	0.30493	0.505	0.35	0.00949242	3
CG15309	8.33487e-07	0.316732	0.21	0.112	0.00994266	3
CG34331	8.34206e-07	0.272485	0.214	0.115	0.00995124	3
lap.1	9.65242e-07	0.291217	0.571	0.406	0.0115144	3
Act5C.2	1.05099e-06	-0.718492	0.319	0.373	0.0125373	3
Haspin.1	1.08117e-06	-0.263881	0.252	0.227	0.0128973	3
wake.2	1.15881e-06	-0.717902	0.395	0.44	0.0138234	3
CG17754.1	1.21895e-06	0.352825	0.252	0.147	0.0145409	3
Idh.1	1.32201e-06	0.470715	0.257	0.127	0.0157702	3
MCPH1.1	1.43801e-06	0.299774	0.248	0.139	0.017154	3
CG1578.1	1.50131e-06	0.303398	0.395	0.25	0.0179092	3
Vha100-2.2	1.63242e-06	-0.290233	0.243	0.221	0.0194732	3
CG4080	1.73406e-06	0.453273	0.643	0.455	0.0206856	3
spg.2	1.78027e-06	0.279329	0.224	0.127	0.0212368	3
slpr.1	1.79322e-06	0.482028	0.229	0.114	0.0213913	3
CG4911	1.80667e-06	0.308791	0.238	0.133	0.0215517	3
Hipk	1.97125e-06	0.34137	0.714	0.526	0.023515	3
Btk29A.2	2.0057e-06	0.308511	0.89	0.752	0.023926	3
CG5080.2	2.16638e-06	0.529087	0.676	0.492	0.0258428	3
Drak.2	2.20212e-06	-0.481049	0.495	0.51	0.0262691	3
galla-1.1	2.27954e-06	0.319554	0.2	0.101	0.0271927	3
hzg.1	2.37723e-06	-0.369599	0.176	0.168	0.028358	3
Ald1.1	2.55037e-06	-0.509622	0.352	0.333	0.0304234	3
Gdh.1	2.61682e-06	0.448072	0.176	0.069	0.0312161	3
Vha100-1	2.62899e-06	0.253452	0.2	0.111	0.0313612	3
RpL34b	2.75708e-06	-0.577258	0.21	0.219	0.0328892	3
px.1	2.89053e-06	0.250846	0.9	0.753	0.0344812	3
nmo	2.89466e-06	-0.269589	0.305	0.256	0.0345304	3
CG10082.1	3.14387e-06	0.375695	0.41	0.254	0.0375033	3
spir.1	3.15755e-06	-0.411064	0.495	0.447	0.0376664	3
cdi.1	3.24349e-06	-0.506936	0.3	0.3	0.0386916	3
CG9701.2	3.39214e-06	0.770959	0.2	0.083	0.0404648	3
sm	3.4558e-06	-0.335147	0.276	0.236	0.0412242	3
Drs	3.85712e-06	-1.05291	0.095	0.12	0.0460116	3
CG2201	3.95899e-06	-0.454333	0.124	0.133	0.0472267	3
COX6B	3.9888e-06	-0.365549	0.129	0.117	0.0475824	3
Dyrk2.1	4.05072e-06	0.451671	0.719	0.536	0.0483211	3
sky.1	4.09656e-06	0.276816	0.786	0.62	0.0488679	3
flw.2	4.15041e-06	-0.697295	0.319	0.364	0.0495103	3
eEF1alpha1.2	4.87226e-15	0.936513	0.582	0.512	5.81211e-11	4
Mst84Da.2	2.4736e-14	1.40179	0.328	0.132	2.95076e-10	4
CG2233.1	1.03997e-13	1.70921	0.269	0.072	1.24057e-09	4
Ppn.1	1.74852e-13	0.573813	1	0.96	2.08581e-09	4
RpL31.1	7.31145e-13	1.02603	0.353	0.237	8.72183e-09	4
RpS25.1	8.20121e-12	1.23039	0.398	0.207	9.78322e-08	4
RpS27.2	8.9579e-12	1.04673	0.433	0.291	1.06859e-07	4
Inos	2.30089e-11	0.934065	0.647	0.496	2.74473e-07	4
RpL35A.2	3.18782e-11	1.0651	0.348	0.197	3.80275e-07	4
RpL10Ab.2	3.98943e-11	1.04183	0.398	0.236	4.759e-07	4
RpL8.1	1.17371e-10	1.00221	0.388	0.25	1.40011e-06	4
RpS13	2.39989e-10	1.00356	0.343	0.223	2.86283e-06	4
Eip93F	2.59885e-10	-0.418309	0.985	0.994	3.10017e-06	4
Obp99c.1	5.74794e-10	1.19126	0.219	0.101	6.85672e-06	4
eEF2.3	1.36016e-09	0.864967	0.438	0.293	1.62254e-05	4
RpL21.3	1.76299e-09	0.980993	0.373	0.258	2.10307e-05	4
InR.3	1.89802e-09	-0.753365	0.786	0.865	2.26415e-05	4
cathD	1.9278e-09	0.942481	0.284	0.206	2.29968e-05	4
RpL28.2	2.10001e-09	0.84864	0.393	0.325	2.5051e-05	4
lilli	4.84093e-09	-0.401833	0.522	0.745	5.77475e-05	4
CG42788.1	5.47509e-09	0.560931	0.249	0.273	6.53124e-05	4
RpL36.1	8.42526e-09	0.833489	0.338	0.27	0.000100505	4
RpL27A.2	9.8246e-09	0.951674	0.488	0.359	0.000117198	4
Desat1	1.0982e-08	1.25922	0.299	0.123	0.000131004	4
CG14245.2	1.28376e-08	1.48861	0.184	0.122	0.00015314	4
Cyp4g1	1.54152e-08	1.60196	0.388	0.216	0.000183888	4
mt:CoI.2	1.97807e-08	0.895754	0.269	0.185	0.000235964	4
RpL7.1	2.21118e-08	0.7877	0.284	0.237	0.000263771	4
RpL14.1	3.06616e-08	0.95057	0.393	0.293	0.000365762	4
RpL26.1	3.62558e-08	0.825927	0.358	0.258	0.000432496	4
RpL11.1	3.818e-08	0.9154	0.284	0.181	0.000455449	4
RpS18.2	3.84854e-08	0.835421	0.418	0.298	0.000459092	4
RpLP2.1	4.0856e-08	0.933669	0.299	0.185	0.000487371	4
RpS17.2	4.52995e-08	0.95645	0.274	0.208	0.000540378	4
RpS4.1	4.5658e-08	0.930327	0.299	0.194	0.000544654	4
RpL32.2	5.43431e-08	0.80031	0.353	0.27	0.000648259	4
RpS28b.2	5.74933e-08	0.789266	0.294	0.213	0.000685838	4
RpS9.2	6.46957e-08	0.86632	0.353	0.229	0.000771755	4
Mst57Db.1	6.93591e-08	0.975358	0.239	0.132	0.000827384	4
RpL37A.2	7.4503e-08	0.905939	0.264	0.183	0.000888746	4
CG7766.1	1.00007e-07	0.461149	0.159	0.151	0.00119298	4
CG16758.2	1.36873e-07	0.965261	0.224	0.083	0.00163276	4
CG3662	1.43311e-07	0.469142	0.348	0.342	0.00170955	4
RpL15.2	1.47886e-07	0.782978	0.383	0.301	0.00176414	4
CG3124	1.58527e-07	0.900603	0.134	0.041	0.00189106	4
RpL35.2	1.66485e-07	0.885004	0.303	0.207	0.001986	4
awd.1	1.80105e-07	0.749329	0.154	0.11	0.00214848	4
CG31226	1.88618e-07	1.03603	0.154	0.07	0.00225003	4
CG46059	1.99638e-07	0.924621	0.129	0.058	0.00238148	4
lcs.1	2.00325e-07	1.10696	0.299	0.179	0.00238968	4
RpL27.2	2.07639e-07	0.822917	0.323	0.255	0.00247693	4
hppy.1	2.32338e-07	-0.440018	0.418	0.612	0.00277156	4
RpS10b.1	2.64324e-07	0.926698	0.358	0.225	0.00315312	4
RpS29.1	2.7945e-07	0.957249	0.303	0.187	0.00333356	4
Got2.1	2.89262e-07	0.854939	0.149	0.081	0.00345061	4
CG1648.2	3.17249e-07	1.33186	0.144	0.131	0.00378446	4
Fas3.3	3.23372e-07	-1.91054	0.09	0.243	0.00385751	4
CG6503.1	3.75639e-07	0.603863	0.129	0.03	0.004481	4
NimB2	4.76586e-07	0.583198	0.274	0.236	0.0056852	4
RpL41	4.87535e-07	0.862004	0.428	0.266	0.0058158	4
RpS21.2	4.90893e-07	0.95558	0.373	0.229	0.00585587	4
CG42674.2	5.44345e-07	-1.26018	0.025	0.137	0.00649349	4
RpLP1.2	6.09784e-07	0.957366	0.338	0.221	0.00727411	4
CG5080.3	7.80661e-07	0.64708	0.567	0.512	0.00931251	4
GEFmeso.2	8.33271e-07	-0.728258	0.279	0.463	0.00994009	4
RpL13	9.81688e-07	0.734919	0.313	0.24	0.0117106	4
SPARC.1	1.177e-06	0.539156	0.612	0.504	0.0140405	4
RpL39	1.32585e-06	0.905873	0.299	0.21	0.015816	4
lectin-24Db.2	1.34314e-06	0.590311	0.154	0.13	0.0160223	4
RpS2	1.38782e-06	0.785997	0.294	0.179	0.0165553	4
spir.2	1.44225e-06	-0.927837	0.289	0.483	0.0172046	4
RpS30.2	1.44641e-06	0.856449	0.333	0.218	0.0172543	4
hid.2	1.79575e-06	-0.81619	0.219	0.398	0.0214215	4
RpS3.1	1.80015e-06	0.805112	0.264	0.176	0.0214739	4
ocn	1.81321e-06	0.958231	0.129	0.059	0.0216298	4
ATPsynD	1.87705e-06	0.745081	0.129	0.069	0.0223913	4
BG642312	2.07909e-06	1.00668	0.139	0.061	0.0248015	4
bun.2	2.21408e-06	-0.543298	0.741	0.856	0.0264117	4
Mob2.3	2.32524e-06	-0.561323	0.736	0.857	0.0277378	4
Fim.1	2.33598e-06	-0.785864	0.219	0.393	0.0278659	4
prage.3	2.44285e-06	-1.06954	0.149	0.316	0.0291408	4
ACC.1	2.45412e-06	0.906031	0.189	0.128	0.0292752	4
RpL3.2	2.59607e-06	0.720432	0.328	0.25	0.0309686	4
msi.1	2.8045e-06	-0.455198	0.786	0.866	0.0334549	4
eEF1beta	2.98754e-06	0.781371	0.189	0.115	0.0356384	4
Hml.3	3.02478e-06	0.490049	0.776	0.629	0.0360826	4
MtnA.2	3.14708e-06	0.802305	0.388	0.278	0.0375415	4
Ance-5.1	3.2326e-06	0.678788	0.204	0.142	0.0385616	4
Diap1	3.56631e-06	-0.673538	0.308	0.491	0.0425426	4
RpL7A	3.6421e-06	0.619031	0.323	0.261	0.0434466	4
Abl	3.76246e-06	-0.642104	0.542	0.718	0.0448824	4
CG12581	4.1051e-64	2.82074	0.449	0.018	4.89697e-60	5
CG17839.4	2.68088e-58	3.19678	0.52	0.05	3.19802e-54	5
dpy	2.72818e-38	3.22235	0.313	0.015	3.25444e-34	5
grh	9.7027e-38	2.31071	0.313	0.018	1.15743e-33	5
mgl.3	2.10564e-37	2.20248	0.667	0.258	2.51182e-33	5
Fas2	4.5382e-30	2.24366	0.308	0.031	5.41362e-26	5
CG8740.2	9.08859e-30	1.9875	0.348	0.045	1.08418e-25	5
jbug	2.31992e-28	1.9444	0.212	0.006	2.76743e-24	5
hth.1	4.79089e-27	2.35618	0.323	0.051	5.71506e-23	5
pyd.3	8.06655e-26	2.15196	0.333	0.059	9.62259e-22	5
Tie	3.03558e-25	1.97087	0.217	0.018	3.62115e-21	5
ELOVL	6.36896e-25	2.49057	0.202	0.009	7.59753e-21	5
CG11073	8.20212e-25	1.62162	0.187	0.008	9.78431e-21	5
Cda5	1.22895e-24	1.88911	0.207	0.012	1.46601e-20	5
form3	1.80079e-24	2.10059	0.212	0.011	2.14816e-20	5
ed.3	7.6202e-24	1.70717	0.505	0.166	9.09013e-20	5
CG8180	1.55505e-23	1.95937	0.192	0.007	1.85502e-19	5
siz.2	7.34664e-23	1.61457	0.424	0.112	8.7638e-19	5
Dys.4	1.10975e-22	1.68648	0.439	0.124	1.32382e-18	5
Fas3.4	1.4016e-21	0.74004	0.51	0.172	1.67197e-17	5
crb	1.92463e-21	1.86125	0.247	0.029	2.29589e-17	5
pdm3	7.40924e-21	1.98931	0.172	0.009	8.83849e-17	5
vvl	5.18279e-20	1.64884	0.227	0.027	6.18256e-16	5
CG33970	7.52353e-20	2.47638	0.177	0.009	8.97482e-16	5
CG30460	8.12443e-20	1.79894	0.232	0.031	9.69163e-16	5
CG6040	2.37964e-19	1.63768	0.227	0.027	2.83868e-15	5
snu	6.46503e-19	1.56896	0.202	0.027	7.71213e-15	5
CG6959	9.00339e-19	1.46401	0.237	0.036	1.07401e-14	5
Nost	9.12294e-19	1.68107	0.258	0.039	1.08828e-14	5
CG34398	1.38346e-18	2.00996	0.187	0.015	1.65033e-14	5
ASPP	1.71419e-18	1.55009	0.187	0.015	2.04486e-14	5
CG34120	1.72723e-18	2.11789	0.177	0.015	2.06041e-14	5
CG33110	1.83692e-18	1.82893	0.167	0.009	2.19127e-14	5
RhoGEF64C	1.00839e-17	1.86715	0.146	0.006	1.2029e-13	5
stw	1.39344e-17	1.67895	0.197	0.022	1.66223e-13	5
CG32521.1	2.47527e-17	1.66953	0.308	0.075	2.95275e-13	5
Lmpt.3	4.80361e-17	1.78452	0.323	0.081	5.73023e-13	5
CG12814	1.71514e-16	1.52892	0.187	0.018	2.04599e-12	5
sick.2	2.06854e-16	1.77174	0.298	0.07	2.46756e-12	5
Hpd	2.19218e-16	1.91712	0.172	0.019	2.61505e-12	5
CG9628	2.81855e-16	1.31158	0.192	0.026	3.36225e-12	5
bru2	2.83753e-16	1.58655	0.237	0.045	3.3849e-12	5
Wdr62.1	5.02584e-16	1.05558	0.631	0.414	5.99533e-12	5
CG4928	6.79161e-16	1.95023	0.222	0.06	8.10171e-12	5
nahoda	8.30149e-16	1.32408	0.131	0.007	9.90285e-12	5
CG32694	1.37831e-15	1.66293	0.141	0.013	1.64418e-11	5
CG3655	1.535e-15	1.52641	0.187	0.022	1.83111e-11	5
ovo	2.10768e-15	1.42746	0.131	0.007	2.51425e-11	5
CG41520.1	2.30749e-15	1.60384	0.424	0.175	2.7526e-11	5
sv	1.12669e-14	1.82048	0.116	0.006	1.34403e-10	5
toc.4	1.71562e-14	1.50652	0.268	0.069	2.04656e-10	5
rdgA.1	2.09996e-14	1.26325	0.359	0.119	2.50504e-10	5
CG32137	2.58863e-14	1.34005	0.177	0.021	3.08798e-10	5
CG43759	4.03637e-14	1.49044	0.146	0.015	4.81498e-10	5
sprt	4.19949e-14	1.3805	0.146	0.013	5.00957e-10	5
Best2	4.96631e-14	1.13091	0.157	0.017	5.92431e-10	5
Msr-110	5.1545e-14	1.94218	0.227	0.061	6.1488e-10	5
bi	7.7046e-14	1.91042	0.106	0.004	9.19081e-10	5
Ets98B	7.97165e-14	1.26189	0.162	0.019	9.50938e-10	5
dnr1	1.00507e-13	1.70324	0.182	0.033	1.19895e-09	5
CG2841	1.14075e-13	1.51224	0.141	0.013	1.3608e-09	5
Kank	1.23898e-13	1.38086	0.167	0.025	1.47798e-09	5
sdt	1.86377e-13	1.34877	0.242	0.052	2.22329e-09	5
CG31176	4.56174e-13	1.98079	0.121	0.009	5.4417e-09	5
Gs2.1	6.60325e-13	1.36958	0.348	0.124	7.87702e-09	5
Ptp10D	2.14118e-12	1.36668	0.232	0.055	2.55421e-08	5
CG14830	2.32011e-12	1.09475	0.101	0.006	2.76766e-08	5
pio	2.70092e-12	1.18731	0.116	0.009	3.22193e-08	5
bowl	2.87114e-12	1.08745	0.121	0.009	3.42498e-08	5
Sp1	4.05389e-12	1.24642	0.106	0.007	4.83589e-08	5
CG17834	4.64087e-12	1.5538	0.141	0.02	5.53609e-08	5
Amph	1.59639e-11	1.36995	0.232	0.057	1.90434e-07	5
CG6398	1.79382e-11	1.15822	0.126	0.014	2.13985e-07	5
CG3168.1	2.04586e-11	1.32411	0.253	0.084	2.44051e-07	5
osp	2.72861e-11	1.25999	0.212	0.052	3.25496e-07	5
CG6409.1	5.27019e-11	1.28923	0.192	0.077	6.28681e-07	5
caps.3	6.64519e-11	1.12616	0.263	0.076	7.92704e-07	5
CG32264.3	1.13925e-10	0.854978	0.652	0.411	1.35901e-06	5
Rbp6	1.61224e-10	1.90262	0.182	0.057	1.92324e-06	5
kmr	1.7886e-10	1.06055	0.136	0.021	2.13362e-06	5
sog	2.00833e-10	1.35304	0.187	0.039	2.39574e-06	5
cpo.2	3.42218e-10	0.735926	0.833	0.679	4.08231e-06	5
CG8312.1	5.7899e-10	1.00422	0.616	0.414	6.90678e-06	5
Fas1	7.27037e-10	0.92602	0.182	0.039	8.67283e-06	5
GstT4	1.40436e-09	1.13129	0.202	0.051	1.67527e-05	5
CG42327	1.51367e-09	1.14866	0.141	0.024	1.80566e-05	5
zormin	1.85943e-09	1.01624	0.136	0.024	2.21811e-05	5
CG11147	2.08895e-09	1.06382	0.126	0.018	2.49191e-05	5
cv-2.1	2.34796e-09	1.73346	0.207	0.065	2.80088e-05	5
chas	2.48707e-09	1.02496	0.111	0.011	2.96682e-05	5
bbg	3.82177e-09	1.27223	0.121	0.021	4.55898e-05	5
scrib.1	4.59866e-09	0.921579	0.48	0.28	5.48575e-05	5
CG42673	4.67128e-09	1.34895	0.111	0.015	5.57237e-05	5
Nrg.4	6.9486e-09	0.703995	0.293	0.116	8.28898e-05	5
Msp300.2	1.37609e-08	0.923033	0.697	0.55	0.000164154	5
nrm	1.40598e-08	1.02508	0.101	0.013	0.000167719	5
Pura	1.54612e-08	1.0619	0.106	0.014	0.000184436	5
CenG1A.1	2.10273e-08	0.993543	0.293	0.145	0.000250835	5
Ddc	2.2254e-08	0.940643	0.106	0.014	0.000265468	5
EbpIII	2.58154e-08	1.13477	0.177	0.07	0.000307952	5
fng	3.50382e-08	1.08393	0.101	0.016	0.00041797	5
CG7378	3.83423e-08	1.13054	0.116	0.019	0.000457385	5
csw	3.91705e-08	0.97128	0.394	0.234	0.000467264	5
bab2	5.09493e-08	1.2617	0.116	0.027	0.000607774	5
SPoCk	5.57196e-08	1.0682	0.172	0.057	0.000664679	5
sima	6.3831e-08	0.568788	0.859	0.78	0.00076144	5
Gp150	7.72045e-08	0.8535	0.187	0.061	0.000920972	5
emp	8.53188e-08	0.966752	0.131	0.033	0.00101777	5
pum.1	1.99862e-07	-0.339908	0.99	0.995	0.00238415	5
fus	2.06876e-07	0.747376	0.141	0.035	0.00246782	5
Egfr	2.23152e-07	0.983595	0.182	0.053	0.00266198	5
Hex-A.1	2.50151e-07	0.864696	0.439	0.261	0.00298405	5
T48	2.70326e-07	1.04252	0.167	0.046	0.00322472	5
how.1	2.98273e-07	1.01506	0.434	0.257	0.00355809	5
plx	3.26176e-07	0.924243	0.121	0.026	0.00389096	5
dally	4.98796e-07	1.33983	0.136	0.04	0.00595014	5
sm.1	5.99403e-07	0.984189	0.359	0.222	0.00715027	5
Bx	7.93654e-07	0.994245	0.157	0.043	0.0094675	5
rols	1.22845e-06	0.998404	0.101	0.022	0.0146542	5
jing.2	1.33169e-06	0.856601	0.343	0.172	0.0158857	5
msn.1	2.20275e-06	-0.527843	0.813	0.895	0.0262766	5
tna.3	2.47755e-06	0.5018	0.374	0.196	0.0295547	5
Eaat1	3.07209e-06	0.83179	0.111	0.028	0.0366469	5
ex	3.10131e-06	0.873113	0.172	0.067	0.0369955	5
ps	3.6905e-06	0.338216	0.98	0.913	0.044024	5
Cip4.4	1.5311e-79	2.31199	0.89	0.481	1.82645e-75	6
luna.3	4.60319e-61	1.63597	0.983	0.779	5.49115e-57	6
spir.3	1.25337e-60	2.17209	0.919	0.388	1.49514e-56	6
Myo31DF.4	2.53539e-53	2.69465	0.692	0.154	3.02447e-49	6
mamo.1	4.07638e-42	-1.76135	0.488	0.901	4.86272e-38	6
Myc.2	7.17863e-42	1.94282	0.767	0.423	8.56339e-38	6
cher.3	1.42093e-41	2.68603	0.465	0.052	1.69503e-37	6
Fas3.5	6.39473e-41	3.15326	0.576	0.169	7.62827e-37	6
Act5C.3	1.59756e-40	2.02419	0.733	0.312	1.90573e-36	6
AnxB9.3	4.91408e-40	2.10126	0.721	0.268	5.86201e-36	6
MCU.3	1.11071e-38	2.58288	0.442	0.053	1.32497e-34	6
Dscam1.4	3.02429e-34	2.00733	0.628	0.206	3.60768e-30	6
Ppn.2	5.51029e-32	-1.17442	0.884	0.977	6.57323e-28	6
RhoGAP71E.3	1.18757e-31	1.53263	0.814	0.517	1.41665e-27	6
fog.3	7.23743e-31	-1.79986	0.262	0.697	8.63353e-27	6
Col4a1.2	1.36922e-30	-1.10323	0.797	0.943	1.63335e-26	6
Pgant9.1	1.63953e-30	-1.67633	0.349	0.756	1.95579e-26	6
Spn.3	2.14687e-30	-1.82906	0.302	0.726	2.56101e-26	6
Btk29A.4	3.76891e-30	-1.62764	0.453	0.82	4.49594e-26	6
Naam.2	1.49705e-29	2.08395	0.587	0.203	1.78583e-25	6
CG6891.1	7.77679e-29	2.06918	0.355	0.048	9.27693e-25	6
Mmp2.4	4.23778e-27	1.65204	0.779	0.415	5.05524e-23	6
CG12991.1	7.25115e-27	2.09273	0.343	0.043	8.64989e-23	6
Pxn.3	8.631e-27	-2.36255	0.198	0.592	1.02959e-22	6
GEFmeso.3	1.6487e-26	1.43038	0.75	0.39	1.96673e-22	6
MYPT-75D.2	2.88817e-26	-2.13412	0.18	0.592	3.4453e-22	6
mys.2	5.00646e-26	1.49755	0.698	0.355	5.97221e-22	6
CG3726.1	5.75442e-26	-1.56156	0.279	0.693	6.86445e-22	6
CG15673	6.29035e-26	2.01098	0.32	0.034	7.50375e-22	6
Pvr.3	9.34736e-26	-1.06958	0.663	0.909	1.11505e-21	6
stac	2.66665e-25	1.97701	0.331	0.044	3.18105e-21	6
aqz.1	2.8008e-25	-1.23077	0.738	0.92	3.34108e-21	6
Men-b.3	3.26028e-25	2.00983	0.378	0.063	3.88918e-21	6
CG5399	7.02634e-25	2.20458	0.337	0.044	8.38173e-21	6
px.2	7.41087e-25	-1.31098	0.541	0.81	8.84042e-21	6
mtd.2	8.32784e-25	-1.39409	0.517	0.794	9.93428e-21	6
Sema2a.3	1.38396e-24	-2.40216	0.11	0.496	1.65093e-20	6
rhea.3	1.6116e-24	1.53508	0.64	0.331	1.92248e-20	6
Ae2.2	2.62213e-24	1.95716	0.494	0.158	3.12793e-20	6
Pax.2	1.84651e-23	1.70452	0.541	0.185	2.2027e-19	6
CG31145.2	1.06466e-22	-1.3578	0.488	0.782	1.27003e-18	6
Fim.3	1.16263e-22	1.52397	0.68	0.322	1.3869e-18	6
loco.2	1.80589e-22	2.00787	0.39	0.086	2.15425e-18	6
CG43867.2	1.91541e-22	2.01792	0.448	0.123	2.28489e-18	6
Xrp1.2	2.33385e-22	1.33893	0.919	0.678	2.78405e-18	6
schlank.2	4.31833e-22	1.85107	0.407	0.097	5.15133e-18	6
Prosap.1	1.21251e-21	-0.590107	0.808	0.966	1.4464e-17	6
Inos.2	2.61893e-21	-1.81967	0.186	0.566	3.12412e-17	6
wge.3	6.65236e-21	1.59009	0.512	0.172	7.9356e-17	6
pyr	9.66479e-21	2.28196	0.262	0.033	1.15291e-16	6
sr.1	1.48828e-20	-1.66502	0.25	0.576	1.77537e-16	6
cic.1	2.03427e-20	-1.06148	0.884	0.966	2.42668e-16	6
vir-1.3	3.73345e-20	1.91633	0.581	0.266	4.45363e-16	6
lola	5.86201e-20	-0.797334	0.843	0.956	6.99279e-16	6
CG40006.1	5.99537e-20	-1.25711	0.308	0.663	7.15187e-16	6
vkg.2	7.86414e-20	-1.16982	0.57	0.845	9.38113e-16	6
CG5004.3	7.98471e-20	1.70909	0.331	0.062	9.52497e-16	6
Hml.4	1.04528e-19	-1.45928	0.355	0.694	1.24692e-15	6
TotM	4.14848e-19	2.95184	0.227	0.025	4.94872e-15	6
fax.3	5.98604e-19	1.141	0.843	0.581	7.14074e-15	6
betaTub60D.4	6.1997e-19	1.70081	0.529	0.215	7.39562e-15	6
Cam.2	9.2468e-19	1.36539	0.733	0.478	1.10305e-14	6
scb.2	1.26319e-18	1.66172	0.413	0.112	1.50686e-14	6
Socs36E.2	1.53115e-18	1.8085	0.448	0.211	1.82651e-14	6
Gadd45.2	3.38024e-18	1.89972	0.395	0.108	4.03228e-14	6
cdi.2	1.19541e-17	1.3535	0.576	0.26	1.426e-13	6
gce.2	1.56507e-17	-1.45165	0.262	0.583	1.86697e-13	6
CD98hc.1	1.65218e-17	1.53498	0.297	0.06	1.97089e-13	6
Sr-CI.2	1.76307e-17	-1.4384	0.297	0.619	2.10317e-13	6
Rtnl1.2	3.83462e-17	1.57606	0.349	0.087	4.57432e-13	6
kek1.1	5.07958e-17	1.92638	0.471	0.212	6.05943e-13	6
CG9328.1	5.46908e-17	-1.64372	0.192	0.522	6.52407e-13	6
CG17760.1	8.5086e-17	1.81733	0.297	0.064	1.01499e-12	6
Eb1.2	1.04744e-16	1.28132	0.57	0.288	1.24949e-12	6
CG32486.3	1.11012e-16	-1.36635	0.273	0.579	1.32427e-12	6
CG42674.4	2.54484e-16	1.70259	0.331	0.09	3.03574e-12	6
Abl.2	2.6339e-16	1.12287	0.826	0.673	3.14197e-12	6
CG1572	4.94988e-16	1.46661	0.291	0.057	5.90471e-12	6
Ac76E.2	6.87506e-16	1.48226	0.424	0.144	8.20125e-12	6
Hsp83.2	1.13613e-15	1.56604	0.663	0.369	1.35529e-11	6
bbc.2	1.36601e-15	1.46141	0.471	0.19	1.62951e-11	6
Nrg.5	1.90494e-15	1.94367	0.337	0.113	2.27241e-11	6
regucalcin.5	2.46165e-15	-1.50306	0.221	0.534	2.9365e-11	6
Myo61F	3.44149e-15	1.51123	0.244	0.046	4.10536e-11	6
alphaTub84B.2	4.23814e-15	1.50119	0.488	0.201	5.05567e-11	6
CG12163.2	6.89189e-15	-1.2742	0.297	0.6	8.22134e-11	6
chic.1	7.51108e-15	1.0424	0.64	0.328	8.95997e-11	6
Frl.1	1.18624e-14	1.19389	0.587	0.367	1.41506e-10	6
foxo.1	1.45156e-14	-1.22076	0.297	0.589	1.73157e-10	6
tai.2	2.10198e-14	-0.827653	0.692	0.839	2.50746e-10	6
CG6006.2	3.82759e-14	1.62439	0.349	0.125	4.56593e-10	6
srp.1	3.88345e-14	-0.585436	0.797	0.93	4.63256e-10	6
Shrm.1	5.34805e-14	0.941584	0.227	0.049	6.37969e-10	6
lectin-28C.3	6.0787e-14	-1.21322	0.384	0.666	7.25129e-10	6
Imp.3	6.94383e-14	0.980014	0.709	0.414	8.28329e-10	6
Arc1.2	7.75948e-14	2.23969	0.285	0.083	9.25629e-10	6
Galphai.2	9.20182e-14	1.24871	0.488	0.227	1.09768e-09	6
GlcAT-P.2	1.07406e-13	-1.19968	0.262	0.57	1.28125e-09	6
Ten-m.3	1.65848e-13	-0.507923	0.994	0.996	1.9784e-09	6
CG7120.3	2.05492e-13	-1.40931	0.209	0.497	2.45132e-09	6
capu.2	4.09561e-13	1.48944	0.413	0.169	4.88565e-09	6
CG31523.2	4.10017e-13	1.32204	0.413	0.148	4.89109e-09	6
zfh1.2	4.21483e-13	-0.637998	0.773	0.933	5.02787e-09	6
LamC	4.81343e-13	1.20315	0.244	0.049	5.74194e-09	6
fz2.1	1.01817e-12	-1.19767	0.273	0.555	1.21458e-08	6
RhoGAP18B.1	1.13011e-12	1.16387	0.599	0.362	1.34811e-08	6
KrT95D.3	1.24836e-12	1.34683	0.506	0.279	1.48917e-08	6
Sema5c.2	1.66565e-12	-1.42558	0.285	0.544	1.98696e-08	6
CG10543.1	2.12557e-12	-0.976748	0.57	0.76	2.53559e-08	6
Pkn.2	2.17726e-12	-1.17153	0.297	0.558	2.59726e-08	6
LRR.1	2.62115e-12	0.978016	0.738	0.482	3.12677e-08	6
psq.2	2.99602e-12	-0.738036	0.657	0.843	3.57395e-08	6
Pde9.1	3.06422e-12	-1.2428	0.395	0.623	3.65531e-08	6
CG5953.4	3.69683e-12	1.24816	0.709	0.459	4.40995e-08	6
pan.2	4.26133e-12	-0.889093	0.669	0.744	5.08335e-08	6
spin.2	5.05818e-12	0.934309	0.663	0.371	6.0339e-08	6
rudhira.2	5.43411e-12	-1.09359	0.343	0.607	6.48235e-08	6
CG10126	5.55525e-12	1.17433	0.227	0.047	6.62686e-08	6
Fit1.1	6.46207e-12	1.38301	0.273	0.077	7.70861e-08	6
l(3)L1231.2	7.54857e-12	-0.938199	0.552	0.753	9.00469e-08	6
mew.2	7.54875e-12	-0.687276	0.686	0.859	9.0049e-08	6
norpA.1	8.7829e-12	0.95488	0.692	0.411	1.04771e-07	6
Lk6.2	9.20384e-12	-0.960189	0.593	0.742	1.09793e-07	6
CG32091.3	1.88796e-11	-0.937136	0.483	0.696	2.25215e-07	6
Glut4EF.4	2.04081e-11	-0.843889	0.797	0.906	2.43448e-07	6
hid.3	2.04591e-11	-1.50151	0.157	0.403	2.44057e-07	6
sdk.3	2.87245e-11	1.11295	0.61	0.378	3.42655e-07	6
Snoo	3.23138e-11	-0.97782	0.419	0.647	3.85471e-07	6
CG15145	3.41701e-11	1.44435	0.203	0.037	4.07615e-07	6
r-l	3.72671e-11	1.06207	0.128	0.009	4.44559e-07	6
CCT2	3.80533e-11	1.05558	0.221	0.049	4.53938e-07	6
pain	3.84505e-11	1.43078	0.203	0.038	4.58676e-07	6
Mmp1	4.102e-11	1.52666	0.186	0.032	4.89328e-07	6
GstD3	4.55026e-11	1.54814	0.227	0.055	5.428e-07	6
CG5346.1	4.91686e-11	0.886309	0.215	0.053	5.86532e-07	6
jim.3	5.12096e-11	-1.21889	0.262	0.483	6.1088e-07	6
gpp.1	5.75395e-11	-0.747446	0.599	0.789	6.86389e-07	6
Baldspot.1	1.04809e-10	1.20202	0.343	0.117	1.25026e-06	6
puc.2	1.21672e-10	0.888059	0.721	0.524	1.45143e-06	6
Doa.2	1.22787e-10	1.08519	0.628	0.448	1.46473e-06	6
Smr.1	1.54662e-10	-0.659198	0.738	0.873	1.84497e-06	6
pum.2	1.67913e-10	-0.360255	0.977	0.997	2.00304e-06	6
coro	1.83492e-10	1.26955	0.238	0.063	2.18888e-06	6
l(2)41Ab.1	2.23893e-10	-1.03651	0.471	0.689	2.67082e-06	6
CG9253	2.58891e-10	0.78144	0.14	0.02	3.08831e-06	6
dl.3	2.78724e-10	1.37516	0.314	0.104	3.3249e-06	6
msk	2.82591e-10	0.967967	0.227	0.055	3.37103e-06	6
CG44325.2	2.96069e-10	1.10253	0.419	0.171	3.53181e-06	6
gogo.2	3.05046e-10	-1.63952	0.041	0.227	3.6389e-06	6
Hsp27.1	3.22879e-10	3.00794	0.192	0.105	3.85162e-06	6
CG31955	5.03159e-10	0.972653	0.134	0.016	6.00219e-06	6
vari.2	5.77502e-10	1.18442	0.395	0.157	6.88902e-06	6
GstD1.2	6.62751e-10	1.41457	0.407	0.263	7.90595e-06	6
Act42A.3	8.13065e-10	1.07975	0.372	0.144	9.69905e-06	6
Nop60B	1.01678e-09	1.10454	0.192	0.041	1.21291e-05	6
fru	1.04127e-09	1.09314	0.203	0.049	1.24213e-05	6
RhoL	1.11007e-09	1.08123	0.302	0.105	1.3242e-05	6
CG3961.2	1.46914e-09	-1.19446	0.163	0.404	1.75254e-05	6
CG13384.2	1.52357e-09	1.038	0.407	0.194	1.81747e-05	6
CG17646.2	2.81509e-09	1.09595	0.529	0.333	3.35812e-05	6
ced-6.2	2.9134e-09	-0.988868	0.256	0.512	3.47539e-05	6
Traf4.1	3.03589e-09	-1.35065	0.093	0.299	3.62151e-05	6
EDTP.3	3.04698e-09	-1.41868	0.058	0.229	3.63475e-05	6
Ets21C	3.33978e-09	1.27834	0.267	0.087	3.98402e-05	6
Drp1	3.52825e-09	0.7549	0.151	0.03	4.20885e-05	6
sqd.2	4.79184e-09	0.755851	0.738	0.558	5.71619e-05	6
CG6770	4.84001e-09	-0.926763	0.43	0.657	5.77365e-05	6
Lac.1	4.98527e-09	1.08988	0.238	0.07	5.94692e-05	6
CG15144	5.30381e-09	1.26505	0.169	0.036	6.32691e-05	6
Rel.1	5.64113e-09	1.33778	0.343	0.137	6.72931e-05	6
CG5853	5.72325e-09	1.359	0.151	0.031	6.82727e-05	6
Xbp1	5.87172e-09	0.653105	0.419	0.203	7.00437e-05	6
rl.1	6.29676e-09	-0.448138	0.919	0.973	7.5114e-05	6
stv.2	6.46538e-09	1.3547	0.43	0.211	7.71256e-05	6
NimB4.2	6.49604e-09	-1.02264	0.186	0.424	7.74912e-05	6
CG9005.2	6.51145e-09	-1.12421	0.203	0.411	7.76751e-05	6
Gclm.1	6.61792e-09	1.2349	0.285	0.102	7.89452e-05	6
Atf3.2	7.08121e-09	1.10644	0.39	0.177	8.44717e-05	6
Arpc2	7.91315e-09	0.888448	0.233	0.072	9.43959e-05	6
spz	9.34491e-09	1.13138	0.157	0.029	0.000111475	6
Nmda1.1	9.90549e-09	1.09969	0.267	0.089	0.000118163	6
CG9003.3	1.13148e-08	-1.11483	0.157	0.355	0.000134975	6
Itgbn	1.15105e-08	1.06394	0.145	0.023	0.000137309	6
mam.1	1.18295e-08	-1.17429	0.203	0.424	0.000141114	6
ifc	1.19568e-08	0.956947	0.128	0.021	0.000142633	6
sgg.3	1.28207e-08	-0.658744	0.733	0.82	0.000152938	6
RasGAP1.1	1.40709e-08	1.05091	0.483	0.275	0.000167852	6
eIF2beta.1	1.43512e-08	1.09051	0.331	0.135	0.000171196	6
sbb	1.49416e-08	-0.668666	0.645	0.81	0.000178238	6
gish.1	1.53912e-08	0.676626	0.703	0.47	0.000183602	6
CG15143	1.60357e-08	1.36153	0.174	0.045	0.00019129	6
cindr.1	1.6668e-08	0.897481	0.535	0.295	0.000198832	6
prage.4	1.91221e-08	0.921118	0.494	0.262	0.000228108	6
Dmtn.1	1.92601e-08	-0.989249	0.151	0.359	0.000229754	6
CG13117	1.9443e-08	0.933874	0.151	0.027	0.000231936	6
scyl.1	1.96833e-08	-0.906232	0.355	0.538	0.000234802	6
Nhe3	2.00195e-08	1.04852	0.267	0.088	0.000238813	6
h.1	2.04309e-08	1.01205	0.57	0.354	0.00024372	6
SNF4Agamma.1	2.25071e-08	0.729876	0.831	0.707	0.000268487	6
PAPLA1.1	2.48454e-08	1.18849	0.378	0.191	0.000296381	6
Tm1.1	2.63074e-08	0.848255	0.564	0.359	0.00031382	6
CG13185	2.85034e-08	0.92184	0.174	0.042	0.000340017	6
Drs.2	3.23789e-08	1.90279	0.192	0.106	0.000386247	6
CG31122.1	3.25479e-08	-1.24222	0.029	0.182	0.000388264	6
Sur-8	3.29338e-08	1.06795	0.169	0.039	0.000392867	6
DOR.3	3.43698e-08	-1.17762	0.116	0.321	0.000409997	6
CG11791.1	3.61681e-08	1.02533	0.39	0.18	0.000431449	6
Tsp42Ed.1	3.72732e-08	1.12231	0.326	0.135	0.000444632	6
14-3-3zeta.1	3.96098e-08	0.774064	0.558	0.339	0.000472505	6
Ntf-2	4.69106e-08	0.805071	0.203	0.06	0.000559596	6
CG6231	4.84219e-08	0.897085	0.122	0.018	0.000577625	6
Ser.3	4.84435e-08	-1.12748	0.18	0.39	0.000577882	6
Rac2	4.94442e-08	0.863544	0.558	0.32	0.000589819	6
Dhap-at	5.08962e-08	0.998685	0.134	0.023	0.000607141	6
CG42668.2	5.16282e-08	0.864457	0.413	0.201	0.000615873	6
SPARC.3	5.51358e-08	-0.796007	0.326	0.548	0.000657715	6
plum.1	6.16615e-08	1.39405	0.267	0.115	0.00073556	6
Hsp23	6.27424e-08	2.37919	0.134	0.044	0.000748454	6
pigs.4	6.51224e-08	0.780671	0.674	0.57	0.000776845	6
Npc2a.1	7.02889e-08	1.08268	0.273	0.096	0.000838476	6
Irc.1	7.10997e-08	0.907133	0.314	0.126	0.000848149	6
Hsc70-4.3	8.84527e-08	0.941749	0.465	0.268	0.00105515	6
CG32425	1.00435e-07	1.00242	0.343	0.152	0.00119809	6
CG42588	1.17584e-07	0.971877	0.203	0.061	0.00140266	6
Pmp70	1.42857e-07	1.08505	0.157	0.037	0.00170414	6
Ziz.3	1.54738e-07	-1.17133	0.157	0.359	0.00184587	6
CG10311	1.57918e-07	1.11228	0.209	0.06	0.00188381	6
Ist1.2	1.66873e-07	0.902986	0.314	0.133	0.00199063	6
CG5059.3	1.68284e-07	-1.05315	0.221	0.366	0.00200746	6
CG17739	1.93194e-07	0.796796	0.105	0.012	0.00230461	6
bves.2	2.02882e-07	0.980993	0.413	0.208	0.00242018	6
Diap1.2	2.05912e-07	0.74647	0.57	0.449	0.00245633	6
Mvl.2	2.26421e-07	0.904109	0.535	0.311	0.00270097	6
tsr.2	2.29967e-07	0.661033	0.262	0.102	0.00274327	6
Tomosyn	2.31302e-07	0.64925	0.587	0.378	0.00275921	6
kay.2	2.58552e-07	1.03936	0.57	0.393	0.00308426	6
PDZ-GEF.2	2.77545e-07	-0.988606	0.105	0.294	0.00331083	6
Vinc.1	2.92871e-07	0.833652	0.244	0.093	0.00349366	6
Fib	3.17723e-07	0.858009	0.105	0.015	0.00379011	6
egh.4	3.25451e-07	0.645328	0.61	0.394	0.0038823	6
Spn88Ea	3.37058e-07	1.00688	0.157	0.04	0.00402076	6
Hers.1	3.52295e-07	-0.762655	0.43	0.621	0.00420252	6
pod1.1	4.43685e-07	0.922917	0.395	0.194	0.00529271	6
Pdp1.3	4.79053e-07	0.586667	0.767	0.575	0.00571463	6
PRAS40.4	5.19072e-07	-1.03701	0.18	0.375	0.00619201	6
Hel89B.1	5.86948e-07	0.85322	0.512	0.299	0.0070017	6
Dyrk2.3	6.07882e-07	-0.78709	0.39	0.589	0.00725142	6
alc.2	6.29844e-07	-1.01264	0.116	0.304	0.00751341	6
Sirup.1	7.25019e-07	-1.09164	0.087	0.259	0.00864875	6
pnt.5	7.27376e-07	-0.449388	0.82	0.909	0.00867686	6
Chd64.3	8.45146e-07	0.78895	0.64	0.481	0.0100817	6
dnc.1	8.6524e-07	-1.00745	0.308	0.501	0.0103214	6
ATP8A.2	9.63517e-07	1.00578	0.308	0.145	0.0114938	6
RhoU	9.7555e-07	1.25668	0.169	0.049	0.0116373	6
CARPB	9.89156e-07	0.701569	0.116	0.023	0.0117996	6
cib.1	1.04165e-06	1.0486	0.262	0.117	0.0124259	6
CG10365.1	1.08694e-06	-1.12321	0.035	0.136	0.0129662	6
CG6357.1	1.09723e-06	1.00153	0.238	0.082	0.0130888	6
CG12576.3	1.135e-06	-1.02444	0.122	0.295	0.0135394	6
Esyt2.1	1.13911e-06	0.971847	0.401	0.206	0.0135884	6
CG5151.3	1.20559e-06	-0.50595	0.651	0.817	0.0143815	6
Corin.1	1.23197e-06	-1.06027	0.105	0.257	0.0146962	6
GlcT	1.24089e-06	0.872638	0.128	0.028	0.0148026	6
Moe.2	1.35157e-06	0.648958	0.657	0.445	0.0161228	6
slmb.1	1.44484e-06	0.825444	0.244	0.103	0.0172355	6
Ac13E.1	1.45277e-06	-0.738837	0.291	0.459	0.0173301	6
Thor.3	1.61492e-06	-1.17357	0.244	0.424	0.0192643	6
Msp300.3	1.76683e-06	0.844126	0.669	0.557	0.0210766	6
caz.1	1.79704e-06	0.790651	0.302	0.137	0.0214368	6
NKAIN	1.79884e-06	0.931814	0.355	0.175	0.0214583	6
NimB1.1	1.91824e-06	-0.997034	0.163	0.325	0.0228826	6
NFAT.1	2.02061e-06	-0.737719	0.395	0.524	0.0241039	6
mask	2.03816e-06	0.810106	0.541	0.402	0.0243132	6
eIF4A.2	2.40664e-06	0.759246	0.419	0.228	0.0287088	6
DIP-epsilon.1	2.43868e-06	-1.07781	0.105	0.276	0.029091	6
Sarm.3	2.47269e-06	0.704239	0.709	0.608	0.0294967	6
ZnT63C.1	2.73716e-06	0.836561	0.372	0.188	0.0326516	6
RapGAP1.2	2.73955e-06	-0.610192	0.57	0.727	0.0326801	6
apt	2.76219e-06	0.987566	0.14	0.039	0.0329502	6
sd.1	2.85384e-06	0.755443	0.413	0.218	0.0340435	6
Tsp42Ee.1	2.85702e-06	0.947587	0.256	0.112	0.0340814	6
CG6051.1	2.91169e-06	0.712888	0.552	0.351	0.0347336	6
Tre1.1	2.97919e-06	0.93472	0.244	0.095	0.0355387	6
Timp	2.99459e-06	1.13742	0.128	0.031	0.0357224	6
eEF1alpha1.3	3.07525e-06	0.57993	0.68	0.499	0.0366846	6
srl	3.10196e-06	0.944552	0.116	0.023	0.0370032	6
mnb.4	3.1091e-06	-0.805067	0.285	0.41	0.0370885	6
Had2.3	3.22045e-06	-1.0179	0.169	0.346	0.0384167	6
Sf3b3	3.25323e-06	0.784888	0.157	0.044	0.0388077	6
Ubi-p63E.1	3.2952e-06	1.00466	0.541	0.389	0.0393085	6
Crtc.3	3.4175e-06	-0.792411	0.372	0.555	0.0407674	6
CG31637.1	3.53463e-06	-0.916163	0.349	0.514	0.0421646	6
CG7029	3.66078e-06	0.82873	0.36	0.221	0.0436695	6
CG32066.1	3.68618e-06	0.669458	0.686	0.555	0.0439725	6
Tpr2.1	3.70999e-06	0.965333	0.413	0.238	0.0442565	6
Hsp26.1	4.02725e-06	2.49334	0.238	0.119	0.0480411	6
Arpc3B	4.12172e-06	0.617568	0.11	0.027	0.049168	6
CG31145.3	4.599e-13	0.911558	1	0.731	5.48614e-09	7
Vha100-2.4	1.31272e-10	0.958372	0.565	0.206	1.56594e-06	7
cwo.3	1.82862e-10	-1.20529	0.594	0.63	2.18136e-06	7
blot.1	2.88816e-10	-1.2036	0.551	0.532	3.44529e-06	7
DOR.4	3.11789e-10	0.373874	0.58	0.28	3.71933e-06	7
CrebA.5	5.12843e-10	0.276924	0.536	0.242	6.1177e-06	7
CaMKI.1	5.74793e-10	-0.257046	0.493	0.297	6.8567e-06	7
RpL10Ab.3	1.29748e-09	-1.45409	0.145	0.266	1.54776e-05	7
Cals.2	1.85333e-09	0.471294	0.522	0.234	2.21084e-05	7
Pp1alpha-96A	2.92e-09	-0.522246	0.203	0.143	3.48327e-05	7
eEF2.4	4.57481e-09	-0.798242	0.362	0.312	5.45729e-05	7
mtd.3	5.57396e-09	0.756478	0.942	0.749	6.64918e-05	7
DIP-epsilon.2	6.78999e-09	0.60044	0.536	0.239	8.09978e-05	7
app.3	6.87613e-09	0.613235	0.725	0.371	8.20253e-05	7
Caper	9.67953e-09	-0.378671	0.362	0.275	0.000115467	7
Best1.1	1.38066e-08	0.639012	0.551	0.25	0.000164699	7
sug	1.44021e-08	0.70642	0.188	0.031	0.000171802	7
CG3777.3	1.71934e-08	1.00933	0.536	0.208	0.0002051	7
l(1)G0196.3	2.73548e-08	0.612973	0.725	0.387	0.000326316	7
pum.3	2.94841e-08	0.470488	1	0.994	0.000351716	7
eIF4A.3	3.00417e-08	-0.94509	0.246	0.253	0.000358367	7
Pxn.4	3.11223e-08	0.715548	0.87	0.525	0.000371257	7
CG43236.2	3.43652e-08	1.08211	0.406	0.124	0.000409942	7
Had2.4	4.27226e-08	0.911003	0.652	0.307	0.000509638	7
CG5151.4	4.58261e-08	0.748702	0.957	0.788	0.00054666	7
CG3961.3	4.95942e-08	0.72233	0.71	0.355	0.00059161	7
Pdk.4	5.57538e-08	-1.74311	0.203	0.44	0.000665088	7
Ten-m.4	5.72033e-08	0.529774	1	0.995	0.000682378	7
Prps.3	6.20002e-08	-1.82797	0.159	0.361	0.0007396	7
RpL4.2	6.83569e-08	-1.15782	0.145	0.202	0.00081543	7
CG14153.1	7.00088e-08	0.876663	0.304	0.083	0.000835135	7
hppy.2	7.56192e-08	0.437835	0.884	0.568	0.000902061	7
Adar.1	7.83257e-08	0.502207	0.464	0.213	0.000934348	7
l(3)80Fg.2	9.48477e-08	0.768665	0.899	0.594	0.00113144	7
Rbp1-like.2	9.59825e-08	0.793699	0.522	0.225	0.00114498	7
wrd.1	1.03108e-07	0.325438	0.391	0.182	0.00122998	7
PGRP-LC.3	1.09508e-07	0.662945	0.638	0.324	0.00130632	7
Ten-a.1	1.12379e-07	-1.30707	0.159	0.219	0.00134056	7
RpL21.4	1.12629e-07	-1.16535	0.217	0.278	0.00134355	7
Idgf2	1.17254e-07	0.258677	0.348	0.168	0.00139872	7
jim.4	1.19112e-07	-0.282603	0.594	0.448	0.00142089	7
CG42694.1	1.20772e-07	0.596758	0.261	0.093	0.00144069	7
Lpin.4	1.36953e-07	-2.01366	0.101	0.32	0.00163372	7
Nc73EF.3	1.48945e-07	-0.632095	0.203	0.177	0.00177677	7
Cat	1.516e-07	-0.53417	0.174	0.128	0.00180844	7
ninaE.1	1.52561e-07	-1.26998	0.217	0.242	0.0018199	7
CG3164.2	1.5871e-07	0.726581	0.507	0.222	0.00189326	7
Culd	1.89167e-07	-0.420609	0.145	0.1	0.00225657	7
CG4259	2.07955e-07	1.16816	0.391	0.118	0.00248069	7
Pcf11.1	2.21233e-07	-0.282414	0.391	0.28	0.00263908	7
larp.1	2.22717e-07	-0.744855	0.275	0.276	0.00265679	7
Sema2a.4	2.28569e-07	0.816869	0.768	0.43	0.0027266	7
RpL3.4	2.45717e-07	-1.54619	0.101	0.27	0.00293116	7
Indy.1	2.53047e-07	0.556255	0.435	0.189	0.00301859	7
Pde9.2	2.61984e-07	0.322826	0.87	0.58	0.00312521	7
CG15695.4	2.64441e-07	0.46979	0.246	0.083	0.00315451	7
ush.4	2.68298e-07	0.67854	0.942	0.711	0.00320053	7
Ank	2.74649e-07	-0.459549	0.406	0.354	0.00327629	7
bves.3	3.18389e-07	0.471704	0.449	0.222	0.00379806	7
Btk29A.5	4.04637e-07	0.693016	0.957	0.764	0.00482692	7
Mad	4.4144e-07	0.399012	0.435	0.215	0.00526594	7
ClC-a.1	4.47776e-07	0.805839	0.391	0.144	0.00534152	7
CG31122.2	4.49686e-07	0.831901	0.391	0.151	0.00536431	7
Sema5c.3	4.9917e-07	1.03093	0.754	0.498	0.00595459	7
egh.5	5.25879e-07	0.690901	0.739	0.405	0.00627322	7
fl(2)d	5.64302e-07	0.30177	0.377	0.18	0.00673156	7
rhea.4	5.95583e-07	-0.513394	0.435	0.367	0.00710471	7
eEF1alpha1.4	6.14833e-07	-0.926148	0.507	0.523	0.00733435	7
Rga.1	6.33228e-07	0.535222	0.333	0.143	0.00755377	7
RhoGEF2	6.57153e-07	0.512637	0.681	0.381	0.00783917	7
CG31211.2	6.71709e-07	0.402084	0.319	0.147	0.00801282	7
Thd1.2	6.73353e-07	0.376344	0.609	0.358	0.00803242	7
eEF1beta.1	8.42272e-07	-0.720618	0.116	0.127	0.0100475	7
CG17124.2	1.00542e-06	0.636757	0.739	0.411	0.0119936	7
pAbp.4	1.06782e-06	-0.83288	0.42	0.492	0.012738	7
blw.1	1.14375e-06	-0.672633	0.13	0.135	0.0136438	7
CG9328.2	1.24248e-06	0.817301	0.783	0.464	0.0148216	7
CG41099	1.2969e-06	0.511486	0.348	0.152	0.0154707	7
NimB2.2	1.31305e-06	-0.586357	0.261	0.24	0.0156633	7
upSET	1.47746e-06	0.465643	0.725	0.44	0.0176246	7
Srrm234	1.50145e-06	0.307476	0.377	0.195	0.0179108	7
uex.4	1.60215e-06	0.820613	0.826	0.539	0.019112	7
Cyp6w1	1.61877e-06	0.305984	0.188	0.064	0.0193103	7
drongo.1	1.61932e-06	0.506437	0.783	0.48	0.0193168	7
RpS30.3	1.71328e-06	-0.813225	0.232	0.235	0.0204377	7
UQCR-Q.1	1.81109e-06	-0.355886	0.145	0.088	0.0216045	7
GstE12.1	1.92761e-06	0.272313	0.232	0.08	0.0229944	7
Atf6.1	2.00827e-06	0.713608	0.594	0.294	0.0239567	7
Saf-B.2	2.08342e-06	0.301613	0.29	0.139	0.0248531	7
l(3)L1231.3	2.10185e-06	0.343391	0.957	0.715	0.025073	7
Bacc.2	2.76247e-06	-0.468187	0.464	0.388	0.0329535	7
RpL23.2	2.77451e-06	-0.980106	0.275	0.334	0.0330971	7
InR.5	2.86464e-06	-0.993042	0.812	0.856	0.0341723	7
sta.3	3.05336e-06	-0.760326	0.246	0.277	0.0364235	7
CG9171.4	3.30581e-06	0.799132	0.652	0.339	0.0394351	7
Evi5.1	3.34453e-06	0.460184	0.42	0.208	0.0398969	7
Syp.3	3.3495e-06	0.57023	0.971	0.844	0.0399562	7
SCaMC.3	3.53657e-06	-1.65168	0.087	0.297	0.0421878	7
crq.1	3.6297e-06	0.709928	0.725	0.42	0.0432987	7
CG3726.2	3.65998e-06	0.385608	0.899	0.627	0.0436599	7
RpL7.2	3.71652e-06	-0.964301	0.188	0.247	0.0443343	7
Hml.5	3.73806e-06	0.730233	0.899	0.638	0.0445913	7
RpS15.3	3.75126e-06	-1.45328	0.072	0.328	0.0447488	7
CG11360.2	3.75648e-06	0.764328	0.319	0.111	0.0448111	7
CG31635.1	3.9999e-06	0.596939	0.609	0.324	0.0477148	7
sesB.2	4.09801e-06	-1.17694	0.13	0.212	0.0488851	7
RpS27.3	4.1835e-06	-1.55988	0.13	0.322	0.049905	7
rl.2	4.18836e-06	0.443674	1	0.964	0.0499629	7
CG13743	2.30466e-36	5.05377	0.518	0.019	2.74922e-32	8
PPO2	3.97738e-35	5.40881	0.536	0.024	4.74461e-31	8
robo2	6.91421e-35	3.9219	0.643	0.033	8.24796e-31	8
lz	2.64785e-32	3.84345	0.482	0.006	3.15862e-28	8
Pde1c	6.51011e-32	6.36811	0.464	0.062	7.76591e-28	8
klu	1.52326e-30	4.12495	0.536	0.024	1.81709e-26	8
N.3	1.5795e-29	2.83027	0.786	0.288	1.88418e-25	8
peb	9.29625e-28	3.80578	0.482	0.018	1.10895e-23	8
Ten-m.5	1.40616e-27	-1.35354	0.929	0.998	1.6774e-23	8
PPO1	6.48693e-27	4.11993	0.446	0.015	7.73826e-23	8
E(spl)mbeta-HLH	2.93945e-26	2.82569	0.518	0.024	3.50647e-22	8
Tet.2	1.78153e-24	3.05185	0.482	0.196	2.12518e-20	8
ct.3	2.76444e-23	1.80808	0.786	0.764	3.29771e-19	8
mtgo.1	2.18234e-20	-1.53217	0.804	0.97	2.60331e-16	8
tna.5	2.9647e-20	2.66744	0.536	0.208	3.53659e-16	8
CG43187	3.4887e-15	2.052	0.214	0.001	4.16167e-11	8
caps.5	3.6107e-15	2.64364	0.357	0.093	4.3072e-11	8
E(spl)malpha-BFM	1.19527e-14	2.37534	0.321	0.02	1.42583e-10	8
Jupiter.2	1.54859e-13	-1.74186	0.536	0.854	1.84731e-09	8
CG31431	2.50925e-13	2.41214	0.375	0.047	2.99328e-09	8
Ppn.3	2.07782e-12	-1.16908	0.768	0.974	2.47864e-08	8
cpo.4	7.66803e-12	1.32649	0.893	0.693	9.14719e-08	8
Mctp	1.14058e-11	2.28729	0.232	0.012	1.3606e-07	8
Men.3	1.9341e-11	2.32065	0.554	0.216	2.30719e-07	8
CG9932.1	4.57944e-11	-1.199	0.768	0.94	5.46281e-07	8
zfh2	1.18096e-10	2.52452	0.25	0.036	1.40877e-06	8
CG13252	1.30432e-10	1.49809	0.214	0.01	1.55592e-06	8
Cirl.1	1.77135e-10	1.49294	0.607	0.405	2.11305e-06	8
Ndae1	3.0808e-10	2.21968	0.375	0.1	3.67509e-06	8
ATP8B.1	6.12898e-10	1.90799	0.357	0.06	7.31126e-06	8
CG5828	4.43679e-09	1.55189	0.179	0.008	5.29264e-05	8
Prosap.3	5.31796e-09	-1.21507	0.821	0.952	6.34379e-05	8
kst.2	6.2592e-09	2.01111	0.518	0.18	7.4666e-05	8
Trim9	1.07442e-08	1.84181	0.179	0.011	0.000128167	8
drpr.3	3.64837e-08	-1.26429	0.482	0.765	0.000435214	8
Pde9.3	1.10246e-07	1.1536	0.821	0.585	0.00131513	8
bru2.1	1.44498e-07	1.32549	0.304	0.063	0.00172372	8
fkh	1.51018e-07	1.20026	0.143	0.008	0.00180149	8
Rtnl1.4	1.7602e-07	1.25232	0.411	0.108	0.00209974	8
CG32264.6	1.947e-07	1.33681	0.696	0.435	0.00232257	8
sm.3	2.33046e-07	1.41793	0.536	0.229	0.00278	8
CAP	2.49996e-07	1.63227	0.304	0.064	0.0029822	8
Ctr1A.1	2.51054e-07	1.8189	0.286	0.1	0.00299482	8
Elk	3.28417e-07	1.34268	0.143	0.005	0.00391768	8
Col4a1.3	3.35037e-07	-0.815943	0.714	0.933	0.00399666	8
fok.4	3.53595e-07	1.78449	0.411	0.176	0.00421803	8
AstA-R1	3.96897e-07	5.40642	0.143	0.012	0.00473459	8
Sema1b.2	3.98566e-07	-1.58154	0.304	0.556	0.0047545	8
kek5.2	4.34865e-07	1.24595	0.589	0.38	0.0051875	8
Fili	4.37507e-07	1.44979	0.161	0.011	0.00521902	8
CG9518	4.38636e-07	2.39108	0.125	0.023	0.00523249	8
SKIP	4.62816e-07	2.50883	0.214	0.03	0.00552093	8
Pvr.4	4.75693e-07	-1.05535	0.732	0.884	0.00567454	8
aqz.2	4.85406e-07	1.06422	0.964	0.894	0.0057904	8
CG9743	5.15593e-07	1.6946	0.214	0.026	0.00615051	8
sty.4	6.52228e-07	-1.09834	0.643	0.859	0.00778042	8
CG8468	7.65279e-07	1.60639	0.196	0.029	0.00912901	8
CAH2	7.82934e-07	1.06454	0.143	0.008	0.00933962	8
LpR2.4	8.22077e-07	-0.982034	0.768	0.908	0.00980656	8
Mvl.4	9.90256e-07	-1.88262	0.054	0.352	0.0118128	8
CG43693	1.0139e-06	1.27362	0.196	0.023	0.0120949	8
cv-c.6	1.19973e-06	0.844524	0.982	0.919	0.0143115	8
Egfr.1	1.27151e-06	1.73048	0.286	0.063	0.0151679	8
Dl	2.41985e-06	1.68166	0.125	0.006	0.0288664	8
Had2.5	2.6873e-06	-1.85942	0.054	0.336	0.0320569	8
nudC	3.0933e-06	1.14377	0.196	0.028	0.0369	8
Ncc69	3.26738e-06	1.65321	0.161	0.013	0.0389766	8
CG31145.4	3.48622e-06	-1.11832	0.5	0.755	0.0415872	8
Mmp2.5	3.50049e-06	-2.06963	0.179	0.473	0.0417574	8
