# Supplementary material for: DNA damage signaling in Drosophila macrophages modulates systemic cytokine levels in response to oxidative stress
Source: eLife. 2024 Jan 8;12:RP86700. doi: 10.7554/eLife.86700 (PMC10945508; doi:10.7554/eLife.86700)
Supplement: Supplementary file 2. [file elife-86700-supp2.xlsx]

## Sheet: Tabelle1
Gene name	p-value	Average Log2 Fold Change	pct.1	pct.2	adjusted p-value	Cluster Identity
Gbs-70E	0	2.89637	0.956	0.32	0	1
FASN1	0	2.41289	0.993	0.692	0	1
Nplp2	1.83147e-251	1.83485	0.968	0.52	2.18476e-247	1
CG9674	1.10187e-249	-2.83188	0.241	0.826	1.31442e-245	1
GstD1	4.12528e-248	-3.16	0.274	0.84	4.92105e-244	1
CG14823	5.38393e-230	2.27518	0.713	0.165	6.42249e-226	1
CG11089	4.95059e-229	-2.75522	0.294	0.84	5.90555e-225	1
ref(2)P	3.03748e-225	-2.8026	0.274	0.815	3.6234e-221	1
stv	1.4338e-221	-3.40992	0.244	0.803	1.71039e-217	1
Culd	2.42891e-197	2.0441	0.679	0.179	2.89745e-193	1
Tsp42Ed	1.71116e-194	-2.79086	0.053	0.625	2.04124e-190	1
CG34166	7.27869e-193	2.38301	0.954	0.728	8.68276e-189	1
Nmdmc	2.4401e-189	-2.06766	0.292	0.817	2.91079e-185	1
AnxB9	3.28083e-188	-3.19363	0.127	0.678	3.9137e-184	1
ACC	7.1482e-187	1.53476	0.947	0.585	8.52709e-183	1
Invadolysin	1.09892e-185	2.62171	0.583	0.121	1.31091e-181	1
InR	2.22561e-184	-1.66716	0.818	0.959	2.65493e-180	1
CG6503	7.73529e-180	1.53669	0.965	0.719	9.22743e-176	1
raw	3.47057e-179	-2.23163	0.325	0.786	4.14004e-175	1
Pfas	1.16832e-178	-2.39308	0.223	0.734	1.39369e-174	1
CG7720	7.48472e-177	2.38619	0.674	0.199	8.92852e-173	1
CG42788	4.8118e-174	2.47185	0.771	0.34	5.74e-170	1
bun	6.91776e-174	1.81201	0.964	0.784	8.25219e-170	1
Acsl	7.44316e-173	1.79183	0.827	0.423	8.87895e-169	1
Gpdh1	1.27079e-172	2.1388	0.668	0.213	1.51592e-168	1
CG7470	3.84306e-172	1.25854	0.956	0.616	4.58439e-168	1
sug	6.51517e-172	2.33556	0.639	0.17	7.77194e-168	1
CCHa2	6.20714e-171	2.05248	0.564	0.114	7.40449e-167	1
GstE1	1.63888e-165	-2.98721	0.034	0.545	1.95502e-161	1
CG14207	5.40251e-165	-2.33107	0.265	0.745	6.44465e-161	1
Ubx	3.02072e-164	1.19032	0.986	0.793	3.60342e-160	1
CG5953	2.01739e-163	-2.38123	0.418	0.808	2.40654e-159	1
AcCoAS	5.37439e-163	1.62935	0.889	0.583	6.41111e-159	1
eIF2beta	1.98779e-162	-2.46607	0.207	0.686	2.37123e-158	1
CG1213	4.17749e-162	2.03373	0.645	0.191	4.98333e-158	1
CaMKI	5.04066e-161	0.904943	0.994	0.946	6.013e-157	1
CG10082	1.09636e-158	1.67128	0.846	0.485	1.30785e-154	1
CG8745	2.57635e-158	2.43403	0.66	0.223	3.07333e-154	1
Act5C	3.54095e-155	-2.18384	0.225	0.704	4.224e-151	1
Xrp1	7.46838e-155	-1.39317	0.828	0.952	8.90903e-151	1
Ubi-p63E	7.46879e-155	-2.22721	0.327	0.753	8.90952e-151	1
Men	5.18839e-154	1.88198	0.868	0.576	6.18923e-150	1
vir-1	1.39921e-153	-2.02532	0.517	0.847	1.66912e-149	1
CG12795	2.31482e-153	-3.06555	0.026	0.509	2.76135e-149	1
CG45050	3.75144e-153	-1.53276	0.814	0.946	4.4751e-149	1
Abl	4.21673e-153	-2.80599	0.047	0.532	5.03013e-149	1
bru1	1.91868e-152	1.15199	0.954	0.724	2.28879e-148	1
CG13315	9.92202e-151	1.55608	0.956	0.756	1.1836e-146	1
cv-c	1.59611e-150	-1.84574	0.356	0.795	1.904e-146	1
Syp	7.15848e-150	1.16289	0.958	0.744	8.53935e-146	1
CG10383	2.96621e-148	-2.58265	0.146	0.631	3.53839e-144	1
Egfr	1.38256e-147	1.25863	0.944	0.69	1.64926e-143	1
CG8034	9.06184e-147	1.85038	0.826	0.496	1.08099e-142	1
Idh	2.30967e-146	1.80012	0.697	0.283	2.7552e-142	1
PhKgamma	1.56906e-144	1.46159	0.834	0.492	1.87173e-140	1
Nc73EF	6.55875e-143	1.41517	0.864	0.549	7.82393e-139	1
CenG1A	1.08856e-142	-2.80401	0.25	0.694	1.29854e-138	1
puc	4.36241e-142	-1.87895	0.442	0.817	5.20392e-138	1
oys	2.90692e-141	-2.6512	0.026	0.482	3.46766e-137	1
Helz	3.96363e-140	-1.57469	0.842	0.942	4.72822e-136	1
MtnA	1.91823e-139	-2.14521	0.259	0.719	2.28826e-135	1
AkhR	6.2837e-138	1.66839	0.6	0.181	7.49582e-134	1
apolpp	1.57095e-137	0.921326	0.964	0.725	1.87399e-133	1
CG1648	2.3117e-137	1.62641	0.844	0.496	2.75762e-133	1
CG15096	9.13297e-137	1.66954	0.52	0.121	1.08947e-132	1
CG1673	1.42299e-136	-1.85398	0.303	0.725	1.69748e-132	1
CG17841	8.21544e-136	1.53425	0.737	0.348	9.8002e-132	1
CG7766	2.58908e-135	1.38315	0.81	0.456	3.08852e-131	1
AdipoR	2.52813e-134	1.41819	0.792	0.413	3.01581e-130	1
mamo	3.74652e-134	1.43538	0.813	0.429	4.46922e-130	1
Eglp4	5.4584e-134	1.74746	0.648	0.233	6.51132e-130	1
CG16898	6.32619e-133	-2.39283	0.133	0.586	7.54652e-129	1
Frl	7.05993e-133	-2.16603	0.223	0.657	8.42179e-129	1
LRR	1.03176e-132	-2.08297	0.224	0.67	1.23079e-128	1
if	5.43552e-132	1.90566	0.62	0.214	6.48403e-128	1
cact	4.69787e-131	-1.80851	0.382	0.768	5.60409e-127	1
IP3K1	4.78717e-131	-2.05356	0.276	0.698	5.71062e-127	1
rhea	7.44943e-130	-2.58437	0.215	0.631	8.88643e-126	1
Trxr-1	2.34288e-128	-2.1724	0.095	0.536	2.79482e-124	1
GEFmeso	1.75419e-127	-2.14293	0.145	0.583	2.09257e-123	1
Hers	2.41168e-127	-1.71727	0.366	0.749	2.8769e-123	1
Chd64	3.29996e-127	-2.17879	0.166	0.598	3.93652e-123	1
kay	7.00175e-127	-2.22074	0.241	0.653	8.35239e-123	1
Tret1-1	3.83305e-125	1.5724	0.791	0.449	4.57244e-121	1
AdSS	1.13193e-124	-2.11668	0.121	0.561	1.35028e-120	1
Jabba	2.05764e-124	1.74027	0.542	0.157	2.45456e-120	1
UGP	2.76322e-124	1.68982	0.681	0.295	3.29624e-120	1
Snoo	5.73592e-124	1.08472	0.955	0.784	6.84238e-120	1
CG3036	4.42702e-123	-1.63265	0.367	0.791	5.28099e-119	1
Fer1HCH	6.26495e-122	-1.38197	0.624	0.89	7.47346e-118	1
CG17124	1.57023e-119	1.27031	0.896	0.676	1.87313e-115	1
Mob2	1.58781e-119	-1.64737	0.579	0.838	1.8941e-115	1
mtd	1.64664e-119	1.3581	0.878	0.6	1.96428e-115	1
MTA1-like	3.30311e-119	-2.86524	0.165	0.565	3.94028e-115	1
GIIIspla2	4.30652e-119	-2.18911	0.129	0.558	5.13725e-115	1
TER94	4.26195e-118	-1.86159	0.218	0.627	5.08408e-114	1
Chchd2	5.27286e-118	-1.70436	0.365	0.742	6.28999e-114	1
Hsp26	1.7004e-117	-3.0583	0.138	0.56	2.02841e-113	1
CG8485	2.05293e-117	1.78983	0.484	0.131	2.44894e-113	1
lola	8.83561e-116	0.917389	0.964	0.814	1.054e-111	1
mbf1	5.43977e-115	-2.16843	0.074	0.486	6.4891e-111	1
CG17108	6.77094e-115	1.06053	0.68	0.264	8.07706e-111	1
spoon	1.06691e-114	1.45523	0.671	0.312	1.27272e-110	1
CG42588	1.41958e-114	-2.24362	0.048	0.451	1.69342e-110	1
Stat92E	2.51977e-114	1.48093	0.801	0.486	3.00583e-110	1
Hsc70-4	5.15729e-114	-1.44462	0.552	0.832	6.15213e-110	1
loco	8.61588e-114	-2.46567	0.015	0.402	1.02779e-109	1
phu	2.20062e-113	1.74065	0.328	0.036	2.62512e-109	1
Akap200	3.60889e-113	1.55319	0.757	0.455	4.30504e-109	1
trbl	5.2681e-112	-1.7629	0.245	0.644	6.28432e-108	1
CG7130	4.27662e-111	-2.48249	0.015	0.396	5.10157e-107	1
Pde6	1.9041e-110	1.32606	0.749	0.395	2.2714e-106	1
CG6770	3.0239e-110	0.941315	0.987	0.886	3.60721e-106	1
CG1578	3.82667e-110	1.5191	0.631	0.259	4.56483e-106	1
BomT3	4.25636e-110	1.12607	0.695	0.295	5.07741e-106	1
Pka-C1	9.02439e-110	-1.54478	0.441	0.778	1.07652e-105	1
CG4716	1.64034e-109	0.990137	0.952	0.811	1.95677e-105	1
Hsp83	2.02455e-109	-1.76052	0.532	0.834	2.41508e-105	1
Bacc	2.69949e-108	1.06622	0.902	0.683	3.22022e-104	1
CG8312	2.52517e-107	-2.66074	0.067	0.454	3.01227e-103	1
drpr	4.16159e-107	-1.9144	0.195	0.585	4.96436e-103	1
CG13607	7.60577e-107	1.46145	0.382	0.07	9.07292e-103	1
cher	5.83458e-106	-2.45932	0.04	0.415	6.96007e-102	1
Src64B	2.16941e-105	-2.06803	0.298	0.651	2.58789e-101	1
CG32521	2.19845e-105	1.07966	0.925	0.694	2.62253e-101	1
Cyt-b5-r	3.13612e-103	1.2292	0.793	0.452	3.74108e-99	1
alpha-Est9	9.79545e-102	1.70117	0.39	0.08	1.1685e-97	1
LpR2	2.62874e-101	1.0514	0.957	0.793	3.13582e-97	1
CG32647	4.39359e-101	1.33287	0.783	0.456	5.24111e-97	1
Socs36E	6.61121e-101	-2.41178	0.072	0.446	7.88651e-97	1
CG8086	7.17427e-99	-2.12379	0.075	0.447	8.55818e-95	1
Hsp27	3.89118e-98	-3.50092	0.096	0.462	4.64179e-94	1
CG42524	1.44444e-97	1.2046	0.704	0.356	1.72307e-93	1
AOX1	2.3976e-97	-2.10053	0.088	0.455	2.86009e-93	1
Tpr2	1.20864e-96	-1.4918	0.36	0.714	1.44179e-92	1
Rpn6	2.03774e-96	-1.66863	0.134	0.515	2.43082e-92	1
Fer2LCH	7.53948e-96	-1.28318	0.569	0.831	8.99384e-92	1
Sox102F	9.56649e-96	0.939175	0.901	0.672	1.14119e-91	1
Vps13	1.88262e-95	-1.80062	0.113	0.485	2.24578e-91	1
Smg5	3.49648e-95	-1.77739	0.246	0.603	4.17095e-91	1
Hsc70Cb	3.95432e-95	-1.85531	0.295	0.643	4.7171e-91	1
Nmda1	4.99511e-95	-1.73806	0.104	0.473	5.95866e-91	1
ps	1.64782e-93	0.701053	0.996	0.978	1.96569e-89	1
Drak	3.11388e-92	1.55686	0.79	0.539	3.71455e-88	1
Gart	1.09648e-90	-1.32589	0.464	0.765	1.30799e-86	1
Srr	1.47455e-90	1.58577	0.408	0.107	1.75899e-86	1
Pvr	7.52091e-90	-2.45422	0.204	0.551	8.97169e-86	1
gce	1.17867e-89	1.32634	0.687	0.383	1.40604e-85	1
Gug	2.96768e-89	1.04866	0.816	0.557	3.54014e-85	1
CG5151	7.17406e-89	1.49821	0.806	0.577	8.55794e-85	1
Pde9	7.47326e-89	1.04545	0.892	0.673	8.91485e-85	1
kdn	4.51749e-88	1.47174	0.518	0.19	5.38891e-84	1
retm	4.69282e-88	1.46394	0.496	0.183	5.59806e-84	1
CG44325	6.71387e-88	-1.74994	0.086	0.432	8.00898e-84	1
Hsp68	1.00251e-87	-2.74476	0.071	0.411	1.1959e-83	1
fbp	1.45335e-87	1.33279	0.531	0.211	1.7337e-83	1
MFS14	9.29954e-87	1.42143	0.617	0.295	1.10934e-82	1
bmm	5.83125e-86	-0.966698	0.564	0.86	6.9561e-82	1
chic	6.53065e-86	-1.77198	0.19	0.53	7.79041e-82	1
sra	7.40686e-86	-1.84629	0.049	0.379	8.83565e-82	1
elB	4.49308e-85	-1.96616	0.085	0.423	5.35979e-81	1
Rpn2	1.34874e-84	-1.63767	0.08	0.419	1.60891e-80	1
PKD	2.16038e-84	1.43027	0.501	0.188	2.57712e-80	1
Piezo	6.68001e-84	-1.79789	0.17	0.52	7.96858e-80	1
CG14990	4.50078e-83	1.39978	0.351	0.082	5.36898e-79	1
Tsf1	7.12938e-83	1.22307	0.512	0.187	8.50463e-79	1
PCB	7.48192e-83	1.01572	0.814	0.512	8.92518e-79	1
Ndae1	3.95235e-82	1.72227	0.539	0.24	4.71476e-78	1
Pmp70	1.04056e-81	1.43308	0.474	0.171	1.24128e-77	1
pyr	1.35974e-81	-1.93906	0.077	0.405	1.62204e-77	1
Rel	3.51952e-81	-1.30368	0.307	0.65	4.19843e-77	1
CG7920	3.67492e-81	1.26989	0.506	0.193	4.38382e-77	1
Gpo1	4.25547e-81	1.38028	0.487	0.177	5.07635e-77	1
CG16926	1.36531e-80	1.05254	0.8	0.536	1.62867e-76	1
pcs	2.6543e-80	-1.96472	0.204	0.532	3.16631e-76	1
klu	3.03458e-79	-1.41616	0.258	0.603	3.61995e-75	1
Prosalpha3	3.59215e-79	-1.76023	0.06	0.371	4.28507e-75	1
eff	5.47882e-79	-1.35026	0.391	0.688	6.53569e-75	1
dnc	1.69977e-78	0.909603	0.893	0.683	2.02766e-74	1
AspRS	3.29584e-78	-1.80822	0.029	0.325	3.93161e-74	1
whd	1.28693e-77	1.1818	0.72	0.417	1.53518e-73	1
Droj2	2.63475e-77	-1.41032	0.192	0.525	3.14299e-73	1
CCT3	3.84321e-77	-1.90606	0.041	0.34	4.58456e-73	1
Atg1	1.35724e-76	-1.6707	0.293	0.608	1.61905e-72	1
cic	3.8154e-76	0.932152	0.819	0.589	4.55139e-72	1
IM4	6.29947e-76	0.813342	0.525	0.2	7.51464e-72	1
Rpn5	7.625e-76	-1.61343	0.061	0.366	9.09586e-72	1
Cyp4p1	5.00304e-75	-1.60979	0.097	0.415	5.96812e-71	1
zfh1	9.97674e-75	-1.58839	0.164	0.494	1.19012e-70	1
CG5955	1.32115e-74	-1.72256	0.015	0.295	1.576e-70	1
Gdap2	2.02941e-74	-1.51619	0.189	0.514	2.42088e-70	1
CG13360	3.2978e-74	1.36574	0.317	0.071	3.93394e-70	1
Trx-2	8.76194e-74	-1.83495	0.085	0.39	1.04521e-69	1
Lsd-1	6.51206e-73	1.46589	0.507	0.211	7.76824e-69	1
scyl	6.87302e-73	-1.12743	0.672	0.875	8.19882e-69	1
ImpL2	8.43016e-73	-1.80114	0.051	0.344	1.00563e-68	1
CG42668	1.45571e-72	-1.24643	0.401	0.696	1.73652e-68	1
CG4629	1.50064e-72	1.49177	0.437	0.162	1.79011e-68	1
Rpn10	2.67806e-72	-1.53702	0.052	0.346	3.19466e-68	1
Pdha	6.34352e-72	1.21738	0.422	0.146	7.56718e-68	1
Prosbeta7	1.31393e-71	-1.54971	0.056	0.345	1.56739e-67	1
Apoltp	2.44015e-71	-1.06508	0.658	0.86	2.91085e-67	1
CG17646	2.74496e-71	0.953745	0.93	0.813	3.27446e-67	1
Idgf1	3.54464e-71	-1.56272	0.083	0.384	4.2284e-67	1
CG8389	3.42141e-70	1.62642	0.307	0.075	4.0814e-66	1
pAbp	6.99775e-70	-0.980461	0.685	0.86	8.34762e-66	1
Rad23	9.90963e-70	-1.3985	0.123	0.435	1.18212e-65	1
Dmtn	1.61628e-69	0.944921	0.865	0.692	1.92806e-65	1
cwo	1.76715e-69	0.832666	0.938	0.85	2.10803e-65	1
CG32369	4.48636e-69	-1.26536	0.5	0.758	5.35178e-65	1
Hipk	5.63844e-69	-1.06246	0.528	0.765	6.72609e-65	1
CG18135	1.71903e-68	0.854641	0.868	0.649	2.05063e-64	1
Prosalpha6	2.26071e-68	-1.55832	0.042	0.316	2.6968e-64	1
CG11791	5.625e-68	-1.50985	0.227	0.534	6.71007e-64	1
Prosbeta4	1.06009e-67	-1.51563	0.054	0.335	1.26458e-63	1
Xbp1	3.56489e-67	-1.12708	0.378	0.67	4.25256e-63	1
CG16799	4.12341e-67	1.34049	0.356	0.108	4.91881e-63	1
c11.1	9.74296e-67	-1.48632	0.059	0.339	1.16224e-62	1
Hsp70Bc	1.35738e-66	-1.94629	0.011	0.262	1.61922e-62	1
NFAT	2.92961e-66	0.905176	0.83	0.646	3.49473e-62	1
AttB	5.41365e-66	-2.36433	0.021	0.277	6.45794e-62	1
ppl	8.40278e-66	1.2774	0.401	0.143	1.00237e-61	1
DOR	9.90179e-66	1.17395	0.76	0.534	1.18118e-61	1
dsx	1.30248e-65	0.823473	0.732	0.434	1.55373e-61	1
cue	2.75713e-65	1.25842	0.321	0.085	3.28898e-61	1
atk	4.46543e-65	-1.60377	0.009	0.254	5.32681e-61	1
Myo31DF	4.8694e-65	-2.06437	0.05	0.318	5.80871e-61	1
frma	6.70937e-65	1.18074	0.462	0.195	8.00361e-61	1
HDAC6	1.39454e-64	1.07874	0.526	0.25	1.66355e-60	1
Ufd4	1.6868e-64	-1.38263	0.149	0.442	2.01218e-60	1
cbt	5.02889e-64	1.20221	0.459	0.188	5.99896e-60	1
l(1)G0196	2.16101e-63	1.02512	0.618	0.342	2.57787e-59	1
Spn88Eb	3.64531e-63	-1.45194	0.03	0.286	4.34849e-59	1
Rpn13	5.29754e-63	-1.3359	0.087	0.367	6.31943e-59	1
Rpt5	9.04562e-63	-1.4305	0.039	0.297	1.07905e-58	1
CG41378	1.39191e-62	0.963656	0.716	0.46	1.66041e-58	1
teq	5.52969e-62	1.0616	0.427	0.163	6.59637e-58	1
CG6040	5.96671e-62	1.34127	0.308	0.082	7.11769e-58	1
LamC	6.4537e-62	-1.56028	0.082	0.356	7.69862e-58	1
Sem1	1.19089e-61	-1.46933	0.045	0.3	1.42061e-57	1
MRP	1.19367e-61	-2.0162	0.241	0.519	1.42393e-57	1
px	1.70089e-61	0.826955	0.854	0.672	2.02899e-57	1
CG10527	2.71441e-61	-1.54849	0.047	0.303	3.23802e-57	1
CG9399	4.10181e-61	1.17597	0.285	0.072	4.89305e-57	1
CG31635	4.58093e-61	1.01709	0.717	0.47	5.46459e-57	1
nkd	5.18394e-61	-1.46585	0.252	0.544	6.18392e-57	1
CG1358	5.99186e-61	1.38456	0.368	0.125	7.14769e-57	1
AdSL	6.11187e-61	-1.42731	0.048	0.308	7.29085e-57	1
pst	7.05062e-61	-1.11443	0.402	0.673	8.41069e-57	1
Ork1	8.8218e-61	1.18689	0.52	0.247	1.05235e-56	1
CG3764	1.42445e-60	1.22127	0.474	0.212	1.69923e-56	1
Svil	2.23723e-60	-1.37921	0.377	0.633	2.66879e-56	1
bnl	2.48313e-60	-2.21356	0.139	0.421	2.96213e-56	1
baf	3.38522e-60	-1.70334	0.039	0.287	4.03823e-56	1
DnaJ-1	3.7546e-60	-1.23326	0.341	0.629	4.47886e-56	1
CG6067	4.32442e-60	1.0775	0.515	0.241	5.1586e-56	1
baz	6.12089e-60	-1.48969	0.063	0.321	7.3016e-56	1
CAH7	2.69009e-59	1.38097	0.315	0.093	3.209e-55	1
AGBE	5.19189e-59	1.21269	0.257	0.059	6.1934e-55	1
Gadd45	8.32729e-59	-1.4965	0.06	0.317	9.93362e-55	1
CG31678	1.37181e-58	-1.49485	0.05	0.304	1.63644e-54	1
Atg18b	1.63643e-58	-1.32256	0.25	0.539	1.95209e-54	1
CG5958	2.50314e-58	-1.47176	0.225	0.505	2.98599e-54	1
Lsd-2	2.97046e-58	0.799556	0.899	0.779	3.54346e-54	1
l(3)80Fg	6.74357e-58	0.839139	0.762	0.537	8.04441e-54	1
Blimp-1	9.56666e-58	0.865326	0.823	0.638	1.14121e-53	1
hdc	2.25958e-57	-1.72842	0.035	0.272	2.69545e-53	1
Cyp6d5	2.38741e-57	1.24105	0.519	0.262	2.84794e-53	1
Cyp28a5	2.6792e-57	-1.43416	0.024	0.257	3.19602e-53	1
Rpn1	4.55565e-57	-1.3063	0.064	0.32	5.43444e-53	1
Atg8a	6.77806e-57	-0.990162	0.557	0.761	8.08554e-53	1
jvl	1.04394e-56	-0.979535	0.627	0.81	1.24531e-52	1
EDTP	1.0925e-56	1.14494	0.508	0.256	1.30324e-52	1
wrd	1.44798e-56	0.936214	0.609	0.357	1.72729e-52	1
Gdh	1.73045e-56	-1.43654	0.197	0.477	2.06425e-52	1
GstE8	4.71049e-56	-1.50712	0.041	0.282	5.61914e-52	1
Lk6	5.79013e-56	-0.757798	0.842	0.923	6.90704e-52	1
Desat1	6.28758e-56	0.6054	0.971	0.854	7.50045e-52	1
mdy	1.42608e-55	1.14985	0.309	0.091	1.70117e-51	1
AdamTS-A	1.69492e-55	1.45256	0.436	0.19	2.02188e-51	1
CycG	2.07674e-55	-0.641758	0.922	0.96	2.47734e-51	1
CG8665	2.33075e-55	1.50509	0.359	0.13	2.78036e-51	1
CG5910	2.42903e-55	1.00682	0.573	0.312	2.89759e-51	1
Gprk2	9.24155e-55	-1.05775	0.566	0.76	1.10242e-50	1
CG15293	9.72732e-55	0.986602	0.616	0.364	1.16037e-50	1
Cyp6w1	1.78227e-54	1.2271	0.371	0.14	2.12606e-50	1
Cam	2.01922e-54	-0.836845	0.697	0.881	2.40873e-50	1
Irc	5.59058e-54	-1.05916	0.335	0.604	6.66901e-50	1
Gk2	7.79303e-54	1.15598	0.323	0.107	9.2963e-50	1
Exn	7.90447e-54	-1.13163	0.332	0.593	9.42924e-50	1
Cyp309a1	2.53583e-53	-1.21938	0.071	0.321	3.02499e-49	1
NUCB1	2.62006e-53	-1.52512	0.066	0.304	3.12547e-49	1
Lip4	2.83226e-53	-1.26645	0.221	0.5	3.3786e-49	1
CG32767	3.16746e-53	0.978641	0.556	0.304	3.77846e-49	1
CG3168	4.65557e-53	-1.34464	0.12	0.38	5.55363e-49	1
Pdfr	4.67686e-53	0.912274	0.649	0.393	5.57902e-49	1
CG17549	5.64583e-53	1.0572	0.537	0.292	6.73491e-49	1
Prosalpha2	8.7147e-53	-1.33589	0.067	0.306	1.03958e-48	1
aay	1.00387e-52	-0.947099	0.364	0.659	1.19752e-48	1
shrb	1.36476e-52	-1.24834	0.117	0.375	1.62802e-48	1
CG1416	1.88494e-52	-1.36142	0.035	0.257	2.24854e-48	1
CG6870	2.02509e-52	-1.59139	0.049	0.281	2.41573e-48	1
Smr	3.95297e-52	0.692063	0.882	0.683	4.7155e-48	1
CG9932	4.31599e-52	0.578147	0.987	0.929	5.14855e-48	1
Prosbeta5	9.08932e-52	-1.2978	0.06	0.294	1.08427e-47	1
Prosalpha7	3.15871e-51	-1.22954	0.063	0.295	3.76803e-47	1
Prosalpha5	3.27318e-51	-1.27527	0.042	0.265	3.90458e-47	1
Smg6	3.78281e-51	-1.31763	0.066	0.302	4.51252e-47	1
Rpn3	5.94187e-51	-1.2241	0.05	0.278	7.08806e-47	1
CG6115	1.04198e-50	-1.03212	0.243	0.52	1.24297e-46	1
Msp300	2.57822e-50	0.591945	0.952	0.847	3.07556e-46	1
Rpn9	5.35477e-50	-1.30185	0.039	0.255	6.3877e-46	1
dos	5.94059e-50	-1.43699	0.04	0.259	7.08653e-46	1
fus	8.65159e-50	0.918778	0.557	0.322	1.03205e-45	1
lilli	9.84105e-50	0.658832	0.853	0.671	1.17394e-45	1
rgn	1.21397e-49	-1.69767	0.302	0.538	1.44814e-45	1
LRP1	1.23558e-49	1.10002	0.587	0.346	1.47392e-45	1
Acbp2	1.92512e-49	1.06399	0.476	0.233	2.29648e-45	1
GstE7	2.02442e-49	-1.30612	0.038	0.255	2.41493e-45	1
tkv	2.09596e-49	1.10883	0.545	0.318	2.50027e-45	1
CG16756	2.50894e-49	1.03109	0.299	0.096	2.99292e-45	1
Ctl2	3.12368e-49	-1.28247	0.041	0.259	3.72623e-45	1
Rpt3	3.14916e-49	-1.19476	0.053	0.279	3.75663e-45	1
alt	4.14073e-49	-1.26784	0.188	0.442	4.93948e-45	1
CG2233	1.08827e-48	0.537517	0.971	0.887	1.2982e-44	1
Galk	1.29989e-48	0.968684	0.651	0.429	1.55064e-44	1
Ist1	1.37447e-48	-1.14279	0.13	0.377	1.63961e-44	1
Tlk	1.38085e-48	0.777283	0.716	0.491	1.64722e-44	1
Nadsyn	1.82729e-48	1.07556	0.435	0.213	2.17977e-44	1
mld	3.02717e-48	-1.41327	0.138	0.391	3.61112e-44	1
myo	3.08287e-48	0.92523	0.547	0.312	3.67756e-44	1
msn	3.86524e-48	-1.01025	0.434	0.66	4.61084e-44	1
Ire1	4.52213e-48	-1.11298	0.146	0.401	5.39445e-44	1
DppIII	4.78499e-48	-1.22059	0.05	0.265	5.70802e-44	1
CG9691	7.70905e-48	0.892254	0.507	0.263	9.19613e-44	1
LPCAT	7.89725e-48	-1.26257	0.056	0.278	9.42064e-44	1
CG11594	1.45348e-47	1.08732	0.346	0.135	1.73386e-43	1
MCPH1	1.47661e-47	-1.19843	0.149	0.397	1.76145e-43	1
CG31704	2.26175e-47	-1.31792	0.071	0.295	2.69804e-43	1
Rpn8	2.32605e-47	-1.17454	0.045	0.257	2.77474e-43	1
Ntan1	2.99514e-47	-1.00436	0.45	0.682	3.57291e-43	1
CG15099	3.26697e-47	-1.14446	0.132	0.378	3.89716e-43	1
Hsc70-5	3.98862e-47	-1.2352	0.119	0.362	4.75802e-43	1
ALiX	5.2372e-47	-1.12975	0.072	0.3	6.24745e-43	1
sima	6.10825e-47	0.593627	0.967	0.907	7.28653e-43	1
SCaMC	1.41774e-46	-0.764493	0.649	0.822	1.69122e-42	1
h	1.52779e-46	-1.06918	0.486	0.707	1.8225e-42	1
CG32486	1.54253e-46	0.924313	0.618	0.406	1.84008e-42	1
CG43340	4.40024e-46	0.974723	0.563	0.342	5.24904e-42	1
CG12290	1.11382e-45	-1.44518	0.119	0.355	1.32868e-41	1
chb	1.13642e-45	-1.27499	0.135	0.372	1.35564e-41	1
MCU	1.18098e-45	-1.24302	0.126	0.364	1.40879e-41	1
Ilp6	1.35981e-45	1.15866	0.461	0.236	1.62212e-41	1
caps	1.47541e-45	-1.03606	0.334	0.583	1.76001e-41	1
CG17278	3.08981e-45	-1.18313	0.132	0.37	3.68584e-41	1
Rpt6	5.36628e-45	-1.15816	0.058	0.269	6.40143e-41	1
CG5966	2.13406e-44	-1.067	0.28	0.536	2.54572e-40	1
wdp	4.27067e-44	-1.23214	0.151	0.393	5.09448e-40	1
Arf79F	8.1223e-44	-0.984543	0.33	0.56	9.68909e-40	1
CG6330	9.61046e-44	-1.1748	0.135	0.374	1.14643e-39	1
CHES-1-like	1.39686e-43	0.899058	0.619	0.415	1.66631e-39	1
Jafrac1	1.46165e-43	-1.00189	0.227	0.473	1.7436e-39	1
Chmp1	1.89651e-43	-1.30459	0.079	0.291	2.26235e-39	1
CG33493	2.04466e-43	1.05856	0.364	0.155	2.43908e-39	1
step	2.07761e-43	-1.01479	0.27	0.518	2.47838e-39	1
RhoGAP71E	2.342e-43	-1.17541	0.267	0.505	2.79377e-39	1
Caper	2.52989e-43	0.755297	0.781	0.617	3.01791e-39	1
CG13868	2.56345e-43	0.671706	0.841	0.7	3.05794e-39	1
CG3348	2.63444e-43	1.87486	0.296	0.11	3.14262e-39	1
pum	2.78945e-43	0.596405	0.694	0.461	3.32754e-39	1
Cyp18a1	3.49294e-43	1.10522	0.313	0.118	4.16673e-39	1
ScsbetaA	4.10258e-43	0.798373	0.627	0.41	4.89397e-39	1
Hsp60A	7.95344e-43	-1.12907	0.095	0.314	9.48766e-39	1
Pisd	1.04629e-42	0.988127	0.269	0.088	1.24813e-38	1
red	1.24986e-42	-1.31784	0.066	0.273	1.49096e-38	1
poe	1.28032e-42	-1.0706	0.179	0.419	1.5273e-38	1
Cyp6g1	2.19825e-42	0.971999	0.544	0.333	2.6223e-38	1
CG7945	2.57854e-42	-1.41948	0.095	0.308	3.07594e-38	1
aralar1	2.64701e-42	-0.775246	0.489	0.706	3.15762e-38	1
Spn43Ab	4.98615e-42	0.896176	0.511	0.287	5.94798e-38	1
Agpat3	5.83989e-42	0.966381	0.312	0.12	6.96641e-38	1
SP1173	7.1968e-42	-1.37699	0.058	0.259	8.58506e-38	1
GstE12	8.04724e-42	0.873896	0.395	0.183	9.59955e-38	1
CCT2	9.14733e-42	-1.16383	0.11	0.329	1.09118e-37	1
CG15120	1.05478e-41	1.02097	0.258	0.084	1.25824e-37	1
Gclm	1.33865e-41	-1.33219	0.206	0.438	1.59687e-37	1
Rbfox1	2.14777e-41	0.792774	0.658	0.446	2.56207e-37	1
MFS17	3.15684e-41	0.625058	0.812	0.638	3.7658e-37	1
CG32425	3.49744e-41	0.950205	0.475	0.262	4.17209e-37	1
CG34054	6.18838e-41	-1.10171	0.055	0.256	7.38211e-37	1
uex	8.76128e-41	0.652846	0.786	0.616	1.04513e-36	1
ATPCL	1.1956e-40	0.99307	0.553	0.34	1.42624e-36	1
EcR	1.34216e-40	0.855661	0.606	0.403	1.60106e-36	1
zormin	1.55608e-40	-1.03635	0.251	0.489	1.85625e-36	1
Plod	2.77862e-40	-1.14361	0.135	0.356	3.31462e-36	1
Zasp52	2.98921e-40	1.25071	0.296	0.116	3.56583e-36	1
Nep4	3.06922e-40	-1.20739	0.08	0.288	3.66127e-36	1
Pak3	3.10261e-40	-1.09779	0.141	0.361	3.7011e-36	1
GstE9	4.74773e-40	-1.13193	0.109	0.325	5.66357e-36	1
Swip-1	5.94614e-40	-0.98027	0.238	0.481	7.09315e-36	1
RasGAP1	6.71658e-40	-1.13562	0.131	0.35	8.01221e-36	1
larp	7.38641e-40	0.876779	0.697	0.532	8.81124e-36	1
maf-S	4.66601e-39	-1.22702	0.07	0.266	5.56608e-35	1
goe	1.31349e-38	1.04398	0.408	0.204	1.56687e-34	1
pes	2.01426e-38	-1.1041	0.193	0.414	2.40281e-34	1
shf	2.04198e-38	1.00275	0.276	0.101	2.43588e-34	1
mew	3.71995e-38	1.21036	0.52	0.325	4.43753e-34	1
Lapsyn	3.74711e-38	0.918712	0.297	0.117	4.46992e-34	1
Khc-73	4.89317e-38	-1.1329	0.224	0.446	5.83707e-34	1
tsr	6.18147e-38	-1.08569	0.114	0.317	7.37387e-34	1
CG31694	2.22748e-37	-1.32141	0.233	0.446	2.65716e-33	1
Cyp28d1	4.95652e-37	-0.972732	0.084	0.285	5.91264e-33	1
Map205	5.89154e-37	1.05692	0.638	0.493	7.02802e-33	1
Ubc6	6.8701e-37	-0.998562	0.13	0.339	8.19534e-33	1
ctp	3.44003e-36	-1.22798	0.156	0.359	4.10361e-32	1
Gbp3	3.77513e-36	0.904059	0.398	0.204	4.50335e-32	1
CG9449	4.08201e-36	0.951869	0.34	0.155	4.86943e-32	1
hzg	4.86217e-36	0.860827	0.433	0.238	5.80008e-32	1
Sam-S	5.06105e-36	0.99071	0.721	0.561	6.03732e-32	1
blot	9.47772e-36	-0.975786	0.245	0.473	1.1306e-31	1
Wbp2	1.22146e-35	-0.901211	0.188	0.409	1.45708e-31	1
NK7.1	1.25292e-35	-1.04488	0.094	0.295	1.49461e-31	1
CG10621	1.52814e-35	1.03806	0.402	0.203	1.82292e-31	1
GramD1B	2.07201e-35	-0.790905	0.408	0.623	2.4717e-31	1
Ubqn	3.91892e-35	-0.957669	0.121	0.322	4.67488e-31	1
Fmo-2	4.09022e-35	-1.18839	0.102	0.295	4.87923e-31	1
robo2	5.76643e-35	-1.11075	0.28	0.492	6.87877e-31	1
Pfrx	8.09977e-35	0.852517	0.429	0.232	9.66222e-31	1
IM14	1.38875e-34	0.458128	0.337	0.146	1.65664e-30	1
Aldh-III	2.50847e-34	0.810161	0.276	0.11	2.99236e-30	1
CG6428	8.96906e-34	-1.0156	0.138	0.338	1.06992e-29	1
S6k	1.01341e-33	0.751877	0.6	0.421	1.2089e-29	1
Pp1alpha-96A	1.56662e-33	0.696088	0.703	0.531	1.86882e-29	1
CG12065	3.71853e-33	-1.01812	0.159	0.362	4.43584e-29	1
mura	5.72671e-33	0.772173	0.616	0.446	6.83139e-29	1
Tl	6.32053e-33	-0.751648	0.454	0.659	7.53977e-29	1
IM33	1.02816e-32	0.770128	0.501	0.303	1.22649e-28	1
eIF4A	1.12209e-32	-0.747807	0.484	0.666	1.33854e-28	1
Oatp30B	1.46281e-32	0.751117	0.69	0.536	1.74498e-28	1
Pdp1	1.83741e-32	0.352432	0.999	0.99	2.19184e-28	1
glec	1.9478e-32	-0.979244	0.221	0.432	2.32354e-28	1
Atg13	2.15109e-32	0.921137	0.321	0.153	2.56603e-28	1
cac	2.16605e-32	-1.21216	0.317	0.523	2.58388e-28	1
Yeti	2.27444e-32	-0.744326	0.477	0.682	2.71318e-28	1
crc	2.8375e-32	-0.87201	0.232	0.443	3.38486e-28	1
l(1)G0289	3.87698e-32	-0.780832	0.328	0.545	4.62485e-28	1
Pcyt1	4.0394e-32	-0.795034	0.335	0.552	4.81861e-28	1
CG15784	4.27603e-32	-0.953929	0.108	0.298	5.10087e-28	1
Prat2	4.41489e-32	-0.728178	0.624	0.779	5.26653e-28	1
sgg	4.8185e-32	0.478009	0.962	0.942	5.74799e-28	1
nrv1	5.16647e-32	-1.05126	0.124	0.311	6.16308e-28	1
ogre	8.72471e-32	0.796116	0.387	0.201	1.04077e-27	1
CG8679	8.91446e-32	-1.01471	0.081	0.257	1.06341e-27	1
corto	9.00239e-32	0.863215	0.599	0.432	1.0739e-27	1
GstE3	1.01053e-31	-1.04313	0.088	0.266	1.20546e-27	1
cnn	1.30614e-31	-0.983035	0.149	0.339	1.55809e-27	1
path	1.3814e-31	0.628906	0.919	0.872	1.64788e-27	1
CG2991	1.83345e-31	-1.10763	0.082	0.255	2.18712e-27	1
PRL-1	2.35461e-31	-0.969485	0.169	0.364	2.80882e-27	1
Rab11	2.48093e-31	-0.878952	0.228	0.434	2.9595e-27	1
CG12012	3.96801e-31	-1.00488	0.148	0.339	4.73344e-27	1
Ahcy	6.66979e-31	-0.837294	0.161	0.359	7.95639e-27	1
CG11267	1.39743e-30	-0.98267	0.083	0.253	1.667e-26	1
KrT95D	1.51566e-30	-0.842215	0.597	0.727	1.80803e-26	1
jim	2.12033e-30	0.661267	0.632	0.459	2.52934e-26	1
lqf	2.73451e-30	-0.83656	0.446	0.615	3.26199e-26	1
Cka	3.01484e-30	0.815484	0.439	0.259	3.5964e-26	1
Dic1	3.13886e-30	0.971122	0.302	0.14	3.74435e-26	1
Tab2	3.40709e-30	-0.807265	0.268	0.472	4.06431e-26	1
Cyp4g1	4.72577e-30	-0.694628	0.224	0.441	5.63737e-26	1
ssp7	1.02708e-29	0.686845	0.588	0.394	1.2252e-25	1
ninaE	1.79582e-29	-0.858306	0.122	0.306	2.14223e-25	1
siz	2.08239e-29	-0.878916	0.343	0.533	2.48408e-25	1
ckn	3.00917e-29	-0.841164	0.21	0.409	3.58964e-25	1
Hex-C	3.44477e-29	0.708085	0.566	0.386	4.10927e-25	1
nmo	3.52675e-29	-0.686473	0.44	0.644	4.20706e-25	1
Obp99c	3.94764e-29	0.475689	0.844	0.708	4.70914e-25	1
cdi	4.32271e-29	-0.87842	0.264	0.469	5.15656e-25	1
CG42663	4.99051e-29	0.866667	0.394	0.22	5.95318e-25	1
nej	8.49586e-29	0.646305	0.626	0.459	1.01347e-24	1
kst	8.89176e-29	1.09395	0.397	0.233	1.0607e-24	1
CG1640	1.07733e-28	0.812622	0.385	0.211	1.28515e-24	1
Rab5	1.28821e-28	-0.828044	0.217	0.411	1.5367e-24	1
kibra	1.48104e-28	-0.833279	0.307	0.513	1.76673e-24	1
Odc1	1.77336e-28	0.775458	0.264	0.114	2.11544e-24	1
scb	1.80113e-28	-1.08738	0.086	0.251	2.14857e-24	1
hts	1.98707e-28	-0.692429	0.354	0.554	2.37037e-24	1
Npl4	2.27567e-28	-0.798083	0.1	0.272	2.71465e-24	1
CG11400	2.33111e-28	0.694676	0.508	0.325	2.78079e-24	1
shep	3.09862e-28	0.472923	0.83	0.708	3.69635e-24	1
l(3)L1231	3.99994e-28	0.638841	0.683	0.545	4.77153e-24	1
Npc2g	4.10604e-28	0.7641	0.464	0.288	4.89809e-24	1
comm2	4.7576e-28	-1.07803	0.145	0.321	5.67534e-24	1
Nha2	5.61514e-28	0.810028	0.26	0.113	6.6983e-24	1
CG31523	6.5101e-28	-0.846057	0.146	0.321	7.7659e-24	1
Zip99C	8.24228e-28	-0.903067	0.087	0.252	9.83222e-24	1
lbk	8.75973e-28	-0.956336	0.147	0.326	1.04495e-23	1
Idgf4	1.03282e-27	-0.892325	0.17	0.347	1.23205e-23	1
yuri	1.10302e-27	-0.832151	0.182	0.37	1.31579e-23	1
kirre	1.28208e-27	0.787883	0.297	0.139	1.5294e-23	1
eEF1alpha1	1.92929e-27	-0.422686	0.858	0.934	2.30145e-23	1
CG5773	2.14587e-27	-1.17093	0.118	0.287	2.55981e-23	1
CG3902	2.45178e-27	0.967286	0.418	0.253	2.92473e-23	1
CG12004	3.07745e-27	-0.877215	0.149	0.328	3.67109e-23	1
CG31705	3.27877e-27	-0.625032	0.447	0.631	3.91125e-23	1
CG14762	3.31066e-27	0.720937	0.513	0.335	3.94928e-23	1
CG43078	4.05371e-27	0.802964	0.285	0.134	4.83567e-23	1
CG32066	7.80809e-27	-0.729544	0.307	0.501	9.31427e-23	1
CG12116	1.12075e-26	0.798793	0.519	0.36	1.33694e-22	1
Uba1	1.47231e-26	-0.874159	0.093	0.253	1.75632e-22	1
Galt	1.99053e-26	0.757847	0.326	0.165	2.3745e-22	1
D2hgdh	2.1468e-26	0.746784	0.419	0.25	2.56092e-22	1
Dif	2.49789e-26	0.580503	0.511	0.336	2.97973e-22	1
Parp	2.74342e-26	0.517705	0.773	0.633	3.27263e-22	1
IscU	2.99897e-26	-0.673047	0.289	0.488	3.57747e-22	1
Nup358	3.03105e-26	-0.876452	0.122	0.292	3.61574e-22	1
CG42672	4.1992e-26	0.769403	0.314	0.16	5.00922e-22	1
pyd	4.20111e-26	0.716504	0.667	0.519	5.01151e-22	1
CG4297	4.45884e-26	0.73515	0.343	0.185	5.31895e-22	1
scu	5.5418e-26	0.723143	0.317	0.161	6.61082e-22	1
puml	6.8173e-26	-0.813056	0.102	0.265	8.13236e-22	1
eIF3c	6.87055e-26	-0.781111	0.111	0.274	8.19588e-22	1
CG11537	7.38263e-26	-0.910745	0.097	0.256	8.80675e-22	1
Lis-1	8.20702e-26	-0.759796	0.239	0.427	9.79015e-22	1
ATPsynC	8.98372e-26	0.666271	0.568	0.405	1.07167e-21	1
psq	9.79277e-26	0.590678	0.623	0.454	1.16818e-21	1
eEF2	1.26035e-25	-0.498217	0.675	0.796	1.50347e-21	1
GstT4	1.26542e-25	0.988543	0.444	0.29	1.50951e-21	1
Rab7	1.33934e-25	-0.760808	0.178	0.359	1.5977e-21	1
gw	1.34695e-25	0.599501	0.65	0.515	1.60678e-21	1
CG18659	1.36917e-25	-0.863623	0.145	0.315	1.63329e-21	1
Nop17l	2.56443e-25	-0.886099	0.294	0.473	3.05911e-21	1
bgm	2.63408e-25	0.674774	0.737	0.586	3.1422e-21	1
Letm1	2.67611e-25	-0.8654	0.147	0.318	3.19233e-21	1
trx	3.19798e-25	0.630786	0.601	0.45	3.81487e-21	1
CG44008	3.52671e-25	-0.789458	0.143	0.312	4.20702e-21	1
Sodh-1	3.77238e-25	0.737415	0.408	0.241	4.50007e-21	1
osp	4.4981e-25	0.659083	0.435	0.26	5.36578e-21	1
Csk	4.93916e-25	0.687381	0.585	0.429	5.89192e-21	1
kek5	5.1012e-25	0.419523	0.716	0.545	6.08522e-21	1
Oatp74D	7.81344e-25	0.663997	0.476	0.304	9.32065e-21	1
Mnt	8.82665e-25	0.572961	0.632	0.47	1.05293e-20	1
CG10600	1.09724e-24	-0.814124	0.109	0.27	1.3089e-20	1
Pur-alpha	1.1821e-24	0.612677	0.556	0.397	1.41013e-20	1
CG6051	1.27471e-24	-0.516022	0.414	0.609	1.5206e-20	1
Syx1A	1.84963e-24	-0.75385	0.436	0.603	2.20643e-20	1
srp	2.30865e-24	0.592209	0.71	0.593	2.75399e-20	1
CG34417	3.19586e-24	-0.527079	0.49	0.677	3.81234e-20	1
Lmpt	4.66832e-24	-0.735583	0.334	0.51	5.56883e-20	1
Eb1	5.03322e-24	-0.774482	0.138	0.303	6.00413e-20	1
flw	5.15168e-24	-0.682823	0.294	0.482	6.14543e-20	1
su(w[a])	7.07011e-24	0.751304	0.251	0.119	8.43394e-20	1
PAPLA1	1.42445e-23	-0.68242	0.375	0.552	1.69923e-19	1
Akr1B	1.67793e-23	-0.812127	0.133	0.294	2.0016e-19	1
ced-6	1.74298e-23	0.643989	0.578	0.429	2.0792e-19	1
CG10960	1.85012e-23	0.649822	0.857	0.821	2.20701e-19	1
tsl	2.03666e-23	0.807138	0.25	0.117	2.42954e-19	1
CG42238	2.24307e-23	0.69031	0.489	0.334	2.67576e-19	1
Efa6	2.61349e-23	-0.795686	0.179	0.346	3.11763e-19	1
Idgf6	2.82716e-23	0.747788	0.302	0.159	3.37252e-19	1
CG10433	3.31315e-23	0.5396	0.741	0.645	3.95226e-19	1
Mst84Da	3.6926e-23	-0.883089	0.207	0.376	4.40491e-19	1
CrebA	4.34845e-23	-1.24552	0.148	0.304	5.18726e-19	1
rl	6.36944e-23	0.322933	0.946	0.874	7.59811e-19	1
Cyp6v1	9.65997e-23	0.771921	0.264	0.128	1.15234e-18	1
Ald1	1.08895e-22	-0.522063	0.842	0.902	1.29901e-18	1
pan	1.31199e-22	0.653423	0.657	0.534	1.56508e-18	1
PMCA	1.32009e-22	0.477007	0.685	0.532	1.57474e-18	1
Kr-h1	1.34886e-22	-0.639127	0.351	0.528	1.60905e-18	1
BomBc2	1.43222e-22	0.359735	0.661	0.507	1.70849e-18	1
Tps1	1.4368e-22	0.341804	0.967	0.93	1.71396e-18	1
mys	3.4714e-22	-0.77144	0.278	0.448	4.14104e-18	1
Gel	3.49519e-22	0.647412	0.557	0.414	4.16941e-18	1
RpL23	4.3189e-22	-0.622803	0.595	0.741	5.15202e-18	1
ens	4.87402e-22	-0.622166	0.38	0.543	5.81422e-18	1
Vha16-1	5.57456e-22	-0.499421	0.685	0.809	6.6499e-18	1
Bruce	5.88291e-22	-0.668563	0.259	0.426	7.01772e-18	1
Gnmt	7.03432e-22	0.58397	0.728	0.605	8.39124e-18	1
Syb	7.53135e-22	-0.724792	0.207	0.373	8.98415e-18	1
Pli	7.61034e-22	0.75264	0.645	0.525	9.07838e-18	1
Cf2	9.40068e-22	0.651307	0.448	0.301	1.12141e-17	1
foxo	9.48252e-22	0.452193	0.815	0.701	1.13117e-17	1
CAH1	1.01975e-21	0.675219	0.361	0.208	1.21646e-17	1
MSBP	1.07155e-21	-0.689955	0.179	0.338	1.27825e-17	1
CG3638	1.07613e-21	0.650089	0.575	0.429	1.28372e-17	1
scrib	1.26921e-21	0.688559	0.471	0.33	1.51404e-17	1
Clk	1.29406e-21	0.683226	0.331	0.187	1.54369e-17	1
BomS3	1.75889e-21	0.282535	0.544	0.378	2.09818e-17	1
CG6910	2.39531e-21	-0.746557	0.697	0.789	2.85736e-17	1
Ets98B	3.30164e-21	0.539291	0.609	0.467	3.93853e-17	1
Hnf4	3.69804e-21	0.587979	0.718	0.608	4.41139e-17	1
Golgin245	3.85859e-21	-0.7003	0.12	0.269	4.60291e-17	1
CG42369	5.07573e-21	0.692655	0.319	0.179	6.05484e-17	1
Kank	7.20656e-21	0.600637	0.25	0.121	8.5967e-17	1
PyK	8.23297e-21	0.732512	0.396	0.258	9.8211e-17	1
shn	1.07189e-20	-0.564668	0.522	0.664	1.27866e-16	1
mei-P26	1.24808e-20	0.576764	0.538	0.387	1.48883e-16	1
sqd	1.29525e-20	0.388669	0.895	0.803	1.54511e-16	1
chrb	1.29661e-20	-0.990257	0.14	0.281	1.54673e-16	1
Flo2	2.28465e-20	-0.760123	0.193	0.355	2.72536e-16	1
CD98hc	2.47271e-20	-0.756276	0.125	0.27	2.94969e-16	1
CG15098	3.71862e-20	-0.676014	0.28	0.441	4.43594e-16	1
Gbs-76A	3.91887e-20	0.601401	0.515	0.363	4.67482e-16	1
vri	4.26102e-20	-0.74778	0.4	0.55	5.08296e-16	1
swm	4.55924e-20	-0.786712	0.224	0.38	5.43872e-16	1
kraken	5.09192e-20	-0.706424	0.137	0.283	6.07415e-16	1
Nedd4	5.33685e-20	-0.67398	0.224	0.385	6.36633e-16	1
CG14073	6.30779e-20	-0.644035	0.29	0.451	7.52456e-16	1
drongo	6.94722e-20	-0.762767	0.491	0.624	8.28734e-16	1
sws	7.27762e-20	0.712838	0.38	0.24	8.68147e-16	1
stx	9.6802e-20	0.689842	0.487	0.351	1.15475e-15	1
CG4199	1.39608e-19	-0.643269	0.142	0.291	1.66539e-15	1
CG1943	1.59877e-19	-0.714461	0.118	0.258	1.90717e-15	1
CG6145	1.87133e-19	0.829329	0.527	0.401	2.23231e-15	1
lost	1.93627e-19	-0.648385	0.281	0.446	2.30978e-15	1
kis	2.22236e-19	0.433604	0.769	0.664	2.65105e-15	1
Set1	2.24693e-19	-0.647483	0.243	0.402	2.68036e-15	1
ap	2.3829e-19	0.694913	0.436	0.297	2.84256e-15	1
Pdk1	2.44494e-19	-0.599516	0.686	0.754	2.91657e-15	1
CG42324	3.82801e-19	0.447658	0.724	0.599	4.56643e-15	1
Sin3A	4.02307e-19	0.540873	0.555	0.423	4.79912e-15	1
Gclc	4.30053e-19	-0.746864	0.425	0.582	5.1301e-15	1
sky	8.45545e-19	-1.00233	0.151	0.288	1.00865e-14	1
Shmt	8.98389e-19	-0.527492	0.509	0.666	1.07169e-14	1
RpL21	9.5641e-19	-0.511482	0.513	0.666	1.1409e-14	1
for	1.13739e-18	0.449814	0.793	0.71	1.3568e-14	1
tay	1.28572e-18	0.54453	0.508	0.368	1.53374e-14	1
CG7530	1.41447e-18	0.739252	0.388	0.26	1.68732e-14	1
CG17691	1.5103e-18	0.557364	0.537	0.409	1.80164e-14	1
PHGPx	1.85909e-18	-0.68033	0.273	0.428	2.21771e-14	1
Galphao	1.94894e-18	0.476546	0.649	0.514	2.32489e-14	1
Mmp2	2.27161e-18	-0.892818	0.126	0.258	2.70981e-14	1
anne	3.00824e-18	0.669126	0.346	0.219	3.58854e-14	1
CG9451	3.02688e-18	-0.904651	0.14	0.276	3.61077e-14	1
upSET	3.6098e-18	0.581186	0.502	0.377	4.30612e-14	1
CG43736	3.86763e-18	0.615822	0.419	0.282	4.61369e-14	1
RpL17	4.25166e-18	-0.5538	0.584	0.722	5.07181e-14	1
fs(1)h	4.50906e-18	0.430089	0.789	0.693	5.37886e-14	1
Atf3	4.70517e-18	-0.57237	0.193	0.344	5.61279e-14	1
Rbp1-like	5.12828e-18	0.641687	0.35	0.224	6.11752e-14	1
PlexA	1.01614e-17	-0.546918	0.333	0.489	1.21216e-13	1
daw	1.06193e-17	0.636182	0.482	0.344	1.26677e-13	1
RhoGAP15B	1.06978e-17	-0.688474	0.136	0.274	1.27614e-13	1
Lpin	1.08156e-17	-0.718999	0.381	0.531	1.2902e-13	1
spir	1.26966e-17	-0.597427	0.272	0.419	1.51458e-13	1
mts	1.41398e-17	-0.556904	0.268	0.421	1.68674e-13	1
CG8036	1.68415e-17	0.607949	0.447	0.309	2.00902e-13	1
Mcad	2.11607e-17	0.610212	0.294	0.166	2.52426e-13	1
Socs16D	2.80717e-17	0.570258	0.256	0.137	3.34867e-13	1
Rac2	4.40884e-17	-0.621268	0.212	0.357	5.2593e-13	1
tim	4.44384e-17	0.480107	0.693	0.597	5.30106e-13	1
Tango1	4.53255e-17	-0.588732	0.125	0.256	5.40688e-13	1
CG9044	7.0419e-17	0.636877	0.359	0.235	8.40029e-13	1
arg	8.2704e-17	0.71417	0.27	0.155	9.86576e-13	1
Sh3beta	9.65326e-17	-0.597518	0.12	0.25	1.15154e-12	1
sowah	1.18131e-16	-0.655856	0.23	0.377	1.40918e-12	1
bic	1.25226e-16	-0.5584	0.295	0.442	1.49383e-12	1
wdb	1.40348e-16	0.433838	0.724	0.616	1.67421e-12	1
Rab1	1.60094e-16	-0.565491	0.214	0.358	1.90976e-12	1
RpL3	1.82961e-16	-0.454991	0.55	0.688	2.18255e-12	1
Rap1	2.36012e-16	0.506504	0.58	0.455	2.81539e-12	1
CG12163	2.4743e-16	0.57733	0.572	0.469	2.95159e-12	1
Cat	2.78895e-16	-0.625307	0.255	0.395	3.32694e-12	1
Stam	3.45778e-16	-0.556928	0.18	0.321	4.12478e-12	1
CG32276	4.94325e-16	-0.58465	0.198	0.336	5.8968e-12	1
CG14478	6.23568e-16	-0.510556	0.415	0.56	7.43854e-12	1
CG31689	7.57637e-16	0.433645	0.739	0.647	9.03785e-12	1
eas	9.08616e-16	0.496875	0.556	0.428	1.08389e-11	1
CARPB	9.23965e-16	0.617924	0.28	0.163	1.1022e-11	1
CG31145	1.0547e-15	0.413425	0.784	0.709	1.25815e-11	1
alpha-Man-Ia	1.31945e-15	0.564021	0.443	0.32	1.57397e-11	1
CG1979	1.46178e-15	0.898393	0.26	0.154	1.74376e-11	1
mam	2.16239e-15	0.527146	0.473	0.346	2.57951e-11	1
AGO1	2.33466e-15	0.416739	0.682	0.577	2.78502e-11	1
kra	2.47721e-15	-0.436186	0.445	0.598	2.95506e-11	1
Mitf	2.84972e-15	0.498675	0.38	0.256	3.39943e-11	1
CG42514	3.39284e-15	0.620521	0.27	0.158	4.04731e-11	1
RpL18A	3.74506e-15	-0.532005	0.539	0.661	4.46749e-11	1
CG7220	4.2756e-15	0.618458	0.306	0.191	5.10037e-11	1
rdx	5.53178e-15	0.425486	0.664	0.564	6.59886e-11	1
Ubi-p5E	5.78815e-15	-0.577968	0.181	0.311	6.90468e-11	1
Su(var)2-HP2	6.66319e-15	-0.659053	0.159	0.282	7.94852e-11	1
RhoGAP68F	7.12478e-15	-0.584218	0.14	0.262	8.49915e-11	1
Diap1	8.75718e-15	-0.498085	0.7	0.771	1.04464e-10	1
slmb	8.88754e-15	-0.582284	0.13	0.251	1.0602e-10	1
noc	9.34005e-15	-0.702903	0.137	0.253	1.11417e-10	1
Mpcp2	1.12559e-14	0.553713	0.293	0.182	1.34272e-10	1
Not1	1.21118e-14	-0.379445	0.679	0.776	1.44481e-10	1
ci	1.5169e-14	0.582108	0.26	0.152	1.8095e-10	1
olf186-M	1.69869e-14	0.464652	0.501	0.363	2.02637e-10	1
RpS27	1.74241e-14	-0.492236	0.587	0.689	2.07852e-10	1
CG12091	1.83915e-14	0.560167	0.268	0.161	2.19392e-10	1
Trp1	2.08091e-14	-0.633299	0.154	0.275	2.48232e-10	1
BuGZ	2.62581e-14	0.556966	0.264	0.158	3.13233e-10	1
l(3)05822	2.8177e-14	-0.623623	0.131	0.25	3.36123e-10	1
RpS11	3.52392e-14	-0.50769	0.539	0.67	4.20369e-10	1
MESK2	3.78918e-14	-0.593733	0.263	0.393	4.52012e-10	1
lolal	3.97445e-14	0.596968	0.379	0.271	4.74112e-10	1
UK114	4.24927e-14	0.540921	0.496	0.383	5.06895e-10	1
eEF5	5.22679e-14	-0.53507	0.449	0.587	6.23504e-10	1
18w	6.67693e-14	0.623314	0.276	0.17	7.96491e-10	1
tai	6.82662e-14	0.316811	0.874	0.835	8.14347e-10	1
dco	7.51228e-14	-0.509618	0.207	0.341	8.9614e-10	1
CG12054	7.93533e-14	0.474788	0.465	0.351	9.46605e-10	1
RpL38	1.14206e-13	-0.57343	0.3	0.433	1.36236e-09	1
RpS10b	1.28195e-13	-0.473794	0.561	0.681	1.52924e-09	1
RpL37a	1.53038e-13	-0.49024	0.502	0.63	1.8256e-09	1
AGO2	1.81297e-13	-0.528214	0.155	0.275	2.1627e-09	1
RpL39	1.83265e-13	-0.576251	0.405	0.527	2.18617e-09	1
Ptpmeg	1.93576e-13	0.540603	0.604	0.509	2.30917e-09	1
Tob	1.94756e-13	0.603759	0.251	0.151	2.32325e-09	1
CG30015	2.21592e-13	-0.324508	0.726	0.82	2.64337e-09	1
RN-tre	2.27509e-13	-0.519049	0.137	0.253	2.71396e-09	1
RpS21	3.15166e-13	-0.563323	0.496	0.607	3.75961e-09	1
REPTOR	4.55153e-13	-0.475526	0.648	0.751	5.42952e-09	1
Imp	5.29383e-13	0.43731	0.666	0.576	6.31502e-09	1
sbb	5.93321e-13	0.307054	0.671	0.548	7.07772e-09	1
p23	5.98612e-13	-0.533072	0.167	0.279	7.14084e-09	1
Hrb27C	6.44244e-13	0.355533	0.802	0.729	7.68518e-09	1
Fis1	6.97633e-13	-0.57975	0.152	0.26	8.32206e-09	1
SPARC	7.2481e-13	0.460259	0.388	0.266	8.64626e-09	1
NAT1	8.33773e-13	-0.392148	0.625	0.729	9.94608e-09	1
Mkp3	8.89389e-13	0.574952	0.474	0.365	1.06095e-08	1
sdk	9.74712e-13	0.547487	0.271	0.17	1.16273e-08	1
Pcf11	1.12412e-12	0.500339	0.497	0.401	1.34097e-08	1
Treh	1.14624e-12	0.793198	0.27	0.176	1.36735e-08	1
RpL10	1.22464e-12	-0.410983	0.462	0.591	1.46087e-08	1
CG34136	1.58485e-12	-0.594767	0.193	0.312	1.89057e-08	1
RpL28	1.58678e-12	-0.446827	0.673	0.754	1.89288e-08	1
RpL34b	1.69019e-12	-0.496821	0.46	0.574	2.01622e-08	1
Ten-m	1.76715e-12	-0.73238	0.521	0.601	2.10803e-08	1
blw	1.77849e-12	0.50362	0.488	0.384	2.12156e-08	1
RpL31	2.26223e-12	-0.519985	0.51	0.62	2.69862e-08	1
Pkn	2.26256e-12	0.439241	0.632	0.552	2.69901e-08	1
Pect	2.49789e-12	0.40154	0.636	0.522	2.97973e-08	1
CG10077	2.54407e-12	0.370991	0.68	0.6	3.03482e-08	1
Cerk	3.42587e-12	-0.459745	0.235	0.362	4.08672e-08	1
RpL27	3.57389e-12	-0.486265	0.525	0.65	4.26329e-08	1
ctrip	3.58169e-12	-0.453167	0.294	0.418	4.2726e-08	1
Gs1	3.6346e-12	-0.457712	0.204	0.327	4.33571e-08	1
lap	3.95324e-12	0.524702	0.374	0.272	4.71582e-08	1
Tm1	4.17477e-12	0.332664	0.697	0.594	4.98008e-08	1
Oda	5.6446e-12	-0.410861	0.785	0.841	6.73344e-08	1
CG5946	5.74999e-12	0.565299	0.254	0.16	6.85917e-08	1
Paip2	6.57013e-12	0.655242	0.437	0.341	7.83751e-08	1
Sap-r	6.78002e-12	-0.430424	0.48	0.589	8.08788e-08	1
Itpr	6.80976e-12	0.496288	0.392	0.288	8.12336e-08	1
mtgo	7.42962e-12	-0.863499	0.193	0.3	8.86279e-08	1
RpS12	7.50033e-12	-0.465461	0.517	0.639	8.94714e-08	1
eIF4H1	7.53074e-12	0.570069	0.27	0.175	8.98342e-08	1
RpS30	7.90336e-12	-0.454817	0.443	0.565	9.42792e-08	1
spi	8.23439e-12	0.560139	0.276	0.181	9.8228e-08	1
Sfxn1-3	8.44822e-12	-0.470387	0.278	0.405	1.00779e-07	1
RpL7	8.49772e-12	-0.440081	0.521	0.648	1.01369e-07	1
Mapmodulin	1.00102e-11	0.507348	0.313	0.214	1.19411e-07	1
RpS25	1.09621e-11	-0.515276	0.499	0.613	1.30767e-07	1
Gale	1.15648e-11	0.459552	0.307	0.205	1.37956e-07	1
SREBP	1.17574e-11	-0.466646	0.335	0.458	1.40254e-07	1
RpLP1	1.22953e-11	-0.462362	0.551	0.669	1.46671e-07	1
Vha100-1	1.30393e-11	0.521156	0.279	0.184	1.55546e-07	1
DIP-alpha	1.41511e-11	0.516524	0.914	0.892	1.68808e-07	1
spin	1.67418e-11	0.426351	0.69	0.599	1.99713e-07	1
Cals	1.94248e-11	0.442864	0.348	0.242	2.31718e-07	1
mt:CoI	2.36156e-11	-0.495869	0.179	0.286	2.8171e-07	1
RpS15	2.45987e-11	-0.458482	0.616	0.712	2.93438e-07	1
bip2	2.54043e-11	0.42618	0.538	0.438	3.03048e-07	1
Paics	2.95678e-11	0.36341	0.817	0.768	3.52715e-07	1
fry	3.09988e-11	-0.538071	0.149	0.251	3.69784e-07	1
bbg	4.26546e-11	0.436901	0.409	0.303	5.08826e-07	1
Cyp1	4.43421e-11	-0.416327	0.312	0.431	5.28957e-07	1
SERCA	4.55936e-11	-0.431437	0.228	0.34	5.43886e-07	1
RpS5a	4.72145e-11	-0.402962	0.437	0.554	5.63222e-07	1
CG33494	4.73963e-11	-0.512254	0.246	0.356	5.65391e-07	1
cu	4.8445e-11	-0.41663	0.408	0.528	5.779e-07	1
Pfk	4.9305e-11	0.457246	0.293	0.197	5.88159e-07	1
GstS1	5.0692e-11	-0.530309	0.159	0.262	6.04704e-07	1
RpL32	5.57062e-11	-0.383667	0.556	0.667	6.6452e-07	1
CG3829	6.09741e-11	0.497718	0.389	0.293	7.2736e-07	1
CG44774	6.31749e-11	-0.570774	0.187	0.291	7.53614e-07	1
wb	6.3631e-11	-0.665596	0.266	0.375	7.59055e-07	1
sxc	6.50199e-11	0.480621	0.408	0.308	7.75623e-07	1
RpL14	6.77907e-11	-0.41087	0.6	0.705	8.08676e-07	1
CG17734	6.96366e-11	0.49415	0.317	0.223	8.30696e-07	1
CG30069	8.46895e-11	-0.594739	0.253	0.366	1.01026e-06	1
Nipped-B	8.80709e-11	-0.35269	0.698	0.776	1.0506e-06	1
rdgB	9.69367e-11	0.568479	0.275	0.183	1.15636e-06	1
RpL9	1.06503e-10	-0.392547	0.476	0.586	1.27048e-06	1
milt	1.15162e-10	0.451915	0.481	0.388	1.37377e-06	1
CG4080	1.25166e-10	-0.512077	0.2	0.307	1.49311e-06	1
Marf	1.26689e-10	0.506376	0.371	0.282	1.51127e-06	1
sno	1.33565e-10	-0.450699	0.171	0.28	1.5933e-06	1
l(3)80Fj	1.40952e-10	0.326226	0.795	0.733	1.68142e-06	1
Hsc70-3	1.4583e-10	-0.461468	0.33	0.451	1.7396e-06	1
Scamp	1.46722e-10	-0.420667	0.18	0.289	1.75024e-06	1
CG10799	1.4939e-10	-0.42065	0.422	0.543	1.78207e-06	1
CG42268	1.56682e-10	0.480209	0.522	0.445	1.86906e-06	1
CG14435	1.61019e-10	0.516412	0.273	0.181	1.92079e-06	1
RpS3A	1.96952e-10	-0.444531	0.5	0.605	2.34944e-06	1
RpL5	2.13738e-10	-0.386517	0.527	0.631	2.54968e-06	1
Hmgs	2.14052e-10	0.526677	0.296	0.207	2.55342e-06	1
CG10680	2.82161e-10	0.389704	0.479	0.387	3.3659e-06	1
Dr	2.9294e-10	-0.435687	0.166	0.273	3.49448e-06	1
RpS28b	3.40593e-10	-0.424854	0.422	0.533	4.06294e-06	1
Ssdp	3.57881e-10	0.502415	0.282	0.192	4.26916e-06	1
Usp10	3.58809e-10	-0.4426	0.306	0.418	4.28024e-06	1
Eip63E	3.64554e-10	0.489448	0.667	0.623	4.34877e-06	1
conu	3.68367e-10	0.351077	0.566	0.474	4.39425e-06	1
hfp	3.84111e-10	0.470782	0.363	0.272	4.58205e-06	1
Ank	4.47286e-10	0.387684	0.547	0.463	5.33567e-06	1
dally	4.52343e-10	0.569083	0.328	0.239	5.396e-06	1
RpL37A	4.54304e-10	-0.411545	0.408	0.526	5.41939e-06	1
CaMKII	5.52702e-10	0.505774	0.375	0.287	6.59318e-06	1
PRAS40	5.54779e-10	-0.479002	0.214	0.326	6.61796e-06	1
Mef2	5.55587e-10	0.380363	0.605	0.514	6.6276e-06	1
RpL15	5.63166e-10	-0.407385	0.582	0.68	6.71801e-06	1
unc-13	5.98347e-10	0.470697	0.515	0.432	7.13768e-06	1
Thd1	6.38525e-10	0.38728	0.513	0.426	7.61696e-06	1
Nipped-A	6.69899e-10	0.460844	0.348	0.256	7.99122e-06	1
Thor	6.78239e-10	0.336864	0.585	0.513	8.09071e-06	1
fon	8.05654e-10	0.424126	0.381	0.279	9.61065e-06	1
kuz	8.53104e-10	-0.495677	0.235	0.34	1.01767e-05	1
14-3-3zeta	8.6975e-10	-0.323514	0.502	0.605	1.03753e-05	1
Mical	8.94084e-10	0.566686	0.369	0.277	1.06655e-05	1
Gprk1	9.12132e-10	0.468753	0.405	0.318	1.08808e-05	1
RhoGAPp190	9.31456e-10	0.477456	0.271	0.185	1.11113e-05	1
RpL29	9.49223e-10	-0.435859	0.352	0.463	1.13233e-05	1
CG4538	9.77965e-10	-0.416281	0.216	0.323	1.16661e-05	1
luna	9.83207e-10	0.276423	0.769	0.695	1.17287e-05	1
CG2852	1.02221e-09	-0.459369	0.199	0.297	1.21939e-05	1
Eaat1	1.08435e-09	-0.548625	0.267	0.369	1.29352e-05	1
Got2	1.09672e-09	-0.334587	0.469	0.589	1.30828e-05	1
RpL35	1.37272e-09	-0.409101	0.47	0.579	1.63752e-05	1
CG13784	1.39386e-09	0.435482	0.674	0.59	1.66274e-05	1
Tet	1.7142e-09	-0.486449	0.5	0.598	2.04487e-05	1
RpL24	1.79678e-09	-0.365633	0.535	0.64	2.14338e-05	1
spri	2.0414e-09	0.362909	0.682	0.616	2.43519e-05	1
alpha-Spec	2.27453e-09	-0.416995	0.176	0.273	2.71329e-05	1
Mct1	2.35678e-09	0.423109	0.274	0.187	2.8114e-05	1
CG33229	2.63319e-09	-0.347602	0.621	0.712	3.14113e-05	1
aqz	2.81823e-09	-0.326378	0.935	0.954	3.36186e-05	1
SNF4Agamma	2.85003e-09	-0.254474	0.866	0.904	3.3998e-05	1
CG3597	3.13671e-09	0.491536	0.303	0.216	3.74178e-05	1
E(bx)	3.2824e-09	0.487337	0.323	0.241	3.91557e-05	1
RpS4	4.73566e-09	-0.387589	0.513	0.607	5.64917e-05	1
Saf-B	5.4187e-09	0.427567	0.273	0.189	6.46396e-05	1
CG34376	5.58436e-09	0.464967	0.566	0.491	6.66158e-05	1
CG1468	5.66289e-09	0.340755	0.413	0.314	6.75526e-05	1
CG3164	5.7345e-09	0.359453	0.569	0.495	6.84068e-05	1
Sik3	6.08657e-09	0.394701	0.554	0.476	7.26066e-05	1
RpS20	8.4858e-09	-0.36493	0.502	0.598	0.000101227	1
RpL30	8.9273e-09	-0.39087	0.219	0.32	0.000106494	1
Mur2B	9.12976e-09	0.286564	0.508	0.4	0.000108909	1
RpL12	9.14762e-09	-0.357574	0.532	0.626	0.000109122	1
cathD	9.21415e-09	-0.439816	0.219	0.31	0.000109916	1
Wdr62	9.73709e-09	-0.500961	0.559	0.65	0.000116154	1
CG6701	9.85387e-09	-0.488764	0.202	0.298	0.000117547	1
CG8671	1.08168e-08	-0.364904	0.24	0.345	0.000129034	1
CG6966	1.10869e-08	-0.46946	0.382	0.481	0.000132255	1
RpL27A	1.23156e-08	-0.410594	0.674	0.75	0.000146913	1
cta	1.25683e-08	-0.380044	0.38	0.485	0.000149927	1
sesB	1.78492e-08	0.358562	0.541	0.467	0.000212923	1
Irp-1B	1.93055e-08	-0.309897	0.211	0.315	0.000230295	1
RpL19	2.17221e-08	-0.303802	0.618	0.716	0.000259123	1
Ttd14	2.35952e-08	0.465463	0.333	0.255	0.000281468	1
ftz-f1	2.5502e-08	0.296012	0.664	0.591	0.000304213	1
santa-maria	2.717e-08	0.444755	0.319	0.234	0.000324111	1
Hn	2.90586e-08	-0.384672	0.333	0.435	0.00034664	1
Rala	3.24034e-08	-0.387167	0.428	0.523	0.00038654	1
Doa	3.32799e-08	0.31994	0.571	0.496	0.000396996	1
RpL35A	3.36832e-08	-0.333642	0.491	0.587	0.000401807	1
Cirl	3.43627e-08	-0.415292	0.303	0.4	0.000409913	1
Dad	3.71562e-08	-0.438204	0.41	0.5	0.000443236	1
Ac13E	3.99752e-08	0.376153	0.319	0.232	0.000476864	1
Bx	4.11309e-08	0.565487	0.251	0.176	0.000490651	1
CG17508	5.09319e-08	0.402335	0.36	0.283	0.000607566	1
Fit1	5.23519e-08	-0.43534	0.17	0.258	0.000624506	1
CG9005	5.3839e-08	0.361914	0.425	0.343	0.000642246	1
RpL4	6.23923e-08	-0.346163	0.487	0.577	0.000744278	1
Smox	6.74545e-08	0.399626	0.263	0.186	0.000804665	1
ltl	7.37574e-08	-0.446837	0.167	0.251	0.000879852	1
svp	7.53426e-08	0.329438	0.582	0.501	0.000898761	1
JIL-1	8.12505e-08	0.426792	0.28	0.204	0.000969238	1
RpL41	8.31871e-08	-0.394388	0.528	0.611	0.000992338	1
Akt1	8.60457e-08	-0.332293	0.307	0.411	0.00102644	1
Atf6	8.87643e-08	-0.355824	0.539	0.623	0.00105887	1
CrebB	9.77418e-08	-0.427827	0.199	0.289	0.00116596	1
Myd88	1.12882e-07	-0.39477	0.298	0.395	0.00134657	1
Pka-R2	1.16279e-07	0.388333	0.352	0.268	0.00138709	1
RpS23	1.25415e-07	-0.400553	0.625	0.703	0.00149607	1
krz	1.53714e-07	-0.349274	0.17	0.252	0.00183366	1
Nuak1	1.68574e-07	-0.387517	0.222	0.309	0.00201092	1
Trpm	1.82731e-07	0.297751	0.39	0.304	0.0021798	1
aop	1.90562e-07	-0.27391	0.521	0.627	0.00227322	1
Ip259	1.97118e-07	-0.345534	0.183	0.267	0.00235141	1
nuf	2.16458e-07	-0.332614	0.487	0.578	0.00258213	1
CG2765	2.5316e-07	0.362551	0.294	0.214	0.00301994	1
CG3376	2.64476e-07	0.347868	0.611	0.557	0.00315493	1
mrva	2.71968e-07	-0.434395	0.242	0.327	0.00324431	1
B4	2.82611e-07	-0.269033	0.418	0.517	0.00337127	1
RpL11	3.22471e-07	-0.330937	0.447	0.544	0.00384676	1
CG32687	3.29058e-07	0.347894	0.541	0.465	0.00392534	1
Vha13	3.62268e-07	-0.488465	0.191	0.267	0.0043215	1
kmr	3.89137e-07	-0.457796	0.184	0.264	0.00464202	1
Nacalpha	4.20376e-07	-0.375797	0.3	0.387	0.00501466	1
Cys	4.30047e-07	-0.464007	0.244	0.321	0.00513003	1
B52	4.37038e-07	0.381227	0.362	0.296	0.00521342	1
eEF1beta	4.46735e-07	-0.330491	0.313	0.408	0.0053291	1
RpL40	4.65463e-07	-0.316427	0.408	0.497	0.0055525	1
NKAIN	4.66602e-07	-0.35261	0.25	0.34	0.00556609	1
Nap1	4.67778e-07	-0.328702	0.2	0.283	0.00558012	1
Pzl	4.84218e-07	0.454105	0.308	0.238	0.00577623	1
Cbs	5.01667e-07	0.447444	0.308	0.234	0.00598438	1
Dys	5.3243e-07	0.268247	0.616	0.541	0.00635135	1
RpS7	5.56681e-07	-0.311719	0.624	0.707	0.00664065	1
RhoGAP19D	5.71009e-07	0.342834	0.525	0.46	0.00681157	1
RpL13A	7.29526e-07	-0.342477	0.602	0.672	0.00870252	1
CG17574	7.77097e-07	-0.458638	0.198	0.273	0.00926999	1
Pde11	8.11197e-07	0.301932	0.62	0.575	0.00967677	1
Lst	8.55221e-07	-0.386302	0.767	0.806	0.0102019	1
BomS6	8.68637e-07	0.374811	0.259	0.188	0.010362	1
mub	1.19024e-06	0.417982	0.268	0.203	0.0141984	1
wnd	1.24991e-06	-0.359594	0.272	0.361	0.0149102	1
RpS29	1.27217e-06	-0.380023	0.517	0.602	0.0151757	1
CG1677	1.38998e-06	0.368136	0.336	0.265	0.0165811	1
Eno	1.47939e-06	-0.352431	0.446	0.525	0.0176476	1
Mbs	1.65567e-06	-0.341051	0.272	0.358	0.0197505	1
Ref1	1.68528e-06	-0.283569	0.202	0.288	0.0201037	1
akirin	1.77506e-06	-0.29107	0.261	0.35	0.0211747	1
His3.3B	2.03935e-06	0.30063	0.443	0.373	0.0243274	1
Zyx	2.07055e-06	0.397624	0.265	0.199	0.0246996	1
RapGAP1	2.0783e-06	0.427795	0.299	0.231	0.0247921	1
mim	2.3732e-06	0.324846	0.437	0.363	0.0283099	1
dnr1	2.4166e-06	-0.312296	0.193	0.272	0.0288276	1
Unr	2.54299e-06	-0.350352	0.714	0.744	0.0303354	1
tweek	2.7607e-06	-0.313494	0.281	0.365	0.0329324	1
RpS24	3.00547e-06	-0.352494	0.341	0.43	0.0358523	1
RpS8	3.09084e-06	-0.28684	0.664	0.737	0.0368706	1
hep	3.33151e-06	-0.342579	0.265	0.344	0.0397415	1
RpL36A	3.69079e-06	-0.334619	0.521	0.598	0.0440275	1
dlg1	3.82916e-06	0.326066	0.441	0.379	0.045678	1
RpL8	3.97655e-06	-0.254392	0.618	0.692	0.0474363	1
Trf4-1	3.98953e-06	0.396803	0.263	0.201	0.0475912	1
Cdep	3.9953e-06	0.386834	0.409	0.345	0.04766	1
Mrtf	4.72075e-06	-0.357062	0.224	0.303	0.0563138	1
RpS27A	4.81816e-06	-0.346054	0.609	0.677	0.0574758	1
Tango5	4.88842e-06	-0.308524	0.3	0.384	0.058314	1
alc	5.38299e-06	0.3078	0.272	0.207	0.0642137	1
CkIIbeta	5.43092e-06	0.368612	0.342	0.277	0.0647854	1
eIF4G2	5.78459e-06	0.311669	0.38	0.311	0.0690044	1
RpL26	6.53974e-06	-0.250233	0.547	0.637	0.0780125	1
COX4	6.63979e-06	0.291749	0.351	0.279	0.0792061	1
sfl	6.99768e-06	-0.262038	0.458	0.541	0.0834754	1
Vha26	7.20325e-06	-0.307788	0.211	0.286	0.0859276	1
ABCD	9.14962e-06	0.336043	0.26	0.2	0.109146	1
p120ctn	1.02238e-05	0.325652	0.396	0.334	0.12196	1
Opa1	1.19326e-05	-0.253274	0.188	0.262	0.142344	1
gpp	1.20345e-05	0.278816	0.649	0.603	0.14356	1
Mlc-c	1.53993e-05	-0.308803	0.287	0.364	0.183698	1
Mdh1	1.6247e-05	0.30821	0.42	0.351	0.19381	1
pnt	1.64518e-05	-0.373187	0.236	0.308	0.196254	1
Rim2	1.6538e-05	0.315253	0.29	0.226	0.197282	1
glob1	1.80347e-05	-0.277073	0.699	0.762	0.215136	1
E(Pc)	1.80449e-05	-0.270601	0.216	0.291	0.215258	1
bol	1.91068e-05	0.449307	0.303	0.245	0.227925	1
CG11360	2.08379e-05	0.330865	0.258	0.198	0.248575	1
Synd	2.34438e-05	-0.250627	0.224	0.3	0.279661	1
Spat	2.49265e-05	-0.549861	0.425	0.482	0.297348	1
HDAC4	2.49392e-05	-0.307915	0.299	0.376	0.297499	1
Stlk	2.50112e-05	0.330595	0.335	0.275	0.298359	1
Tomosyn	2.50655e-05	-0.317255	0.312	0.386	0.299006	1
RpL7A	2.50893e-05	-0.333544	0.583	0.643	0.29929	1
galectin	2.56214e-05	0.306076	0.306	0.247	0.305638	1
Gmap	2.65153e-05	0.290695	0.51	0.461	0.316301	1
vsg	2.67255e-05	-0.298403	0.25	0.321	0.318808	1
CG32850	2.69234e-05	0.551602	0.26	0.205	0.32117	1
Gbeta13F	2.73401e-05	0.342479	0.556	0.518	0.32614	1
Rox8	2.83324e-05	0.294324	0.323	0.262	0.337977	1
fog	3.21232e-05	0.344475	0.268	0.21	0.383198	1
CG34347	3.37656e-05	-0.446513	0.329	0.402	0.40279	1
CG30197	3.4366e-05	0.273796	0.255	0.195	0.409951	1
Chc	3.86324e-05	-0.273366	0.254	0.327	0.460846	1
RpS9	3.88727e-05	-0.263242	0.545	0.615	0.463712	1
Rm62	4.68779e-05	0.253161	0.727	0.702	0.559206	1
Nak	4.90844e-05	-0.26666	0.183	0.253	0.585528	1
Pgm1	5.52047e-05	0.328054	0.292	0.236	0.658536	1
RpL10Ab	5.71746e-05	-0.256777	0.54	0.611	0.682035	1
Top1	5.72581e-05	0.293671	0.366	0.307	0.683032	1
CG2865	6.09506e-05	-0.379156	0.285	0.357	0.727079	1
CG6700	6.10159e-05	0.291782	0.446	0.399	0.727859	1
CG42674	7.13759e-05	0.278187	0.439	0.38	0.851444	1
RpS17	7.35353e-05	-0.250766	0.491	0.564	0.877203	1
RpL18	7.97355e-05	-0.267643	0.502	0.569	0.951165	1
Mal-B2	9.35725e-05	-0.320729	0.48	0.547	1	1
eEF1gamma	0.000113836	-0.260645	0.272	0.342	1	1
C3G	0.000120025	0.323054	0.267	0.214	1	1
RpS6	0.000127983	-0.267743	0.449	0.513	1	1
CASK	0.000130045	0.309251	0.364	0.312	1	1
CG8108	0.000140251	-0.286918	0.336	0.407	1	1
CG5381	0.000145172	0.380597	0.277	0.23	1	1
sm	0.000146679	0.328979	0.338	0.286	1	1
Lamp1	0.000151957	0.299128	0.402	0.35	1	1
UbcE2H	0.000176781	0.271672	0.393	0.34	1	1
alphaTub84B	0.000190798	-0.288956	0.308	0.377	1	1
S	0.000209045	-0.336288	0.214	0.274	1	1
Pgant5	0.000220332	0.289089	0.303	0.25	1	1
app	0.000222643	-0.268738	0.342	0.413	1	1
gus	0.000228234	0.30904	0.263	0.214	1	1
CG12567	0.000252242	0.299837	0.338	0.282	1	1
arr	0.000269868	0.366339	0.349	0.303	1	1
Pax	0.000325281	0.287779	0.254	0.204	1	1
flfl	0.000433369	0.260451	0.333	0.283	1	1
RpS15Aa	0.00049827	-0.256455	0.446	0.508	1	1
Taldo	0.000544999	0.417757	0.33	0.286	1	1
Sarm	0.000624775	-0.336783	0.539	0.589	1	1
Mad	0.000653588	-0.257749	0.285	0.349	1	1
ATPsynF	0.000735972	0.282184	0.285	0.235	1	1
His4r	0.00078145	-0.2741	0.223	0.277	1	1
east	0.00086783	0.312949	0.269	0.223	1	1
Gdi	0.000877062	-0.2522	0.276	0.335	1	1
Cp1	0.000954897	0.43448	0.768	0.785	1	1
crp	0.000955505	0.306015	0.355	0.312	1	1
RpL36	0.00138081	-0.280443	0.571	0.625	1	1
AP-1gamma	0.00165424	-0.265552	0.234	0.287	1	1
Pkc98E	0.0024467	0.273536	0.391	0.354	1	1
smg	0.00403481	0.27583	0.325	0.285	1	1
Naprt	0.00595644	-0.321446	0.334	0.379	1	1
Xe7	0.00931043	0.30964	0.325	0.299	1	1
GstD1.1	4.15617e-201	1.88212	0.956	0.552	4.9579e-197	2
CG11089.1	1.09887e-199	1.79489	0.962	0.56	1.31084e-195	2
CG12795.1	1.60098e-188	2.10593	0.749	0.216	1.90981e-184	2
GstE1.1	4.31674e-167	2.01561	0.753	0.251	5.14944e-163	2
FASN1.1	9.37272e-165	-2.92961	0.569	0.866	1.11807e-160	2
ref(2)P.1	1.45005e-155	1.42683	0.937	0.536	1.72977e-151	2
Hsp26.1	2.40597e-155	2.3179	0.778	0.302	2.87008e-151	2
Tsp42Ed.1	2.27962e-153	1.67376	0.793	0.318	2.71936e-149	2
apolpp.1	2.96303e-148	-2.50386	0.553	0.887	3.5346e-144	2
ACC.1	1.68107e-145	-2.36077	0.414	0.801	2.00535e-141	2
Pfas.1	3.95747e-144	1.58785	0.874	0.463	4.72087e-140	2
Gbs-70E.1	7.58527e-141	-3.8964	0.16	0.653	9.04847e-137	2
Ubi-p63E.1	6.9546e-140	1.46455	0.89	0.52	8.29614e-136	2
CG10383.1	1.03174e-139	1.76585	0.805	0.36	1.23076e-135	2
stv.1	1.84268e-138	1.4132	0.914	0.52	2.19813e-134	2
bru1.1	7.1513e-135	-1.66537	0.569	0.877	8.53079e-131	2
CG7130.1	8.23188e-134	1.86734	0.598	0.162	9.81981e-130	2
Nplp2.1	4.18278e-133	-2.57926	0.354	0.773	4.98964e-129	2
AnxB9.1	1.95553e-131	1.27829	0.846	0.379	2.33276e-127	2
CG9674.1	2.1912e-131	1.24914	0.924	0.536	2.61389e-127	2
Chchd2.1	1.89001e-129	1.46735	0.883	0.529	2.2546e-125	2
Syp.1	3.25641e-129	-1.64252	0.603	0.885	3.88458e-125	2
InR.1	2.44919e-127	1.12325	0.99	0.887	2.92164e-123	2
GIIIspla2.1	1.6736e-120	1.71121	0.723	0.315	1.99644e-116	2
CG7470.1	5.89344e-120	-1.88421	0.489	0.807	7.03029e-116	2
raw.1	2.16191e-117	1.23464	0.905	0.544	2.57894e-113	2
Act5C.1	1.84708e-112	1.34871	0.834	0.45	2.20338e-108	2
CG14207.1	1.62184e-111	1.31425	0.864	0.494	1.93469e-107	2
CG16898.1	1.80592e-110	1.47697	0.745	0.334	2.15428e-106	2
lola.1	9.77734e-109	-1.26695	0.694	0.92	1.16634e-104	2
vir-1.1	6.57796e-107	1.12592	0.944	0.67	7.84685e-103	2
CG32521.1	1.87363e-106	-1.70725	0.565	0.838	2.23506e-102	2
CG6503.1	1.92321e-106	-1.84436	0.621	0.86	2.2942e-102	2
Frl.1	5.78781e-105	1.34431	0.799	0.418	6.90428e-101	2
Egfr.1	8.13494e-105	-1.55766	0.574	0.841	9.70417e-101	2
Hsc70-4.1	1.79307e-104	1.1346	0.905	0.685	2.13896e-100	2
Hsp27.1	1.43621e-103	1.9214	0.635	0.243	1.71325e-99	2
CenG1A.1	4.51292e-100	1.57052	0.797	0.464	5.38346e-96	2
mtd.1	1.2206e-98	-1.82121	0.445	0.773	1.45606e-94	2
mamo.1	3.92385e-98	-1.91035	0.259	0.655	4.68076e-94	2
Atg1.1	1.63974e-95	1.67374	0.741	0.425	1.95605e-91	2
CG42588.1	9.39603e-95	1.354	0.603	0.223	1.12085e-90	2
puc.1	6.00096e-94	1.03304	0.918	0.619	7.15854e-90	2
AdSS.1	1.67945e-91	1.30066	0.693	0.323	2.00342e-87	2
CG5953.1	3.15519e-91	1.14827	0.891	0.609	3.76383e-87	2
Nc73EF.1	3.60436e-91	-1.58539	0.404	0.736	4.29964e-87	2
Sox102F.1	5.74379e-91	-1.28463	0.514	0.826	6.85176e-87	2
Snoo.1	2.96485e-90	-1.20094	0.681	0.893	3.53677e-86	2
oys.1	4.34777e-90	1.27489	0.618	0.237	5.18645e-86	2
IP3K1.1	2.75761e-89	1.2026	0.822	0.471	3.28956e-85	2
Nmdmc.1	8.48575e-89	0.928115	0.915	0.553	1.01227e-84	2
Gart.1	2.52203e-85	1.11192	0.869	0.598	3.00853e-81	2
Prosalpha3.1	4.0502e-85	1.50482	0.514	0.186	4.83149e-81	2
CG5958.1	5.50025e-85	1.45508	0.666	0.328	6.56124e-81	2
Hsp68.1	3.87015e-84	1.97869	0.548	0.216	4.6167e-80	2
CG14823.1	4.1107e-84	-2.26716	0.062	0.44	4.90365e-80	2
CG45050.1	9.98719e-84	0.906279	0.966	0.881	1.19137e-79	2
CG17108.1	1.3044e-83	-2.37784	0.112	0.497	1.55602e-79	2
Trxr-1.1	8.04231e-83	1.13034	0.668	0.299	9.59367e-79	2
Acsl.1	9.49679e-83	-1.81512	0.293	0.644	1.13287e-78	2
Smr.1	4.57776e-82	-1.20406	0.529	0.822	5.4608e-78	2
Hsp83.1	6.71466e-82	1.02271	0.891	0.682	8.00992e-78	2
Atg8a.1	1.54239e-81	1.04403	0.86	0.638	1.83991e-77	2
pcs.1	1.77814e-81	1.34616	0.681	0.338	2.12115e-77	2
eIF2beta.1	2.29591e-81	1.0548	0.794	0.439	2.7388e-77	2
Abl.1	4.81834e-81	1.18728	0.646	0.281	5.7478e-77	2
CG7720.1	6.15762e-81	-2.9335	0.082	0.447	7.34542e-77	2
Atg18b.1	1.5319e-79	1.20649	0.698	0.359	1.8274e-75	2
AspRS.1	3.98579e-79	1.33698	0.466	0.148	4.75465e-75	2
dnc.1	1.15111e-76	-1.29521	0.567	0.814	1.37316e-72	2
Sem1.1	3.04201e-76	1.38033	0.437	0.143	3.62881e-72	2
CG17841.1	3.21641e-76	-1.68647	0.211	0.565	3.83685e-72	2
CG34166.1	3.64255e-76	-2.33714	0.668	0.847	4.3452e-72	2
dsx.1	3.67596e-76	-1.76971	0.277	0.617	4.38505e-72	2
CG42524.1	5.22743e-76	-1.96323	0.213	0.557	6.2358e-72	2
CG8086.1	4.67756e-75	1.44544	0.571	0.242	5.57987e-71	2
Hsc70Cb.1	1.45611e-74	1.07477	0.773	0.446	1.737e-70	2
Culd.1	1.77228e-74	-2.04794	0.084	0.431	2.11415e-70	2
BomT3.1	7.36825e-74	-2.29221	0.162	0.515	8.78958e-70	2
CG6870.1	9.68914e-74	1.62125	0.419	0.133	1.15582e-69	2
PhKgamma.1	7.00417e-73	-1.41777	0.364	0.685	8.35528e-69	2
Src64B.1	7.17444e-73	1.32638	0.739	0.467	8.55839e-69	2
Xrp1.1	9.19831e-73	0.651797	0.986	0.886	1.09727e-68	2
kay.1	1.86501e-72	0.917475	0.769	0.434	2.22478e-68	2
Eglp4.1	2.20376e-72	-2.20804	0.112	0.456	2.62887e-68	2
Rpn2.1	4.3016e-72	1.22533	0.543	0.228	5.13138e-68	2
rhea.1	8.17101e-72	1.03284	0.732	0.414	9.74719e-68	2
trbl.1	1.25766e-71	1.00835	0.758	0.431	1.50026e-67	2
Prosalpha2.1	1.52884e-71	1.26875	0.447	0.155	1.82376e-67	2
AkhR.1	3.56093e-71	-1.896	0.062	0.405	4.24783e-67	2
CG1213.1	5.19778e-71	-2.21464	0.089	0.425	6.20044e-67	2
PCB.1	6.10061e-71	-1.47485	0.393	0.685	7.27742e-67	2
GEFmeso.1	9.42287e-71	1.04899	0.695	0.353	1.12405e-66	2
mbf1.1	2.97675e-70	1.07834	0.603	0.266	3.55097e-66	2
Prosbeta4.1	3.725e-70	1.36102	0.461	0.17	4.44355e-66	2
CG41378.1	1.73863e-69	-1.47398	0.299	0.626	2.07401e-65	2
CG44325.1	1.97811e-69	1.15465	0.556	0.238	2.35969e-65	2
Pka-C1.1	5.91686e-69	0.954941	0.853	0.605	7.05823e-65	2
CG32647.1	2.79409e-68	-1.89374	0.343	0.638	3.33307e-64	2
Pvr.1	2.98932e-68	1.31898	0.675	0.357	3.56597e-64	2
CG1673.1	3.54172e-68	0.98593	0.802	0.514	4.22492e-64	2
UGP.1	3.54723e-68	-1.87098	0.168	0.507	4.23149e-64	2
CG42788.1	5.8634e-68	-2.48053	0.241	0.562	6.99445e-64	2
Prosbeta7.1	6.44333e-68	1.19631	0.468	0.177	7.68625e-64	2
Irc.1	9.30265e-68	1.05647	0.735	0.442	1.10971e-63	2
AcCoAS.1	9.46375e-68	-1.48774	0.499	0.746	1.12893e-63	2
Rpn10.1	1.23238e-67	1.27964	0.466	0.177	1.47011e-63	2
px.1	1.2521e-67	-1.24189	0.553	0.791	1.49363e-63	2
sug.1	9.82741e-67	-2.60646	0.081	0.406	1.17231e-62	2
CG15096.1	3.22423e-66	-1.9995	0.023	0.329	3.84619e-62	2
IM4.1	1.40654e-65	-2.33827	0.067	0.387	1.67786e-61	2
GstE8.1	3.41831e-65	1.44408	0.404	0.135	4.07771e-61	2
baf.1	4.95178e-65	1.24813	0.412	0.136	5.90698e-61	2
Smg5.1	6.3906e-65	1.05902	0.704	0.412	7.62335e-61	2
Pde9.1	9.23896e-65	-1.2323	0.582	0.799	1.10212e-60	2
CaMKI.1	1.01506e-64	-0.723872	0.93	0.972	1.21086e-60	2
Vps13.1	1.6907e-64	1.17702	0.595	0.285	2.01683e-60	2
Rad23.1	4.46256e-64	1.06539	0.56	0.257	5.32339e-60	2
CG9932.1	6.66568e-64	-0.792679	0.885	0.97	7.95148e-60	2
CG7766.1	8.79389e-64	-1.36065	0.362	0.644	1.04902e-59	2
chic.1	1.18497e-63	1.04581	0.648	0.341	1.41355e-59	2
CG1578.1	1.93845e-63	-1.76413	0.141	0.462	2.31238e-59	2
AdipoR.1	2.3078e-63	-1.41593	0.303	0.616	2.75297e-59	2
Ist1.1	3.3464e-63	1.15201	0.515	0.223	3.99193e-59	2
Gclm.1	3.54381e-63	1.35118	0.584	0.287	4.22742e-59	2
Rpn6.1	4.54989e-63	1.07996	0.614	0.314	5.42757e-59	2
AdSL.1	1.53084e-62	1.29446	0.424	0.155	1.82614e-58	2
aay.1	1.03722e-61	1.18141	0.751	0.498	1.2373e-57	2
NFAT.1	1.86584e-60	-1.16589	0.532	0.765	2.22576e-56	2
bun.1	1.91434e-60	-1.47755	0.744	0.877	2.28361e-56	2
Idh.1	4.06754e-60	-1.72539	0.19	0.495	4.85217e-56	2
Tret1-1.1	5.73676e-60	-1.44318	0.34	0.636	6.84338e-56	2
Tpr2.1	8.5401e-60	0.967381	0.791	0.533	1.01875e-55	2
if.1	1.34489e-59	-2.04639	0.118	0.425	1.60432e-55	2
TER94.1	1.37767e-59	0.918944	0.709	0.42	1.64343e-55	2
CCHa2.1	3.24357e-59	-2.06015	0.046	0.334	3.86925e-55	2
Msp300.1	7.45857e-59	-0.861689	0.782	0.915	8.89732e-55	2
Nmda1.1	1.16539e-58	1.07612	0.57	0.279	1.39019e-54	2
Prosbeta5.1	1.94421e-58	1.24149	0.409	0.152	2.31924e-54	2
MFS17.1	7.25976e-58	-1.07576	0.503	0.76	8.66016e-54	2
CG42240	7.52967e-58	1.37925	0.339	0.105	8.98214e-54	2
Men.1	1.21841e-57	-1.60146	0.496	0.731	1.45344e-53	2
spoon.1	1.67002e-57	-1.48467	0.204	0.506	1.99216e-53	2
Jra	1.72519e-57	1.20959	0.34	0.103	2.05798e-53	2
drpr.1	3.16296e-57	0.984508	0.68	0.382	3.77309e-53	2
CG8034.1	7.12934e-57	-1.60797	0.421	0.666	8.50458e-53	2
l(1)G0196.1	1.12355e-56	-1.34947	0.202	0.511	1.34028e-52	2
Invadolysin.1	1.48512e-56	-2.4114	0.06	0.344	1.7716e-52	2
Cyt-b5-r.1	9.75623e-56	-1.21275	0.344	0.638	1.16382e-51	2
CG13315.1	2.74413e-55	-1.42902	0.707	0.86	3.27347e-51	2
Tlk.1	4.80441e-55	-1.14417	0.345	0.638	5.73118e-51	2
drongo.1	1.39936e-54	1.13627	0.754	0.522	1.6693e-50	2
CG5966.1	1.76133e-54	1.0259	0.671	0.378	2.10109e-50	2
sra.1	3.20666e-54	1.16236	0.471	0.203	3.82522e-50	2
Pdfr.1	3.86019e-54	-1.39139	0.26	0.55	4.60482e-50	2
SCaMC.1	4.13475e-54	0.787931	0.886	0.725	4.93234e-50	2
Desat1.1	4.48432e-54	-0.886973	0.843	0.909	5.34935e-50	2
Gpdh1.1	6.68472e-54	-1.95312	0.152	0.433	7.9742e-50	2
DnaJ-1.1	7.80986e-54	1.04159	0.717	0.473	9.31638e-50	2
AttB.1	1.05446e-53	1.25672	0.378	0.131	1.25786e-49	2
kdn.1	3.10608e-53	-1.89259	0.089	0.368	3.70524e-49	2
Hsp70Bc.1	3.53343e-53	1.49768	0.354	0.121	4.21503e-49	2
Rpn5.1	2.14261e-52	1.05373	0.466	0.198	2.55592e-48	2
ps.1	2.29497e-52	-0.642592	0.961	0.992	2.73768e-48	2
Spn88Eb.1	9.26556e-52	1.13747	0.381	0.142	1.10529e-47	2
cv-c.1	2.22046e-51	0.781572	0.844	0.586	2.64879e-47	2
Stat92E.1	5.43285e-51	-1.53004	0.4	0.653	6.48084e-47	2
Chmp1.1	7.63069e-51	1.22783	0.401	0.161	9.10265e-47	2
lilli.1	1.04368e-50	-0.926425	0.577	0.782	1.24501e-46	2
kek5.1	1.83527e-50	-1.10044	0.396	0.67	2.18929e-46	2
sima.1	1.98004e-50	-0.70981	0.862	0.949	2.36199e-46	2
loco.1	2.91292e-50	0.850123	0.486	0.204	3.47482e-46	2
Chd64.1	3.24989e-50	0.876434	0.67	0.384	3.8768e-46	2
Hsp23	3.9578e-50	1.18042	0.293	0.081	4.72125e-46	2
Rpn1.1	4.01326e-50	1.11746	0.419	0.174	4.78742e-46	2
sbb.1	9.52848e-50	-1.1747	0.402	0.651	1.13665e-45	2
Xbp1.1	9.88099e-50	0.869927	0.747	0.516	1.1787e-45	2
Gdap2.1	1.51777e-49	1.03518	0.602	0.342	1.81055e-45	2
Rpn8.1	3.27553e-49	1.02076	0.359	0.13	3.90738e-45	2
Idgf1.1	1.09767e-48	1.03784	0.477	0.22	1.30941e-44	2
CG3638.1	1.13933e-48	-1.23077	0.272	0.546	1.3591e-44	2
PSMG1	1.17835e-48	1.08125	0.265	0.074	1.40565e-44	2
Prosalpha5.1	2.11531e-48	1.1095	0.359	0.135	2.52336e-44	2
CG8312.1	7.19658e-48	0.869398	0.541	0.255	8.5848e-44	2
Atpalpha	8.53005e-48	-1.00547	0.58	0.789	1.01755e-43	2
CCT3.1	9.53999e-48	0.974019	0.431	0.178	1.13803e-43	2
l(3)80Fg.1	1.03459e-47	-1.06624	0.423	0.674	1.23416e-43	2
maf-S.1	1.88831e-47	1.17037	0.372	0.145	2.25257e-43	2
Prosalpha6.1	4.47535e-47	1.11693	0.398	0.168	5.33864e-43	2
CG6428.1	7.33221e-47	1.05362	0.458	0.21	8.7466e-43	2
CG31704.1	8.83726e-47	1.21465	0.392	0.164	1.0542e-42	2
Hsp60A.1	9.50525e-47	0.988874	0.424	0.181	1.13388e-42	2
jvl.1	9.87418e-47	0.826921	0.855	0.714	1.17789e-42	2
CG5151.1	1.63407e-46	-1.63793	0.509	0.701	1.94928e-42	2
pum.1	2.8479e-46	-1.28558	0.343	0.603	3.39726e-42	2
Fer1HCH.1	2.99673e-46	0.598566	0.918	0.764	3.5748e-42	2
Rpt5.1	4.37749e-46	1.04796	0.385	0.155	5.2219e-42	2
DppIII.1	4.94874e-46	1.07804	0.359	0.139	5.90336e-42	2
Hers.1	7.37291e-46	0.780669	0.793	0.566	8.79514e-42	2
Rpn9.1	8.66582e-46	1.06207	0.346	0.129	1.03375e-41	2
Ork1.1	8.9061e-46	-1.58794	0.141	0.403	1.06241e-41	2
CG8679.1	1.31148e-45	1.08459	0.368	0.143	1.56446e-41	2
nkd.1	1.67251e-45	1.18655	0.629	0.387	1.99514e-41	2
Rpn11	1.75418e-45	1.05175	0.339	0.123	2.09256e-41	2
bmm.1	1.86112e-45	0.60611	0.91	0.713	2.22013e-41	2
Rpn13.1	2.31493e-45	0.96877	0.457	0.214	2.76147e-41	2
CG1416.1	3.56048e-45	1.06979	0.345	0.13	4.2473e-41	2
Lsd-2.1	4.38708e-45	-0.869066	0.695	0.859	5.23335e-41	2
pyd.1	6.0763e-45	-1.18533	0.378	0.631	7.24842e-41	2
Rpn3.1	1.4382e-44	1.01495	0.369	0.148	1.71563e-40	2
Myo31DF.1	1.79699e-44	1.03978	0.414	0.168	2.14363e-40	2
Tsf1.1	8.99551e-44	-1.61648	0.105	0.357	1.07307e-39	2
CG33969	1.12877e-43	1.18189	0.292	0.096	1.34651e-39	2
Mob2.1	1.6014e-43	0.683366	0.864	0.715	1.91031e-39	2
cic.1	1.67759e-43	-1.11855	0.506	0.717	2.0012e-39	2
Rpt3.1	1.70016e-43	0.997009	0.372	0.149	2.02812e-39	2
CG10527.1	1.93681e-43	0.930156	0.39	0.161	2.31042e-39	2
CG3036.1	2.31852e-43	0.410781	0.869	0.578	2.76576e-39	2
shep.1	3.91666e-43	-0.862544	0.603	0.797	4.67219e-39	2
CG5955.1	7.26576e-43	1.00351	0.371	0.147	8.66733e-39	2
Gpo1.1	1.59321e-42	-1.72398	0.096	0.34	1.90054e-38	2
PKD.1	1.88885e-42	-1.58576	0.109	0.351	2.25321e-38	2
Prosbeta2	2.6043e-42	0.883686	0.331	0.122	3.10666e-38	2
CG5493	4.39711e-42	1.09017	0.258	0.077	5.24531e-38	2
CG43340.1	5.09161e-42	-1.24574	0.228	0.477	6.07378e-38	2
Khc-73.1	6.42635e-42	1.07629	0.551	0.314	7.66599e-38	2
Ubx.1	7.92921e-42	-0.897431	0.86	0.855	9.45875e-38	2
CG5910.1	2.56762e-41	-1.28574	0.209	0.461	3.06292e-37	2
Prosalpha7.1	3.36404e-41	0.94473	0.381	0.165	4.01296e-37	2
HDAC6.1	7.56465e-41	-1.19143	0.151	0.404	9.02388e-37	2
MtnA.1	7.71908e-41	0.801951	0.766	0.501	9.20809e-37	2
Pomp	8.26735e-41	0.982227	0.31	0.113	9.86212e-37	2
Parp.1	1.22982e-40	-0.853694	0.518	0.733	1.46705e-36	2
CG1648.1	1.42214e-40	-1.16628	0.439	0.668	1.69647e-36	2
LamC.1	1.45641e-40	0.882491	0.443	0.207	1.73736e-36	2
CG1358.1	1.90531e-40	-1.76272	0.042	0.259	2.27284e-36	2
Drak.1	3.49572e-40	-1.51112	0.481	0.669	4.17004e-36	2
atk.1	5.84872e-40	1.00404	0.325	0.122	6.97694e-36	2
Pmp70.1	3.79367e-39	-1.38206	0.096	0.329	4.52547e-35	2
Droj2.1	3.92397e-39	0.825519	0.59	0.356	4.6809e-35	2
ssp7.1	4.01483e-39	-1.19133	0.269	0.521	4.78929e-35	2
Prat2.1	4.90032e-39	0.713121	0.843	0.69	5.84559e-35	2
CG8485.1	6.4767e-39	-1.3924	0.076	0.304	7.72605e-35	2
CG13784.1	7.10771e-39	-1.03126	0.449	0.674	8.47878e-35	2
CG7920.1	8.02538e-39	-1.23923	0.118	0.355	9.57348e-35	2
AdamTS-A.1	1.08957e-38	-1.91247	0.1	0.328	1.29974e-34	2
rgn.1	1.26275e-38	0.777628	0.641	0.4	1.50634e-34	2
Jabba.1	1.33613e-38	-1.44155	0.108	0.343	1.59388e-34	2
Rpt6.1	1.35651e-38	0.996523	0.35	0.149	1.61818e-34	2
PMCA.1	1.40731e-38	-0.875903	0.397	0.644	1.67878e-34	2
CHES-1-like.1	1.81659e-38	-1.02897	0.303	0.542	2.16701e-34	2
Lsd-1.1	2.16822e-38	-1.33776	0.123	0.37	2.58647e-34	2
tsr.1	2.79791e-38	0.936644	0.409	0.197	3.33762e-34	2
CG2233.1	3.14285e-38	-0.614599	0.849	0.937	3.7491e-34	2
Exn.1	3.55389e-38	0.82864	0.662	0.455	4.23943e-34	2
Rpt1	8.25615e-38	1.02225	0.315	0.127	9.84876e-34	2
CG32369.1	1.43839e-37	0.584933	0.822	0.623	1.71586e-33	2
shrb.1	1.95149e-37	0.902303	0.457	0.234	2.32793e-33	2
CCT1	2.26549e-37	0.960266	0.311	0.119	2.7025e-33	2
PRL-1.1	2.6803e-37	0.970578	0.463	0.245	3.19733e-33	2
Akap200.1	3.24166e-37	-1.1765	0.395	0.608	3.86698e-33	2
c11.1.1	3.5406e-37	0.860967	0.407	0.193	4.22358e-33	2
Yeti.1	3.81536e-37	0.807813	0.747	0.57	4.55134e-33	2
eas.1	5.56796e-37	-1.16019	0.297	0.528	6.64202e-33	2
CG11791.1	5.79304e-37	0.694734	0.615	0.372	6.91051e-33	2
Stip1	1.06765e-36	0.978372	0.275	0.099	1.2736e-32	2
Sdc	3.65522e-36	-0.560867	0.916	0.96	4.36031e-32	2
Usp14	6.18103e-36	0.841164	0.315	0.124	7.37335e-32	2
IM14.1	7.87657e-36	-1.64086	0.055	0.26	9.39596e-32	2
Rpt2	7.92153e-36	0.899417	0.298	0.116	9.4496e-32	2
uex.1	1.17767e-35	-0.776817	0.518	0.724	1.40484e-31	2
Prosbeta3	1.41038e-35	1.0069	0.277	0.102	1.68244e-31	2
Tsp42Ea	1.70734e-35	0.983431	0.286	0.109	2.03669e-31	2
Cyp6w1.1	2.03218e-35	-1.40885	0.062	0.268	2.42419e-31	2
teq.1	2.20029e-35	-1.18485	0.088	0.304	2.62472e-31	2
Pde6.1	2.92696e-35	-1.05374	0.341	0.569	3.49156e-31	2
tai.1	3.15384e-35	-0.633477	0.74	0.884	3.76222e-31	2
psq.1	3.82241e-35	-0.950416	0.336	0.567	4.55975e-31	2
Bet1	4.26481e-35	0.911431	0.273	0.099	5.08749e-31	2
CG14762.1	5.97519e-35	-1.28791	0.227	0.449	7.12781e-31	2
Rpn12	1.02378e-34	0.945638	0.253	0.089	1.22127e-30	2
pyr.1	1.49121e-34	0.902358	0.467	0.24	1.77887e-30	2
wrd.1	1.57126e-34	-0.992247	0.273	0.496	1.87435e-30	2
ap.1	1.74042e-34	-1.44454	0.176	0.399	2.07615e-30	2
whd.1	1.81065e-34	-1.05989	0.34	0.576	2.15992e-30	2
Rbfox1.1	3.85507e-34	-0.949945	0.344	0.573	4.59871e-30	2
Hsp70Ab	4.20428e-34	1.01656	0.327	0.138	5.01529e-30	2
Pdp1.1	5.13608e-34	-0.484208	0.986	0.995	6.12683e-30	2
EDTP.1	6.0837e-34	-1.21742	0.173	0.394	7.25725e-30	2
l(2)41Ab	7.82929e-34	-1.86694	0.201	0.42	9.33955e-30	2
Fer2LCH.1	8.38286e-34	0.585842	0.849	0.71	9.99991e-30	2
CG11594.1	8.52923e-34	-1.24893	0.056	0.254	1.01745e-29	2
Sodh-1.1	1.03001e-33	-1.40464	0.138	0.348	1.22869e-29	2
CCT5	1.0562e-33	0.947279	0.284	0.11	1.25994e-29	2
Lip4.1	1.09656e-33	0.945997	0.57	0.354	1.30809e-29	2
cbt.1	1.75114e-33	-1.21539	0.117	0.331	2.08893e-29	2
CG32767.1	1.83972e-33	-1.02034	0.213	0.445	2.1946e-29	2
LRP1.1	2.80452e-33	-1.20955	0.254	0.483	3.34551e-29	2
cher.1	4.5008e-33	0.663988	0.47	0.232	5.36901e-29	2
sqh	4.87963e-33	0.940157	0.293	0.121	5.82091e-29	2
CG32486.1	7.13288e-33	-1.00892	0.31	0.532	8.50881e-29	2
Dmtn.1	9.14873e-33	-0.88882	0.641	0.785	1.09135e-28	2
Ets98B.1	1.16499e-32	-0.873534	0.345	0.57	1.38972e-28	2
CG17646.1	1.48467e-32	-0.874835	0.791	0.872	1.77107e-28	2
CG15099.1	1.5405e-32	0.783242	0.456	0.244	1.83766e-28	2
Tep4	1.8019e-32	0.888704	0.278	0.105	2.14949e-28	2
CG6067.1	1.87413e-32	-1.12213	0.169	0.386	2.23565e-28	2
CG32425.1	3.13154e-32	-1.19558	0.168	0.387	3.73561e-28	2
kraken.1	3.43273e-32	0.882753	0.379	0.186	4.0949e-28	2
cact.1	4.08604e-32	0.567591	0.78	0.595	4.87424e-28	2
rl.1	4.68455e-32	-0.47907	0.811	0.926	5.5882e-28	2
CCT7	7.86981e-32	0.856278	0.264	0.099	9.3879e-28	2
Pur-alpha.1	1.02374e-31	-0.909096	0.284	0.504	1.22122e-27	2
Cyp4p1.1	1.13941e-31	0.803684	0.472	0.256	1.3592e-27	2
Pak3.1	1.1418e-31	0.770883	0.444	0.237	1.36206e-27	2
CG12012.1	1.23725e-31	0.952288	0.424	0.227	1.47591e-27	2
MCPH1.1	1.45293e-31	0.918978	0.462	0.266	1.7332e-27	2
Fur1	1.46764e-31	-0.65091	0.577	0.765	1.75075e-27	2
pAbp.1	1.54208e-31	0.53059	0.882	0.776	1.83954e-27	2
Ndae1.1	1.82521e-31	-1.48163	0.181	0.391	2.1773e-27	2
pan.1	2.47669e-31	-0.859229	0.421	0.625	2.95444e-27	2
CG11267.1	2.56253e-31	0.943138	0.331	0.152	3.05684e-27	2
Ufd4.1	3.57874e-31	0.769991	0.503	0.293	4.26908e-27	2
ALiX.1	5.78625e-31	0.843232	0.367	0.178	6.90242e-27	2
Rab7.1	5.93468e-31	0.827061	0.448	0.25	7.07948e-27	2
Arf79F.1	8.20315e-31	0.758962	0.624	0.437	9.78553e-27	2
Prosalpha4	8.28186e-31	0.827891	0.291	0.123	9.87943e-27	2
Wdr62.1	1.05477e-30	0.870904	0.725	0.585	1.25823e-26	2
LpR2.1	1.20279e-30	-0.996204	0.825	0.854	1.43481e-26	2
Gdh.1	1.29744e-30	0.888082	0.538	0.334	1.54772e-26	2
eff.1	1.5016e-30	0.708809	0.73	0.544	1.79126e-26	2
myo.1	1.64211e-30	-0.966113	0.23	0.442	1.95888e-26	2
gce.1	1.64319e-30	-1.05174	0.338	0.531	1.96016e-26	2
Ald1.1	3.93665e-30	0.579572	0.915	0.871	4.69603e-26	2
CG46385	6.69591e-30	-0.532208	0.912	0.971	7.98755e-26	2
vri.1	7.69011e-30	0.621183	0.656	0.448	9.17353e-26	2
CG7945.1	1.49608e-29	0.914572	0.376	0.192	1.78467e-25	2
nej.1	1.63619e-29	-0.816448	0.354	0.567	1.95181e-25	2
CG10621.1	2.04808e-29	-1.54441	0.124	0.316	2.44315e-25	2
mam.1	2.15955e-29	-0.991069	0.23	0.441	2.57612e-25	2
fus.1	2.6176e-29	-0.838138	0.24	0.453	3.12254e-25	2
elB.1	2.64818e-29	0.632073	0.478	0.256	3.15902e-25	2
Ilp6.1	3.0477e-29	-1.27265	0.159	0.361	3.6356e-25	2
CG4629.1	4.68618e-29	-1.24322	0.108	0.301	5.59014e-25	2
bnl.1	6.84056e-29	0.492944	0.492	0.273	8.1601e-25	2
ogre.1	1.22193e-28	-1.05474	0.114	0.312	1.45764e-24	2
GstE7.1	1.6614e-28	0.886874	0.311	0.141	1.98189e-24	2
aralar1.1	2.1212e-28	0.613708	0.754	0.595	2.53038e-24	2
Spn43Ab.1	4.46936e-28	-0.864729	0.202	0.414	5.33151e-24	2
CG17549.1	4.53363e-28	-0.970835	0.221	0.423	5.40816e-24	2
Ahcy.1	5.32707e-28	0.801646	0.434	0.247	6.35467e-24	2
CG9934	6.03247e-28	0.841713	0.272	0.116	7.19614e-24	2
CG34423	8.95398e-28	0.857466	0.256	0.104	1.06812e-23	2
Helz.1	9.82625e-28	0.347347	0.953	0.894	1.17217e-23	2
MFS14.1	1.36429e-27	-1.23702	0.259	0.448	1.62747e-23	2
Prosbeta1	1.36613e-27	0.888451	0.284	0.127	1.62965e-23	2
Wbp2.1	1.64453e-27	0.751336	0.48	0.288	1.96177e-23	2
BomS3.1	2.5352e-27	-1.24055	0.288	0.481	3.02424e-23	2
osp.1	3.06876e-27	-1.10956	0.168	0.368	3.66072e-23	2
CG6115.1	3.35671e-27	0.707078	0.574	0.381	4.00422e-23	2
CG42674.1	3.58231e-27	-0.910823	0.247	0.45	4.27334e-23	2
Pdk1.1	3.78718e-27	0.648965	0.798	0.71	4.51773e-23	2
Gadd45.1	3.87294e-27	0.751551	0.371	0.186	4.62003e-23	2
sqd.1	5.12594e-27	-0.516176	0.72	0.871	6.11473e-23	2
Syb.1	5.39261e-27	0.836927	0.454	0.273	6.43284e-23	2
AOX1.1	7.0613e-27	0.664313	0.482	0.285	8.42343e-23	2
Lpin.1	8.29169e-27	0.87372	0.613	0.438	9.89116e-23	2
Rel.1	9.06664e-27	0.580911	0.69	0.486	1.08156e-22	2
frma.1	9.54167e-27	-0.98527	0.141	0.331	1.13823e-22	2
yuri.1	4.11031e-26	0.754199	0.447	0.262	4.90319e-22	2
CG42663.1	4.16916e-26	-1.08028	0.137	0.324	4.97339e-22	2
ATPCL.1	4.25498e-26	-1.02808	0.264	0.459	5.07577e-22	2
retm.1	4.53438e-26	-1.16591	0.151	0.331	5.40906e-22	2
CG10960.1	5.88544e-26	-0.95193	0.816	0.838	7.02074e-22	2
CG16758	8.59465e-26	0.401336	0.981	0.901	1.02526e-21	2
Nadsyn.1	9.81905e-26	-1.05097	0.15	0.332	1.17131e-21	2
CG10082.1	1.072e-25	-1.04855	0.504	0.638	1.27879e-21	2
CG42238.1	1.69297e-25	-0.897039	0.236	0.435	2.01955e-21	2
Prosbeta6	2.00401e-25	0.834513	0.269	0.12	2.39059e-21	2
RhoGAP15B.1	2.63324e-25	0.809707	0.358	0.185	3.14119e-21	2
aqz.1	3.10678e-25	0.538968	0.972	0.94	3.70608e-21	2
upSET.1	4.09679e-25	-0.810183	0.274	0.467	4.88706e-21	2
ValRS	6.51183e-25	0.77606	0.278	0.125	7.76797e-21	2
Pdha.1	6.70481e-25	-0.880984	0.103	0.282	7.99817e-21	2
CG44008.1	6.76105e-25	0.783185	0.383	0.213	8.06526e-21	2
nrv1.1	7.14716e-25	0.779023	0.381	0.206	8.52585e-21	2
tamo	8.65857e-25	0.777744	0.284	0.13	1.03288e-20	2
Gug.1	9.2095e-25	-0.706597	0.523	0.682	1.0986e-20	2
Cyp6d5.1	9.53748e-25	-1.05461	0.203	0.395	1.13773e-20	2
GstE3.1	1.05909e-24	0.767923	0.332	0.165	1.26339e-20	2
Shmt.1	1.19145e-24	0.659932	0.727	0.576	1.42128e-20	2
ftz-f1.1	1.35887e-24	-0.671792	0.476	0.662	1.621e-20	2
Trx-2.1	1.64613e-24	0.579126	0.433	0.241	1.96367e-20	2
fbp.1	2.41803e-24	-0.966174	0.181	0.362	2.88447e-20	2
MTA1-like.1	2.44867e-24	0.372531	0.589	0.381	2.92102e-20	2
CIAPIN1	2.47845e-24	0.736935	0.27	0.121	2.95654e-20	2
Pepck2	2.56393e-24	0.882234	0.321	0.163	3.05851e-20	2
Oatp74D.1	2.67955e-24	-0.848726	0.217	0.409	3.19643e-20	2
BomBc2.1	2.89064e-24	-0.988059	0.43	0.6	3.44824e-20	2
Tis11	3.71566e-24	0.447132	0.942	0.901	4.43241e-20	2
EcR.1	4.14971e-24	-0.842441	0.338	0.514	4.95019e-20	2
Cyp309a1.1	4.41588e-24	0.732039	0.367	0.196	5.2677e-20	2
REPTOR.1	5.71901e-24	0.599838	0.797	0.691	6.8222e-20	2
DnaJ-H	7.2597e-24	0.746787	0.28	0.131	8.6601e-20	2
scrib.1	8.63682e-24	-0.918439	0.241	0.421	1.03029e-19	2
CG8036.1	9.34073e-24	-0.875904	0.212	0.402	1.11426e-19	2
Rab11.1	1.06194e-23	0.750565	0.496	0.323	1.26679e-19	2
CG3764.1	1.42208e-23	-1.06922	0.169	0.341	1.69639e-19	2
Pfrx.1	1.50288e-23	-0.910194	0.166	0.34	1.79279e-19	2
CCT2.1	1.87267e-23	0.762334	0.382	0.215	2.2339e-19	2
Cyp28a5.1	3.02335e-23	0.722609	0.296	0.142	3.60656e-19	2
CG8745.1	3.12029e-23	-1.61898	0.24	0.41	3.72219e-19	2
CAH1.1	3.81133e-23	-1.10896	0.129	0.301	4.54654e-19	2
DIP-lambda	4.64131e-23	-1.55898	0.148	0.318	5.53662e-19	2
Mur2B.1	4.79657e-23	-0.765953	0.291	0.483	5.72183e-19	2
CG4716.1	5.8384e-23	-0.585289	0.793	0.879	6.96462e-19	2
step.1	6.38416e-23	0.659314	0.561	0.394	7.61567e-19	2
CG15293.1	8.73438e-23	-0.777739	0.305	0.494	1.04192e-18	2
CG9005.1	9.03017e-23	-0.826565	0.237	0.414	1.07721e-18	2
mop	1.09347e-22	0.695638	0.298	0.147	1.30441e-18	2
GstE9.1	1.51367e-22	0.829004	0.374	0.213	1.80566e-18	2
goe.1	1.59871e-22	-1.0674	0.145	0.313	1.9071e-18	2
Acbp2.1	1.79662e-22	-0.903845	0.178	0.359	2.14319e-18	2
Piezo.1	2.03479e-22	0.383793	0.556	0.354	2.4273e-18	2
CG30423	2.36272e-22	0.746623	0.25	0.113	2.81848e-18	2
Hipk.1	2.65239e-22	0.56147	0.769	0.659	3.16404e-18	2
CG1640.1	2.70788e-22	-0.940073	0.142	0.31	3.23023e-18	2
jim.1	4.13045e-22	-0.747888	0.391	0.558	4.92722e-18	2
Lis-1.1	4.2674e-22	0.668869	0.494	0.322	5.09059e-18	2
kis.1	4.32025e-22	-0.536871	0.577	0.739	5.15362e-18	2
cl	4.36687e-22	0.760608	0.25	0.116	5.20924e-18	2
Spat.1	6.13841e-22	1.02915	0.565	0.429	7.32251e-18	2
Smg6.1	6.47887e-22	0.798434	0.34	0.185	7.72864e-18	2
CG16926.1	6.65938e-22	-0.703088	0.505	0.662	7.94398e-18	2
Mnt.1	6.81518e-22	-0.711706	0.398	0.565	8.12983e-18	2
hzg.1	6.89725e-22	-0.79431	0.17	0.346	8.22773e-18	2
Rbp1-like.1	1.27884e-21	-0.907942	0.143	0.307	1.52553e-17	2
hebe	1.58331e-21	0.754163	0.287	0.144	1.88872e-17	2
Bacc.1	2.11164e-21	-0.557941	0.661	0.787	2.51897e-17	2
spict	2.16459e-21	0.736589	0.258	0.122	2.58214e-17	2
Tet.1	2.44069e-21	0.789152	0.666	0.533	2.9115e-17	2
NAT1.1	2.50429e-21	0.524216	0.78	0.666	2.98736e-17	2
Hsc70-5.1	3.02946e-21	0.659549	0.409	0.24	3.61384e-17	2
Pdk	3.06259e-21	0.477165	0.873	0.859	3.65337e-17	2
foxo.1	3.10346e-21	-0.62278	0.652	0.767	3.70212e-17	2
Nop17l.1	3.6128e-21	0.593543	0.543	0.371	4.30971e-17	2
CG9691.1	4.45797e-21	-0.794689	0.211	0.387	5.31791e-17	2
zormin.1	5.72736e-21	0.645345	0.542	0.367	6.83217e-17	2
cdi.1	6.45857e-21	0.64235	0.527	0.36	7.70442e-17	2
Clc	8.2713e-21	0.710922	0.259	0.124	9.86684e-17	2
lqf.1	1.06683e-20	0.677046	0.646	0.53	1.27263e-16	2
Ttd14.1	1.12968e-20	-0.873244	0.156	0.323	1.34759e-16	2
p47	1.46042e-20	0.752852	0.255	0.122	1.74213e-16	2
CG17124.1	1.6573e-20	-0.875415	0.688	0.769	1.97699e-16	2
Hex-C.1	1.67634e-20	-0.756305	0.316	0.489	1.99971e-16	2
Swip-1.1	1.99478e-20	0.537835	0.544	0.353	2.37957e-16	2
srp.1	2.16488e-20	-0.705108	0.527	0.666	2.58249e-16	2
RhoGAP68F.1	2.45354e-20	0.745523	0.331	0.185	2.92683e-16	2
Oda.1	3.08489e-20	0.501478	0.873	0.806	3.67997e-16	2
Cyp6g1.1	3.74082e-20	-0.847027	0.28	0.444	4.46242e-16	2
PyK.1	4.58094e-20	-0.794039	0.179	0.345	5.4646e-16	2
gpp.1	4.6592e-20	-0.669507	0.515	0.652	5.55796e-16	2
RpL23.1	5.8088e-20	0.617677	0.774	0.666	6.92932e-16	2
Socs36E.1	6.27891e-20	0.372028	0.466	0.276	7.49011e-16	2
gw.1	6.86799e-20	-0.575318	0.43	0.602	8.19282e-16	2
fon.1	7.42111e-20	-0.937439	0.192	0.353	8.85264e-16	2
SPARC.1	7.62524e-20	-0.758607	0.178	0.349	9.09615e-16	2
Efa6.1	7.77081e-20	0.724158	0.405	0.253	9.2698e-16	2
unc-13.1	9.87216e-20	-0.823922	0.34	0.5	1.17765e-15	2
Dif.1	9.9426e-20	-0.981732	0.279	0.431	1.18605e-15	2
bchs	1.49666e-19	0.673923	0.279	0.141	1.78536e-15	2
LRR.1	1.789e-19	0.33551	0.669	0.475	2.1341e-15	2
tkv.1	1.86772e-19	-0.910421	0.278	0.431	2.228e-15	2
scyl.1	2.04006e-19	0.358664	0.904	0.776	2.43358e-15	2
RpL21.1	2.13276e-19	0.605079	0.712	0.583	2.54418e-15	2
Dbp80	2.33088e-19	-0.444911	0.529	0.7	2.7805e-15	2
CG6330.1	2.65336e-19	0.639199	0.423	0.253	3.1652e-15	2
CG31145.1	3.00222e-19	-0.559629	0.638	0.765	3.58135e-15	2
Caper.1	3.02542e-19	-0.587533	0.569	0.705	3.60903e-15	2
DIP-alpha.1	3.43222e-19	-0.837955	0.855	0.914	4.09429e-15	2
daw.1	4.30749e-19	-0.805941	0.263	0.431	5.13841e-15	2
dos.1	4.50748e-19	0.575806	0.294	0.151	5.37697e-15	2
CG6966.1	6.77166e-19	0.803179	0.558	0.412	8.07792e-15	2
Npc2g.1	7.14707e-19	-0.776124	0.222	0.388	8.52574e-15	2
Ac13E.1	7.30275e-19	-0.924858	0.146	0.298	8.71145e-15	2
Dys.1	7.57445e-19	-0.619411	0.442	0.607	9.03556e-15	2
CaMKII.1	7.86933e-19	-0.737428	0.195	0.356	9.38732e-15	2
Lst.1	8.27739e-19	0.508493	0.857	0.772	9.8741e-15	2
S6k.1	8.99187e-19	-0.656943	0.36	0.52	1.07264e-14	2
RpL37a.1	1.29123e-18	0.678019	0.68	0.557	1.54031e-14	2
cpx	1.35236e-18	-0.94625	0.22	0.372	1.61324e-14	2
l(1)G0289.1	1.3959e-18	0.521962	0.603	0.43	1.66516e-14	2
CG31635.1	1.59594e-18	-0.718827	0.438	0.589	1.9038e-14	2
l(3)80Fj.1	1.95587e-18	-0.482791	0.656	0.786	2.33316e-14	2
RhoGAP19D.1	2.22691e-18	-0.939836	0.373	0.518	2.65649e-14	2
CG17278.1	2.51573e-18	0.586122	0.409	0.252	3.00102e-14	2
CG34054.1	2.77934e-18	0.743202	0.292	0.156	3.31548e-14	2
alpha-Man-Ia.1	3.19373e-18	-0.829344	0.244	0.399	3.8098e-14	2
anne.1	3.21421e-18	-0.794735	0.151	0.298	3.83423e-14	2
Mthfs	3.4253e-18	0.788496	0.297	0.166	4.08604e-14	2
RhoGAP71E.1	3.51433e-18	0.604947	0.53	0.392	4.19225e-14	2
CG33493.1	3.798e-18	-0.853739	0.114	0.26	4.53063e-14	2
stx.1	3.82915e-18	-0.827481	0.278	0.435	4.5678e-14	2
ScsbetaA.1	6.92631e-18	-0.505669	0.35	0.525	8.26239e-14	2
CG43736.1	8.46823e-18	-0.733902	0.208	0.367	1.01017e-13	2
MCU.1	9.88494e-18	0.656364	0.4	0.247	1.17917e-13	2
larp.1	1.08165e-17	-0.65564	0.485	0.62	1.2903e-13	2
Pcyt1.1	1.08323e-17	0.520305	0.599	0.441	1.29218e-13	2
His4r.1	1.34824e-17	0.762811	0.36	0.225	1.60831e-13	2
CLIP-190	1.36505e-17	-0.434921	0.558	0.713	1.62836e-13	2
CG30015.1	1.37533e-17	0.381995	0.867	0.763	1.64063e-13	2
RpL28.1	1.65759e-17	0.623396	0.793	0.706	1.97733e-13	2
rdx.1	1.91211e-17	-0.565318	0.497	0.63	2.28096e-13	2
RpL27A.1	1.95265e-17	0.662218	0.783	0.706	2.32931e-13	2
mew.1	1.98064e-17	-1.09003	0.28	0.425	2.3627e-13	2
CG10600.1	2.76067e-17	0.64355	0.32	0.182	3.2932e-13	2
RpS11.1	3.75178e-17	0.678393	0.714	0.597	4.4755e-13	2
Pfk.1	5.00488e-17	-0.665759	0.122	0.264	5.97033e-13	2
NUCB1.1	5.34546e-17	0.577707	0.331	0.19	6.3766e-13	2
milt.1	5.47151e-17	-0.677998	0.303	0.457	6.52697e-13	2
Ire1.1	5.596e-17	0.592953	0.428	0.28	6.67547e-13	2
Lac	5.7203e-17	0.654403	0.259	0.134	6.82375e-13	2
CG14154	6.20014e-17	-0.593715	0.34	0.503	7.39615e-13	2
l(3)L1231.1	6.66025e-17	-0.56175	0.49	0.624	7.94501e-13	2
CG12054.1	7.32247e-17	-0.661782	0.27	0.428	8.73497e-13	2
conu.1	7.93042e-17	-0.575469	0.395	0.541	9.4602e-13	2
Fis1.1	7.99446e-17	0.735307	0.32	0.193	9.53659e-13	2
Rab1.1	8.03175e-17	0.579777	0.423	0.273	9.58107e-13	2
Obp99c.1	8.91645e-17	-0.377659	0.648	0.788	1.06364e-12	2
Plc21C	9.53598e-17	-0.563448	0.463	0.609	1.13755e-12	2
RpL14.1	9.99092e-17	0.578388	0.746	0.645	1.19182e-12	2
Tab2.1	1.0506e-16	0.539945	0.52	0.366	1.25326e-12	2
RasGAP1.1	1.12987e-16	0.638619	0.386	0.242	1.34782e-12	2
CG30026	1.18028e-16	0.770127	0.264	0.14	1.40796e-12	2
mys.1	1.33409e-16	0.593697	0.503	0.356	1.59143e-12	2
RpS15.1	1.43358e-16	0.634819	0.759	0.654	1.71012e-12	2
CG6512	1.70967e-16	0.67352	0.266	0.143	2.03946e-12	2
cwo.1	1.79175e-16	-0.466969	0.819	0.899	2.13738e-12	2
svp.1	2.08404e-16	-0.596096	0.409	0.567	2.48605e-12	2
mrva.1	2.89535e-16	0.717467	0.397	0.266	3.45387e-12	2
lolal.1	3.20883e-16	-0.668419	0.194	0.344	3.82781e-12	2
Mitf.1	3.27621e-16	-0.704794	0.192	0.332	3.9082e-12	2
CG13887	3.93239e-16	0.632191	0.25	0.133	4.69095e-12	2
poe.1	4.36974e-16	0.540655	0.453	0.302	5.21266e-12	2
Sirt1	4.58843e-16	0.71493	0.317	0.19	5.47354e-12	2
baz.1	4.59716e-16	0.624997	0.336	0.202	5.48395e-12	2
kst.1	5.89943e-16	-0.950626	0.184	0.322	7.03743e-12	2
CG12065.1	6.37087e-16	0.702925	0.398	0.261	7.59981e-12	2
Galk.1	6.60083e-16	-0.718265	0.402	0.535	7.87413e-12	2
Diap1.1	6.83031e-16	0.466171	0.801	0.73	8.14788e-12	2
Snx6	6.98931e-16	0.612424	0.288	0.162	8.33755e-12	2
Galt.1	8.07637e-16	-0.732817	0.117	0.251	9.6343e-12	2
PHGPx.1	8.27584e-16	0.664401	0.478	0.343	9.87225e-12	2
Clk.1	9.19982e-16	-0.769036	0.135	0.268	1.09745e-11	2
Cyp4g1.1	9.427e-16	0.886537	0.473	0.335	1.12455e-11	2
Gprk1.1	9.86603e-16	-0.645625	0.236	0.384	1.17692e-11	2
Rac2.1	1.03994e-15	0.569593	0.412	0.274	1.24055e-11	2
IM33.1	1.23859e-15	-0.852345	0.255	0.406	1.47751e-11	2
santa-maria.1	1.29757e-15	-0.658077	0.154	0.298	1.54787e-11	2
Rab5.1	1.52416e-15	0.596778	0.445	0.314	1.81817e-11	2
Cf2.1	1.55427e-15	-0.645158	0.242	0.385	1.85409e-11	2
Bsg	1.56001e-15	0.276082	0.977	0.984	1.86094e-11	2
kibra.1	1.65887e-15	0.582321	0.547	0.411	1.97887e-11	2
Pli.1	1.706e-15	-0.841762	0.477	0.594	2.03509e-11	2
SP1173.1	1.70953e-15	0.523914	0.288	0.16	2.0393e-11	2
E(spl)malpha-BFM	1.83956e-15	-0.585212	0.231	0.385	2.19441e-11	2
Jafrac1.1	1.93016e-15	0.539525	0.5	0.356	2.30249e-11	2
Syx1A.1	2.4207e-15	0.527104	0.637	0.519	2.88766e-11	2
CG3829.1	2.67919e-15	-0.66295	0.218	0.36	3.19601e-11	2
fz2	2.71729e-15	-0.896322	0.176	0.316	3.24145e-11	2
hfp.1	2.79813e-15	-0.698398	0.202	0.336	3.33789e-11	2
trx.1	2.81926e-15	-0.517582	0.383	0.539	3.3631e-11	2
LPCAT.1	3.29153e-15	0.602095	0.298	0.174	3.92646e-11	2
Mical.1	3.89431e-15	-0.79041	0.201	0.343	4.64552e-11	2
eIF4A.1	4.04366e-15	0.494737	0.687	0.579	4.82369e-11	2
fs(1)h.1	7.03382e-15	-0.434162	0.633	0.755	8.39064e-11	2
Stlk.1	7.13073e-15	-0.673426	0.194	0.329	8.50625e-11	2
Gbp3.1	7.3386e-15	-0.704405	0.168	0.301	8.75422e-11	2
blw.1	9.54822e-15	-0.612021	0.307	0.456	1.13901e-10	2
Imp.1	1.28288e-14	-0.508644	0.504	0.64	1.53035e-10	2
Ubqn.1	1.35445e-14	0.575826	0.353	0.224	1.61572e-10	2
mub.1	1.58427e-14	-0.655281	0.128	0.256	1.88987e-10	2
pst.1	1.68914e-14	0.494517	0.661	0.558	2.01498e-10	2
RpL27.1	1.69503e-14	0.685072	0.671	0.588	2.02201e-10	2
Lk6.1	2.37588e-14	0.315562	0.928	0.886	2.83418e-10	2
ppl.1	2.49233e-14	-0.683639	0.131	0.261	2.97309e-10	2
Lmpt.1	4.04376e-14	0.532154	0.553	0.419	4.8238e-10	2
wun	4.0617e-14	0.585156	0.273	0.155	4.84521e-10	2
Sam-S.1	4.59041e-14	-0.752549	0.516	0.646	5.4759e-10	2
CG42324.1	4.75163e-14	-0.486272	0.553	0.669	5.66822e-10	2
Btk29A	4.95061e-14	-0.781246	0.14	0.266	5.90558e-10	2
CG6910.1	5.09924e-14	0.456077	0.839	0.732	6.08288e-10	2
BomS2	5.42911e-14	-1.03942	0.296	0.428	6.47638e-10	2
RpL34b.1	5.99275e-14	0.603391	0.61	0.512	7.14876e-10	2
bgm.1	6.54268e-14	-0.684952	0.562	0.66	7.80476e-10	2
Eb1.1	6.54642e-14	0.522374	0.345	0.216	7.80922e-10	2
iPLA2-VIA	6.68042e-14	0.537086	0.269	0.154	7.96907e-10	2
Cka.1	7.00497e-14	-0.6101	0.216	0.353	8.35623e-10	2
Vha13.1	8.84229e-14	0.741229	0.327	0.213	1.0548e-09	2
ens.1	9.54642e-14	0.529275	0.567	0.463	1.13879e-09	2
CG17691.1	9.77536e-14	-0.534752	0.346	0.486	1.1661e-09	2
CG34136.1	9.84306e-14	0.606839	0.371	0.24	1.17418e-09	2
CG3168.1	1.12174e-13	0.561784	0.392	0.262	1.33812e-09	2
bic.1	1.21261e-13	0.530516	0.484	0.363	1.44652e-09	2
sxc.1	1.318e-13	-0.604987	0.24	0.375	1.57224e-09	2
ATPsynC.1	1.50485e-13	-0.498195	0.349	0.495	1.79514e-09	2
Myc	1.65314e-13	-0.646258	0.586	0.682	1.97203e-09	2
Sh3beta.1	2.14419e-13	0.526913	0.297	0.177	2.5578e-09	2
CG4297.1	2.85669e-13	-0.611744	0.143	0.268	3.40775e-09	2
Hn.1	2.97689e-13	0.486328	0.505	0.367	3.55113e-09	2
GstE12.1	3.09645e-13	-0.558727	0.156	0.285	3.69376e-09	2
Cdep.1	3.28251e-13	-0.641752	0.266	0.4	3.9157e-09	2
Not1.1	3.52866e-13	0.328919	0.806	0.723	4.20934e-09	2
puml.1	3.73455e-13	0.550802	0.299	0.182	4.45495e-09	2
mura.1	4.03451e-13	-0.540066	0.406	0.534	4.81277e-09	2
CG10680.1	4.98103e-13	-0.557366	0.315	0.452	5.94187e-09	2
Gel.1	6.29918e-13	-0.553758	0.36	0.495	7.51429e-09	2
RpS25.1	6.69332e-13	0.652251	0.646	0.552	7.98446e-09	2
RpS10b.1	6.85553e-13	0.603638	0.694	0.624	8.17796e-09	2
IscU.1	6.98314e-13	0.504373	0.516	0.391	8.33019e-09	2
Fit1.1	7.09057e-13	0.655717	0.315	0.2	8.45835e-09	2
RpL5.1	7.89719e-13	0.493551	0.662	0.575	9.42056e-09	2
RpL31.1	8.5302e-13	0.586627	0.659	0.558	1.01757e-08	2
Sap-r.1	8.96671e-13	0.503659	0.629	0.528	1.06964e-08	2
CG44774.1	9.80094e-13	0.566615	0.345	0.227	1.16915e-08	2
tay.1	1.01954e-12	-0.518538	0.312	0.448	1.21621e-08	2
Mal-B2.1	1.02522e-12	0.479484	0.618	0.494	1.22299e-08	2
Pi3K92E	1.06151e-12	0.561247	0.283	0.172	1.26628e-08	2
Nipped-A.1	1.07935e-12	-0.541017	0.188	0.319	1.28755e-08	2
RpL35.1	1.10011e-12	0.589831	0.622	0.517	1.31232e-08	2
CG3902.1	1.15713e-12	-0.83131	0.217	0.338	1.38035e-08	2
robo2.1	1.16059e-12	0.498487	0.522	0.389	1.38447e-08	2
RpL12.1	1.18457e-12	0.568042	0.656	0.575	1.41307e-08	2
CG3597.1	1.19933e-12	-0.634929	0.155	0.275	1.43069e-08	2
RpS3A.1	1.22452e-12	0.475744	0.648	0.544	1.46074e-08	2
RpS28b.1	1.22642e-12	0.68759	0.565	0.474	1.463e-08	2
Nrg	1.53139e-12	-0.718953	0.176	0.299	1.8268e-08	2
RpL8.1	1.53552e-12	0.480364	0.74	0.643	1.83172e-08	2
Synd.1	1.54577e-12	0.558311	0.364	0.245	1.84394e-08	2
RpLP1.1	1.69018e-12	0.527908	0.708	0.604	2.01621e-08	2
CG9451.1	1.77462e-12	0.601801	0.319	0.202	2.11694e-08	2
CG18659.1	1.84557e-12	0.635687	0.345	0.23	2.20158e-08	2
MESR3	1.88895e-12	0.660395	0.301	0.186	2.25333e-08	2
comm2.1	1.96956e-12	0.368965	0.364	0.229	2.34948e-08	2
PNUTS	2.01983e-12	-0.447447	0.522	0.639	2.40946e-08	2
KrT95D.1	2.47274e-12	0.431265	0.755	0.661	2.94973e-08	2
RpS27A.1	2.58686e-12	0.588194	0.708	0.636	3.08587e-08	2
SREBP.1	2.91247e-12	0.479172	0.504	0.389	3.47429e-08	2
Vinc	3.11963e-12	0.52516	0.263	0.156	3.72141e-08	2
Doa.1	3.24368e-12	-0.479396	0.423	0.553	3.86939e-08	2
Cyp28d1.1	3.41842e-12	0.484848	0.306	0.189	4.07783e-08	2
CG42668.1	3.67864e-12	0.356465	0.694	0.567	4.38825e-08	2
ImpL2.1	3.7948e-12	0.377577	0.341	0.216	4.52681e-08	2
CG8369	4.01241e-12	0.59112	0.25	0.148	4.7864e-08	2
CdGAPr	4.25733e-12	0.624636	0.269	0.165	5.07857e-08	2
Mlf	4.76609e-12	0.573323	0.253	0.15	5.68547e-08	2
Pitslre	4.8949e-12	-0.391351	0.31	0.449	5.83913e-08	2
GstT1	5.23402e-12	0.586161	0.26	0.154	6.24366e-08	2
Ctl2.1	5.57342e-12	0.575997	0.264	0.162	6.64853e-08	2
RpL24.1	6.58403e-12	0.593287	0.678	0.581	7.85409e-08	2
CG31694.1	6.65742e-12	0.385576	0.475	0.343	7.94163e-08	2
Thd1.1	6.6762e-12	-0.487077	0.357	0.487	7.96404e-08	2
CG31183	7.05811e-12	-0.488524	0.473	0.591	8.41962e-08	2
corto.1	7.32378e-12	-0.644671	0.402	0.515	8.73653e-08	2
CG6287	8.26584e-12	0.444382	0.641	0.521	9.86032e-08	2
CG6700.1	1.14873e-11	-0.462041	0.312	0.449	1.37032e-07	2
CG15784.1	1.26001e-11	0.60984	0.319	0.208	1.50306e-07	2
sws.1	1.35523e-11	-0.577342	0.194	0.316	1.61665e-07	2
Col4a1	1.5879e-11	-0.65593	0.142	0.258	1.89421e-07	2
IP3K2	1.76592e-11	-0.478118	0.589	0.682	2.10656e-07	2
CG31705.1	1.90022e-11	0.392274	0.646	0.545	2.26677e-07	2
lap.1	1.96521e-11	-0.599044	0.22	0.334	2.34429e-07	2
Sik3.1	2.06771e-11	-0.441147	0.405	0.534	2.46657e-07	2
CtBP	2.17558e-11	-0.397826	0.519	0.638	2.59525e-07	2
PAPLA1.1	2.23969e-11	0.353176	0.593	0.461	2.67173e-07	2
RpL35A.1	2.24071e-11	0.529064	0.622	0.533	2.67295e-07	2
CG42369.1	2.31031e-11	-0.620638	0.145	0.252	2.75597e-07	2
CtsB1	2.31972e-11	0.509626	0.585	0.478	2.76719e-07	2
RpS5a.1	2.31993e-11	0.52233	0.586	0.492	2.76744e-07	2
Apoltp.1	3.79476e-11	0.25767	0.855	0.773	4.52677e-07	2
RpL17.1	4.01586e-11	0.500225	0.737	0.656	4.79052e-07	2
cu.1	4.24686e-11	0.465999	0.572	0.461	5.06608e-07	2
CG44014	4.81684e-11	0.539737	0.253	0.153	5.74601e-07	2
Cbs.1	5.35753e-11	-0.629613	0.175	0.287	6.391e-07	2
CG7220.1	5.72844e-11	-0.695928	0.151	0.255	6.83346e-07	2
Sin3A.1	5.89974e-11	-0.512546	0.382	0.494	7.03779e-07	2
CG34347.1	7.1209e-11	-0.864689	0.299	0.404	8.49452e-07	2
CG33494.1	7.13029e-11	0.463857	0.411	0.289	8.50572e-07	2
RpS23.1	7.4919e-11	0.534974	0.734	0.658	8.93709e-07	2
bip2.1	8.71431e-11	-0.462603	0.381	0.501	1.03953e-06	2
E(bx).1	9.93558e-11	-0.587716	0.188	0.295	1.18521e-06	2
Letm1.1	1.11736e-10	0.618866	0.338	0.237	1.3329e-06	2
Ptpmeg2	1.13986e-10	-0.643889	0.151	0.255	1.35974e-06	2
mts.1	1.15269e-10	0.458127	0.451	0.344	1.37504e-06	2
Blimp-1.1	1.15734e-10	-0.409583	0.619	0.725	1.38059e-06	2
Trpm.1	1.26065e-10	-0.458388	0.242	0.363	1.50383e-06	2
RpL18A.1	1.29166e-10	0.554353	0.671	0.604	1.54082e-06	2
p23.1	1.29625e-10	0.545563	0.319	0.216	1.54629e-06	2
Mvl	1.44612e-10	0.496146	0.251	0.155	1.72508e-06	2
eEF5.1	1.4551e-10	0.602733	0.608	0.519	1.73579e-06	2
Aldh	1.87366e-10	-0.502216	0.459	0.571	2.23508e-06	2
CG31678.1	2.14275e-10	0.427161	0.302	0.193	2.55609e-06	2
RpS29.1	2.44359e-10	0.586854	0.636	0.554	2.91496e-06	2
Tl.1	2.59603e-10	0.426591	0.657	0.569	3.0968e-06	2
RpS7.1	2.90313e-10	0.481203	0.735	0.661	3.46315e-06	2
mei-P26.1	3.12181e-10	-0.440241	0.341	0.469	3.72401e-06	2
swm.1	4.00212e-10	0.482826	0.412	0.301	4.77413e-06	2
CG6051.1	4.14529e-10	0.325568	0.631	0.517	4.94492e-06	2
CG1943.1	4.36249e-10	0.5222	0.286	0.188	5.20402e-06	2
RpL7.1	4.77033e-10	0.50338	0.665	0.587	5.69053e-06	2
CG8206	4.96437e-10	0.528753	0.288	0.188	5.92199e-06	2
RpS12.1	5.13204e-10	0.606399	0.651	0.582	6.12201e-06	2
eEF2.1	5.18682e-10	0.314179	0.802	0.741	6.18736e-06	2
Gbs-76A.1	6.00994e-10	-0.460412	0.321	0.444	7.16925e-06	2
cv-2	6.18851e-10	-0.590974	0.401	0.5	7.38228e-06	2
alt.1	7.18092e-10	0.516434	0.431	0.334	8.56612e-06	2
fog.1	7.82899e-10	-0.577042	0.154	0.254	9.3392e-06	2
Hel89B	8.20917e-10	0.51769	0.272	0.174	9.79272e-06	2
Mst84Da.1	8.29703e-10	0.664681	0.395	0.296	9.89752e-06	2
CG4538.1	8.51627e-10	0.461611	0.365	0.262	1.01591e-05	2
Set1.1	8.71812e-10	0.425575	0.433	0.321	1.03998e-05	2
CG12290.1	8.79575e-10	0.400679	0.364	0.248	1.04924e-05	2
l(3)05822.1	9.29504e-10	0.473007	0.284	0.186	1.1088e-05	2
Rab2	9.72574e-10	0.534562	0.268	0.175	1.16018e-05	2
Sfxn1-3.1	1.02373e-09	0.468369	0.439	0.338	1.22121e-05	2
wdb.1	1.13152e-09	-0.376811	0.584	0.674	1.34979e-05	2
DOR.1	1.1887e-09	-0.634567	0.551	0.628	1.41801e-05	2
RpL15.1	1.28595e-09	0.529931	0.701	0.63	1.534e-05	2
mbc	1.42121e-09	-0.454392	0.178	0.289	1.69537e-05	2
CG6770.1	1.46378e-09	-0.314871	0.904	0.924	1.74614e-05	2
caps.1	1.47766e-09	0.424254	0.577	0.476	1.7627e-05	2
CG17734.1	1.61548e-09	-0.520605	0.178	0.28	1.92711e-05	2
CG16721	1.66628e-09	0.457041	0.284	0.185	1.98771e-05	2
Gmap.1	1.7913e-09	-0.314432	0.379	0.509	2.13684e-05	2
Unc-76	1.9515e-09	0.469628	0.315	0.212	2.32795e-05	2
CG7530.1	2.2503e-09	-0.612606	0.226	0.328	2.68439e-05	2
CG10543	2.44995e-09	-0.539609	0.245	0.346	2.92254e-05	2
Gale.1	2.49254e-09	-0.598904	0.166	0.262	2.97335e-05	2
Crag	2.586e-09	0.514696	0.284	0.188	3.08484e-05	2
east.1	2.81823e-09	-0.537927	0.164	0.263	3.36186e-05	2
CG10799.1	2.93746e-09	0.363186	0.579	0.478	3.5041e-05	2
RpS27.1	3.69855e-09	0.451578	0.699	0.641	4.412e-05	2
CG32549	3.82188e-09	-0.433519	0.607	0.701	4.55912e-05	2
CG8963	4.11253e-09	0.432395	0.273	0.177	4.90583e-05	2
Pzl.1	4.22532e-09	-0.497198	0.184	0.287	5.04038e-05	2
Trp1.1	4.25419e-09	0.4945	0.306	0.212	5.07482e-05	2
Ubc6.1	4.64322e-09	0.432315	0.345	0.245	5.5389e-05	2
jing	4.7447e-09	-0.47211	0.157	0.257	5.65995e-05	2
D2hgdh.1	5.12515e-09	-0.531952	0.228	0.331	6.11379e-05	2
ttk	5.39332e-09	-0.514565	0.176	0.278	6.43369e-05	2
MSBP.1	6.59422e-09	0.489795	0.357	0.262	7.86624e-05	2
how	8.00618e-09	-0.362792	0.467	0.567	9.55057e-05	2
Pect.1	9.07295e-09	-0.610481	0.504	0.578	0.000108231	2
Cyp1.1	9.92982e-09	0.446332	0.458	0.37	0.000118453	2
prage	1.00149e-08	0.322218	0.801	0.718	0.000119468	2
kra.1	1.00206e-08	0.3421	0.613	0.525	0.000119536	2
RpL32.1	1.18868e-08	0.484085	0.673	0.616	0.000141798	2
sesB.1	1.21082e-08	-0.400802	0.414	0.518	0.000144438	2
CG2991.1	1.25645e-08	0.33425	0.268	0.175	0.000149882	2
CG13868.1	1.28495e-08	-0.370292	0.702	0.761	0.000153282	2
Ank.1	1.47679e-08	-0.392575	0.418	0.515	0.000176167	2
mnb	1.61375e-08	-0.52829	0.339	0.429	0.000192504	2
siz.1	1.76749e-08	0.425371	0.543	0.446	0.000210844	2
Galphao.1	2.03483e-08	-0.357609	0.482	0.584	0.000242735	2
Stam.1	2.14849e-08	0.408968	0.348	0.251	0.000256293	2
RpL13A.1	2.20796e-08	0.43676	0.692	0.635	0.000263388	2
eEF1beta.1	2.58921e-08	0.486809	0.442	0.355	0.000308866	2
hep.1	2.60589e-08	0.526292	0.386	0.296	0.000310857	2
Uba1.1	2.63359e-08	0.357868	0.269	0.177	0.000314161	2
app.1	2.68635e-08	-0.454544	0.312	0.415	0.000320455	2
RpS13	2.83169e-08	0.416337	0.654	0.584	0.000337793	2
hang	2.92983e-08	-0.429429	0.222	0.326	0.0003495	2
CkIIbeta.1	2.97839e-08	-0.444893	0.225	0.323	0.000355292	2
Atg4a	3.06813e-08	0.494765	0.273	0.187	0.000365998	2
RpS8.1	3.17886e-08	0.46955	0.749	0.701	0.000379206	2
Mapmodulin.1	3.43266e-08	-0.467224	0.174	0.271	0.000409482	2
CG14073.1	3.65509e-08	0.390541	0.473	0.373	0.000436016	2
RpL24-like	3.73562e-08	0.521046	0.254	0.172	0.000445622	2
Hrb27C.1	3.9899e-08	-0.306347	0.692	0.773	0.000475955	2
CG33307	4.38281e-08	0.570334	0.272	0.187	0.000522825	2
RpL4.1	4.7901e-08	0.450463	0.602	0.53	0.000571411	2
Map205.1	4.84249e-08	-0.592291	0.477	0.562	0.00057766	2
Pkn.1	4.87069e-08	-0.404993	0.511	0.601	0.000581025	2
Got2.1	5.11217e-08	0.37692	0.619	0.526	0.00060983	2
lbk.1	5.81498e-08	0.425171	0.335	0.245	0.000693669	2
ttv	5.90063e-08	-0.434896	0.239	0.337	0.000703886	2
CG4199.1	6.00492e-08	0.353138	0.313	0.218	0.000716326	2
Pgm1.1	7.53197e-08	-0.416091	0.185	0.278	0.000898489	2
alpha-Cat	7.61071e-08	-0.448241	0.173	0.264	0.000907881	2
flfl.1	7.68885e-08	-0.448902	0.228	0.323	0.000917203	2
Tango1.1	7.83703e-08	0.402377	0.277	0.192	0.000934879	2
CG12567.1	8.85903e-08	-0.414573	0.226	0.326	0.00105679	2
CG42268.1	8.88307e-08	-0.412009	0.397	0.494	0.00105966	2
Rim2.1	9.37053e-08	-0.533473	0.179	0.27	0.00111781	2
Xe7.1	1.12754e-07	-0.411646	0.236	0.331	0.00134504	2
par-1	1.1341e-07	-0.25234	0.934	0.944	0.00135287	2
RpL26.1	1.33158e-07	0.458292	0.661	0.59	0.00158844	2
RpL9.1	1.36362e-07	0.4514	0.609	0.53	0.00162667	2
RpL10.1	1.47749e-07	0.428417	0.602	0.531	0.0017625	2
RN-tre.1	1.48835e-07	0.4672	0.277	0.194	0.00177545	2
RpL19.1	1.50456e-07	0.446278	0.731	0.669	0.00179479	2
Golgin245.1	1.54527e-07	0.461249	0.282	0.2	0.00184335	2
Ntan1.1	1.54594e-07	0.258257	0.669	0.585	0.00184415	2
RpL18.1	1.7877e-07	0.368921	0.605	0.528	0.00213255	2
CG32276.1	1.959e-07	0.478914	0.354	0.27	0.00233689	2
klar	2.07747e-07	-0.409255	0.4	0.5	0.00247821	2
RpL38.1	2.1571e-07	0.523707	0.452	0.368	0.00257321	2
Chc.1	2.17282e-07	0.407005	0.365	0.282	0.00259196	2
Akt1.1	2.32463e-07	0.378773	0.445	0.354	0.00277306	2
RapGAP1.1	2.36878e-07	-0.506019	0.188	0.275	0.00282571	2
crc.1	2.3827e-07	0.361676	0.445	0.349	0.00284233	2
RpL3.1	2.45177e-07	0.354985	0.687	0.628	0.00292472	2
ctp.1	2.57988e-07	0.378082	0.358	0.271	0.00307754	2
Thor.1	2.74953e-07	0.500436	0.599	0.516	0.00327991	2
sowah.1	2.80074e-07	0.475101	0.395	0.307	0.00334101	2
RpS18	2.8095e-07	0.377601	0.758	0.71	0.00335146	2
RpL11.1	3.06758e-07	0.473713	0.558	0.497	0.00365932	2
NKAIN.1	3.42004e-07	0.405447	0.373	0.29	0.00407977	2
luna.1	3.66841e-07	-0.307696	0.67	0.736	0.00437605	2
hyd	3.67545e-07	0.371243	0.256	0.175	0.00438444	2
Top1.1	3.79447e-07	-0.41232	0.258	0.349	0.00452643	2
cnn.1	3.83821e-07	0.338827	0.345	0.254	0.0045786	2
Bruce.1	4.23438e-07	0.371495	0.433	0.35	0.00505119	2
CG15771	5.77436e-07	-0.461396	0.223	0.312	0.00688823	2
RpS4.1	5.82252e-07	0.421231	0.618	0.562	0.00694569	2
bol.1	5.98049e-07	-0.559939	0.204	0.285	0.00713412	2
CG11400.1	6.1467e-07	-0.372772	0.311	0.41	0.0073324	2
dally.1	6.31773e-07	-0.584419	0.209	0.287	0.00753641	2
CG32695	6.58339e-07	0.475702	0.426	0.347	0.00785333	2
CG34126	6.67008e-07	0.427091	0.26	0.183	0.00795674	2
CG3164.1	6.94945e-07	-0.280578	0.449	0.543	0.00829	2
Nap1.1	6.99077e-07	0.407297	0.316	0.235	0.00833929	2
slmb.1	7.18434e-07	0.378114	0.272	0.191	0.00857019	2
tim.1	7.5371e-07	-0.356889	0.565	0.649	0.00899101	2
csw	8.15224e-07	0.485846	0.509	0.451	0.00972481	2
RpS30.1	8.79908e-07	0.474492	0.574	0.508	0.0104964	2
Ubi-p5E.1	8.92954e-07	0.384522	0.33	0.248	0.010652	2
Ac76E	9.45759e-07	-0.326984	0.297	0.398	0.011282	2
Nacalpha.1	9.72571e-07	0.414457	0.414	0.34	0.0116018	2
Pgant5.1	9.82997e-07	-0.40036	0.203	0.289	0.0117262	2
rudhira	1.00596e-06	-0.333206	0.627	0.702	0.0120001	2
ltl.1	1.16834e-06	0.42901	0.283	0.204	0.0139371	2
Slik	1.18074e-06	0.373466	0.475	0.403	0.014085	2
RpL6	1.27752e-06	0.331543	0.628	0.569	0.0152395	2
CG10077.1	1.29105e-06	-0.25189	0.56	0.649	0.0154009	2
Atx2	1.34221e-06	-0.352983	0.183	0.268	0.0160112	2
eIF4G2.1	1.39663e-06	-0.385858	0.266	0.356	0.0166604	2
CG12163.1	1.53989e-06	-0.447857	0.449	0.521	0.0183694	2
sm.1	1.57481e-06	-0.450687	0.24	0.325	0.0187859	2
B52.1	1.59732e-06	-0.304641	0.25	0.34	0.0190545	2
CG2852.1	1.62238e-06	0.466711	0.32	0.247	0.0193534	2
Cat.1	1.78882e-06	0.407429	0.41	0.329	0.0213388	2
Gyf	1.93053e-06	-0.369329	0.358	0.441	0.0230293	2
RpL37A.1	2.22757e-06	0.45546	0.533	0.472	0.0265727	2
rin	2.50595e-06	-0.319086	0.316	0.415	0.0298935	2
Nup153	2.50757e-06	-0.336188	0.251	0.341	0.0299128	2
CASK.1	3.05407e-06	-0.329541	0.264	0.351	0.036432	2
Cerk.1	3.10038e-06	0.399066	0.379	0.3	0.0369844	2
Npl4.1	3.16944e-06	0.351938	0.27	0.197	0.0378083	2
p120ctn.1	3.18774e-06	-0.36138	0.291	0.376	0.0380266	2
lost.1	3.37867e-06	0.35379	0.453	0.371	0.0403041	2
CG5773.1	3.42771e-06	0.334832	0.293	0.21	0.0408891	2
Oatp30B.1	4.02642e-06	-0.361636	0.522	0.609	0.0480311	2
Scamp.1	4.24072e-06	0.309195	0.313	0.233	0.0505875	2
chb.1	4.34798e-06	0.37028	0.352	0.275	0.051867	2
RpS21.1	4.97159e-06	0.484285	0.605	0.559	0.0593061	2
Mad.1	6.02047e-06	0.426302	0.386	0.309	0.0718182	2
C3G.1	6.1178e-06	-0.374481	0.174	0.251	0.0729792	2
CG32066.1	6.14965e-06	0.296715	0.497	0.417	0.0733592	2
CG9331	6.25629e-06	-0.390039	0.24	0.322	0.0746313	2
sno.1	7.29496e-06	0.332858	0.299	0.226	0.0870216	2
CG15098.1	7.29672e-06	0.428109	0.44	0.37	0.0870426	2
mim.1	8.47896e-06	-0.328408	0.327	0.408	0.101146	2
Cys.1	9.00474e-06	0.512055	0.343	0.28	0.107418	2
Fkbp14	9.36036e-06	-0.384496	0.217	0.292	0.11166	2
Unr.1	9.41142e-06	0.342936	0.747	0.73	0.112269	2
Pde11.1	9.52617e-06	-0.314373	0.547	0.605	0.113638	2
CG32512	9.5766e-06	-0.366254	0.184	0.259	0.114239	2
CG1677.1	1.00289e-05	-0.338258	0.231	0.307	0.119635	2
nmo.1	1.17622e-05	0.279705	0.638	0.557	0.140311	2
Gs2	1.27666e-05	-0.561432	0.274	0.345	0.152293	2
GILT2	1.38911e-05	0.454365	0.278	0.217	0.165707	2
Tango5.1	1.41619e-05	0.415711	0.405	0.34	0.168937	2
Cirl.1	1.52862e-05	0.365282	0.42	0.351	0.182349	2
Plod.1	1.53355e-05	0.296186	0.344	0.263	0.182937	2
Cals.1	1.54752e-05	-0.370172	0.225	0.294	0.184604	2
cathD.1	1.57441e-05	0.345665	0.334	0.262	0.187812	2
RpL36.1	1.63092e-05	0.400128	0.646	0.594	0.194553	2
chrb.1	1.65258e-05	0.285153	0.292	0.215	0.197137	2
Dyrk3	1.70254e-05	-0.261052	0.445	0.529	0.203096	2
Naprt.1	1.77235e-05	0.431429	0.415	0.347	0.211424	2
RpS9.1	1.77621e-05	0.362757	0.631	0.579	0.211884	2
Itpr.1	1.89903e-05	-0.30761	0.265	0.342	0.226536	2
spir.1	1.95391e-05	0.26214	0.426	0.352	0.233082	2
Mrtf.1	2.03102e-05	0.437049	0.327	0.26	0.24228	2
RpL7A.1	2.05538e-05	0.37916	0.647	0.616	0.245187	2
gro	2.42918e-05	-0.321744	0.231	0.307	0.289777	2
Tep2	2.58775e-05	-0.309626	0.234	0.312	0.308693	2
RpL36A.1	2.60662e-05	0.431114	0.61	0.561	0.310944	2
dlg1.1	3.25542e-05	-0.30742	0.341	0.419	0.388339	2
Nedd4.1	3.313e-05	0.338889	0.387	0.313	0.395208	2
RpS19a	3.83629e-05	0.343743	0.522	0.469	0.457631	2
Sar1	3.89601e-05	-0.388572	0.294	0.361	0.464754	2
dco.1	3.92439e-05	0.255084	0.355	0.277	0.46814	2
Sod1	4.13913e-05	0.43365	0.273	0.213	0.493756	2
CG12004.1	4.40614e-05	0.343966	0.321	0.252	0.525609	2
noc.1	4.64979e-05	0.26156	0.264	0.198	0.554673	2
CG31523.1	4.83555e-05	0.342121	0.312	0.248	0.576833	2
UK114.1	4.88658e-05	-0.295224	0.363	0.439	0.582921	2
AGO3	5.58618e-05	-0.466038	0.19	0.252	0.666375	2
Rox8.1	5.81371e-05	-0.339272	0.228	0.3	0.693517	2
Mondo	7.02883e-05	-0.328525	0.61	0.67	0.838469	2
Non1	7.72566e-05	0.319525	0.398	0.334	0.921594	2
Atg17	7.86658e-05	0.278654	0.533	0.467	0.938405	2
Gclc.1	8.25308e-05	0.319182	0.58	0.514	0.98451	2
Nep4.1	8.48292e-05	0.291036	0.268	0.203	1	2
Csk.1	8.93236e-05	-0.352806	0.43	0.497	1	2
AGO2.1	9.01643e-05	0.309328	0.284	0.219	1	2
CG6145.1	9.12018e-05	-0.468945	0.396	0.458	1	2
CG12116.1	9.14783e-05	-0.372139	0.359	0.431	1	2
Vha26.1	9.48897e-05	0.35108	0.308	0.246	1	2
RpS17.1	9.51072e-05	0.342563	0.58	0.527	1	2
Crtc	0.000107469	-0.258989	0.454	0.522	1	2
simj	0.000108299	-0.33069	0.225	0.293	1	2
Marf.1	0.000112351	-0.298307	0.26	0.328	1	2
CG4080.1	0.000121232	0.407325	0.316	0.257	1	2
RpS15Aa.1	0.000131704	0.339647	0.525	0.475	1	2
pnt.1	0.000136986	-0.304587	0.232	0.302	1	2
CG5853	0.000138928	-0.377527	0.247	0.313	1	2
nuf.1	0.000150844	0.256261	0.594	0.533	1	2
Dad.1	0.000161441	0.344054	0.51	0.457	1	2
ced-6.1	0.000171069	-0.332159	0.435	0.492	1	2
tara	0.000183486	-0.272531	0.334	0.403	1	2
path.1	0.000189388	-0.403189	0.925	0.875	1	2
Rab14	0.000192196	0.30675	0.263	0.204	1	2
RpLP2	0.000192215	0.41847	0.676	0.648	1	2
pico	0.000192865	-0.348058	0.202	0.265	1	2
Flo2.1	0.000212684	0.28572	0.353	0.285	1	2
Hnf4.1	0.000218297	-0.283312	0.599	0.66	1	2
CrebA.1	0.000223052	-0.627849	0.204	0.269	1	2
glec.1	0.000239171	0.322784	0.411	0.346	1	2
CG8079	0.000251764	-0.309868	0.246	0.306	1	2
Pka-R2.1	0.00025757	-0.260197	0.242	0.314	1	2
Taldo.1	0.000267279	-0.381351	0.255	0.316	1	2
RpS20.1	0.000276325	0.374693	0.596	0.556	1	2
eIF1	0.000325806	0.368862	0.254	0.201	1	2
Cyt-b5	0.000367558	0.363209	0.514	0.48	1	2
mt:CoIII	0.000422856	0.432435	0.275	0.22	1	2
spri.1	0.00044779	-0.276098	0.613	0.646	1	2
CG5381.1	0.000462624	-0.301377	0.203	0.26	1	2
galectin.1	0.000463891	-0.271697	0.222	0.281	1	2
eEF1gamma.1	0.00055828	0.332793	0.362	0.305	1	2
RpL13	0.000595891	0.342806	0.595	0.558	1	2
wcy	0.000629927	-0.261115	0.208	0.263	1	2
CG10512	0.000656448	0.338817	0.255	0.198	1	2
CNBP	0.000683327	-0.338203	0.212	0.267	1	2
rdgA	0.000807854	-0.350573	0.195	0.251	1	2
jar	0.000824299	-0.258265	0.368	0.429	1	2
Pcf11.1	0.000958191	-0.256147	0.385	0.449	1	2
RpS16	0.00100522	0.283902	0.575	0.55	1	2
Idgf4.1	0.00101965	0.284165	0.327	0.276	1	2
Atf3.1	0.00114552	-0.372959	0.254	0.308	1	2
Sap47	0.00131039	-0.310558	0.319	0.378	1	2
RpS6.1	0.0013716	0.305358	0.514	0.485	1	2
CanA-14F	0.00138858	-0.276859	0.393	0.447	1	2
mt:CoI.1	0.00142893	0.319355	0.287	0.238	1	2
Dp1	0.00143926	-0.280812	0.206	0.257	1	2
CG33144	0.00149265	-0.2688	0.197	0.251	1	2
RpS24.1	0.00152891	0.410727	0.433	0.39	1	2
UbcE2H.1	0.00164529	-0.318691	0.32	0.37	1	2
CD98hc.1	0.00165598	0.259169	0.261	0.209	1	2
CG18067	0.00197943	-0.850148	0.439	0.497	1	2
[truncated: 3,230 more rows]
