# Supplementary material for: DNA damage signaling in Drosophila macrophages modulates systemic cytokine levels in response to oxidative stress
Source: eLife. 2024 Jan 8;12:RP86700. doi: 10.7554/eLife.86700 (PMC10945508; doi:10.7554/eLife.86700)
Supplement: Supplementary file 3. [file elife-86700-supp3.xlsx]

## Sheet: Tabelle1
List of Drosophila lines used in this study	Source	ID
w1118;Hml∆ -Gal4,UAS-2xeGFP	Gift from Marc S. Dionne	N/A
w1118;UAS-tefu-IR	Vienna Drosophila Research Center	VDRC ID: 108074
w1118;UAS-mei41-IR	Vienna Drosophila Research Center	VDRC ID: 11251
w1118;UAS-nbs-IR	Vienna Drosophila Research Center	VDRC ID:110366
w1118;UAS-mei41-IR;UAS-tefu-IR	made for this study	N/A
w1118;UAS-bsk-DN	Vienna Drosophila Research Center	VDRC ID: 104569
w1118;;HmlΔ-DsRed.nuc	Gift from Katie J. Woodcock	N/A
w1118;UAS-upd3-IR	Vienna Drosophila Research Center	VDRC ID: 106869
w1118;Hml∆ -Gal4,UAS-2xeGFP;tubGal80/tm6csb´	Gift from Katie J. Woodcock	N/A
w1118;UAS-hep[act]/CyO; Dr/tm6csb'	Gift from Anne-Kathrin Classen	N/A
w1118;UAS-upd3/Sm6a	Gift from Katie J. Woodcock	N/A
w[*] upd3[Δ]	Bloomington Drosophila Stock Center	BDSC ID: 55728
w´upd3Δ; UAS-upd3/Sm6a	made for this study	N/A
w1118;tub-Gal80ts/Sm6a;crq-Gal4/TM6 c, Sb'	Gift from Marc S. Dionne	N/A
w1118;;UAS-rpr/TM6 c, Sb1	Bloomington Drosophila Stock Center	BDSC ID: 5824
w1118;UAS-CD8-mCherry	Bloomington Drosophila Stock Center	BDSC ID: 27391
List of RTqPCR primers used in this study	Source
Primer: Rpl1_for 5’-TCCACCTTGAAGAAGGGCTA-3’	Designed for this study
Primer: Rpl1_rev 5’-TTGCGGATCTCCTCAGACTT-3’	Designed for this study
Primer: Upd1_for 5’-GCACACTGATTTCGATACGG-3’	Designed for this study
Primer: Upd1_rev 5’-CTGCCGTGGTGCTGTTTT-3’	Designed for this study
Primer: Upd2_for 5’-CGGAACATCACGATGAGCGAAT-3’	Designed for this study
Primer: Upd2_rev 5’-TCGGCAGGAACTTGTACTCG-3’	Designed for this study
Primer: Upd3_for 5’-ACTGGGAGAACACCTGCAAT-3’	Designed for this study
Primer: Upd3_rev 5’-GCCCGTTTGGTTCTGTAGAT-3’	Designed for this study
Primer: Socs36E_for 5’-AAAAAGCCAGCAAACCAAAA-3’	Designed for this study
Primer: Socs36E_rev 5’-AGGTGATGACCCATTGGAAG-3’	Designed for this study
Primer: TotA_for 5’-CCAAAATGAATTCTTCAACTGC-3’	Designed for this study
Primer: TotA_rev 5’-GAATAGCCCATGCATAGAGGAC-3’	Designed for this study
Primer: Puc_for 5’-CGTCATCATCAACGGCAAT-3’	Designed for this study
Primer: Puc_rev 5’-AGGCGGGGTGTGTTTCTAT-3’	Designed for this study
Primer: Ilp-2_for 5’-ATCCCGTGATTCCACCACAAG-3’	Designed for this study
Primer: Ilp-2_rev 5’-GCGGTTCCGATATCGAGTTA-3’	Designed for this study
Primer: Ilp-3_for 5’- CAACGCAATGACCAAGAGAA-3’	Designed for this study
Primer: Ilp-3_rev 5’-TGAGCATCTGAACCGAACT-3’	Designed for this study
Primer: Ilp-5_for 5’-GCCTTGATGGACATGCTGA-3’	Designed for this study
Primer: Ilp-5_rev 5’-AGCTATCCAAATCCGCCA-3’	Designed for this study
Primer: Thor_for 5’- CAGGAAGGTTGTCATCTCGGA-3’	Designed for this study
Primer: Thor_rev 5’-GGAGTGGTGGAGTAGAGGGTT-3’	Designed for this study
Primer: Pepck_for 5’-GGATAAGGTGGACGTGAAG-3’	Designed for this study
Primer: Pepck_rev 5’-ACCTCCTGCGACCAGAACT-3’	Designed for this study
Primer: InR_for 5’-GCACCATTATAACCGGAACC-3’	Designed for this study
Primer: InR_rev 5’-TTAATTCATCCATGACGTGAGC-3’	Designed for this study
Primer: Def_for 5’-TTCTCGTGGCTATCGCTTTT-3’	Designed for this study
Primer: Def_rev 5’-GGAGAGTAGGTCGCATGTGG-3’	Designed for this study
Primer: AttA_for 5’-CACAATGTGGTGGGTCAGG	Designed for this study
Primer: AttA_rev 5’-GGCACCATGACCACCATT	Designed for this study
Primer: DiptA_for 5’-ACCGCAGTACCCACTCAATC	Designed for this study
Primer: DiptA_rev 5’-CCCAAGTGCTGTCCATATCC	Designed for this study
Primer: Mtk_for 5’-TCTTGGAGCGATTTTTCTGG	Designed for this study
Primer: Mtk_rev 5’-TCTGCCAGCACTGATGTAGC	Designed for this study
Primer: Dro_for 5’-CCATCGAGGATCACCTGACT	Designed for this study
Primer: Dro_rev 5’-CTTTAGGCGGGCAGAATG	Designed for this study
Primer: Drs_for 5’-GTACTTGTTCGCCCTCTTCG	Designed for this study
Primer: Drs_rev 5’-CTTGCACACACGACGACAG	Designed for this study
Primer: daw_for 5’-CAGTCGGTGAATGTGCAAGA	Designed for this study
Primer: daw_rev 5’-GAGGTGGCTCAGCTCGTG	Designed for this study
Primer: dpp_for 5’-GCTGATTGGATACATAATTCTCAGG	Designed for this study
Primer: dpp_rev 5’-TTTGAAAAGTCGCCAGCAC	Designed for this study
Primer: eiger_for 5’-CGACGAGTTCCAAAAGGAGT	Designed for this study
Primer: eiger_rev 5’-GTCGTCGTCCTCCTCATC	Designed for this study
